# Supplementary material for: Theoretical study of reductive CO2 functionalization with amines and phenylsilanes: what kind of solvents can be used as catalysts?
Source: Royal Society of Chemistry journal article supplement (doi:10.1039/d3cy00682d), 2023-01-01
Supplement: d3cy00682d1.pdf [file d3cy00682d1.pdf]

## Supporting Information

### **Theoretical study of reductive CO<sub>2</sub> functionalization with amines and phenylsilanes: What kind of solvents can be used as catalysts?**

Pan Du<sup>a</sup>, Xinyue Liu<sup>b</sup>, Xinyi Dong<sup>b</sup>, Nianyang Li<sup>b</sup>, Rui Liu<sup>c</sup>, Li Li<sup>b</sup>, Jiyang Zhao<sup>\*.b</sup>

<sup>a</sup>School of Life Science and Chemistry, Jiangsu Second Normal University, Nanjing  
210013, China

<sup>b</sup>School of Environmental Science, Nanjing Xiaozhuang University, Nanjing 211171,  
China

<sup>c</sup>Nanjing Therarna Biotech Ltd.

jyzhao1981@163.com

## Table of Contents

|                                                                                                                                                                                                                              |     |
|------------------------------------------------------------------------------------------------------------------------------------------------------------------------------------------------------------------------------|-----|
| <b>Figure S1.</b> The geometry structures of reduction of CO <sub>2</sub> with PhSiH <sub>3</sub> in the presence of different species in the reaction system.....                                                           | s4  |
| <b>Figure S2.</b> Optimized intermediates and transition states of CO <sub>2</sub> reduction with N-methylaniline and PhSiH <sub>3</sub> using DMF as catalyst to give triformyloxysilane [Si](OCHO) <sub>3</sub> .....      | s5  |
| <b>Figure S3.</b> Free energy profile of C–N bond formation to give second and third formamides. ....                                                                                                                        | s6  |
| <b>Figure S4.</b> Optimized intermediates and transition states of C–N bond formation to give first and second formamides. ....                                                                                              | s7  |
| <b>Figure S5.</b> Optimized intermediates and transition states of C–N bond formation to give third formamide.....                                                                                                           | s8  |
| <b>Figure S6.</b> Optimized intermediates and transition states of DMF-catalyzed IM6 reduction with PhSiH <sub>3</sub> to form N, N-dimethylaniline (part A).....                                                            | s9  |
| <b>Figure S7.</b> Optimized intermediates and transition states of DMF-catalyzed IM6 reduction with PhSiH <sub>3</sub> to form N, N-dimethylaniline (part B).....                                                            | s10 |
| <b>Figure S8.</b> Free energy profile of DMF-catalyzed IM14 reduction with PhSiH <sub>3</sub> to form aminal intermediate. The optimized structures of the stationary points are shown (key bond lengths in angstroms). .... | s11 |
| <b>Figure S9.</b> Optimized intermediates and transition states of DMF-catalyzed IM14 reduction with PhSiH <sub>3</sub> to form aminal intermediate.....                                                                     | s12 |
| <b>Figure S10.</b> Free energy profile of aminal transforms to N, N-dimethylaniline. The optimized structures of the stationary points are shown (key bond lengths in angstroms).....                                        | s13 |
| <b>Figure S11.</b> Optimized intermediates and transition states of aminal transforms to N,                                                                                                                                  |     |

|                                                                                                                                                 |     |
|-------------------------------------------------------------------------------------------------------------------------------------------------|-----|
| N-dimethylaniline.....                                                                                                                          | s14 |
| <b>Figure S12.</b> Optimized intermediates and transition states of CO <sub>2</sub> reduction by phenylsilane in different solvents.....        | s15 |
| <b>Figure S13.</b> Optimized intermediates and transition states of CO <sub>2</sub> reduction by phenylsilane in other commercial solvents..... | s16 |
| <b>Table S1.</b> Detailed information of other commercial solvents.....                                                                         | s17 |
| <b>Table S2.</b> Corrected free energies of all species.....                                                                                    | s18 |
| <b>Table S3.</b> Imaginary frequencies of all transition states. ....                                                                           | s20 |
| <b>Table S4.</b> Cartesian coordinates of all species.....                                                                                      | s21 |

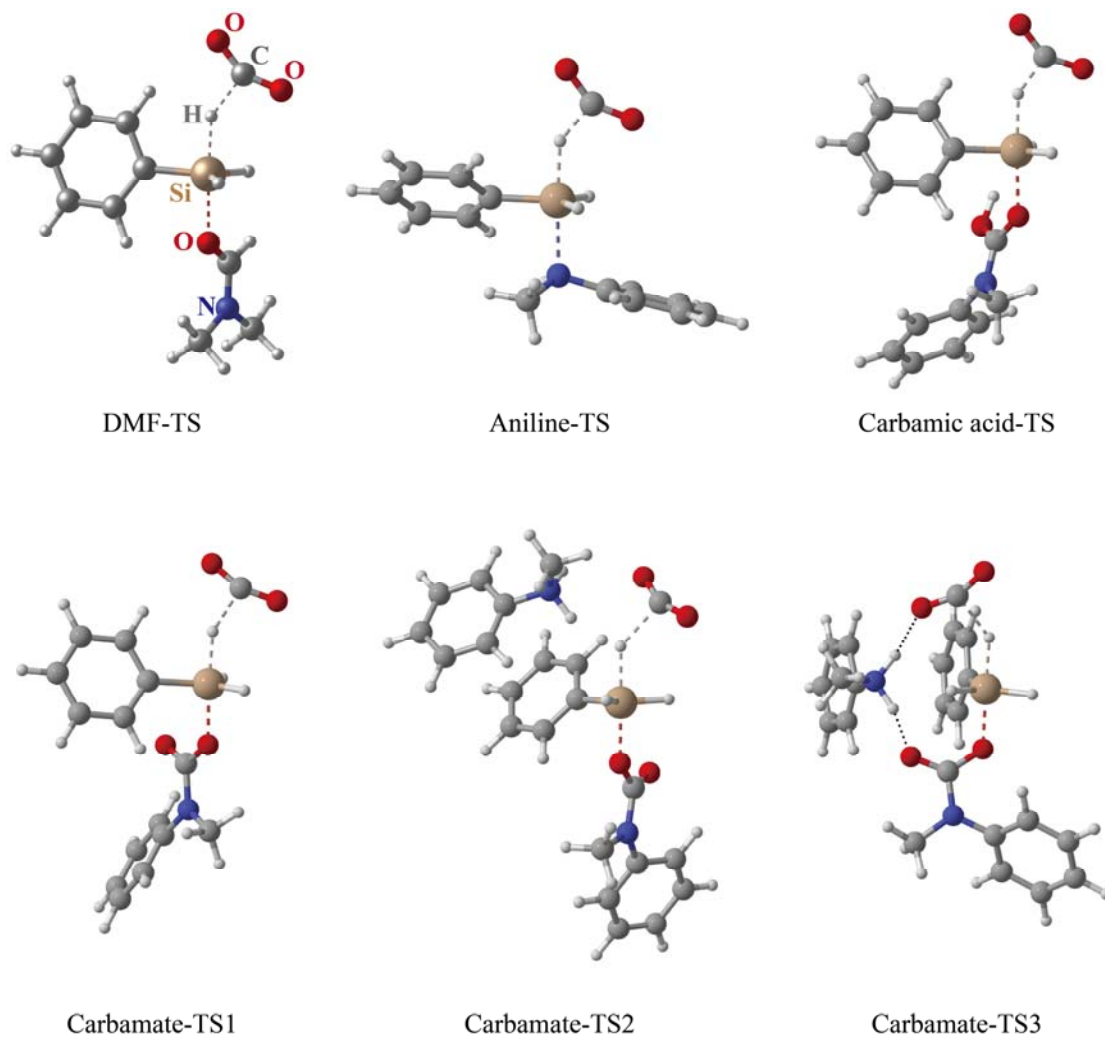

**Figure S1.** The geometry structures of reduction of CO<sub>2</sub> with PhSiH<sub>3</sub> in the presence of different species in the reaction system.

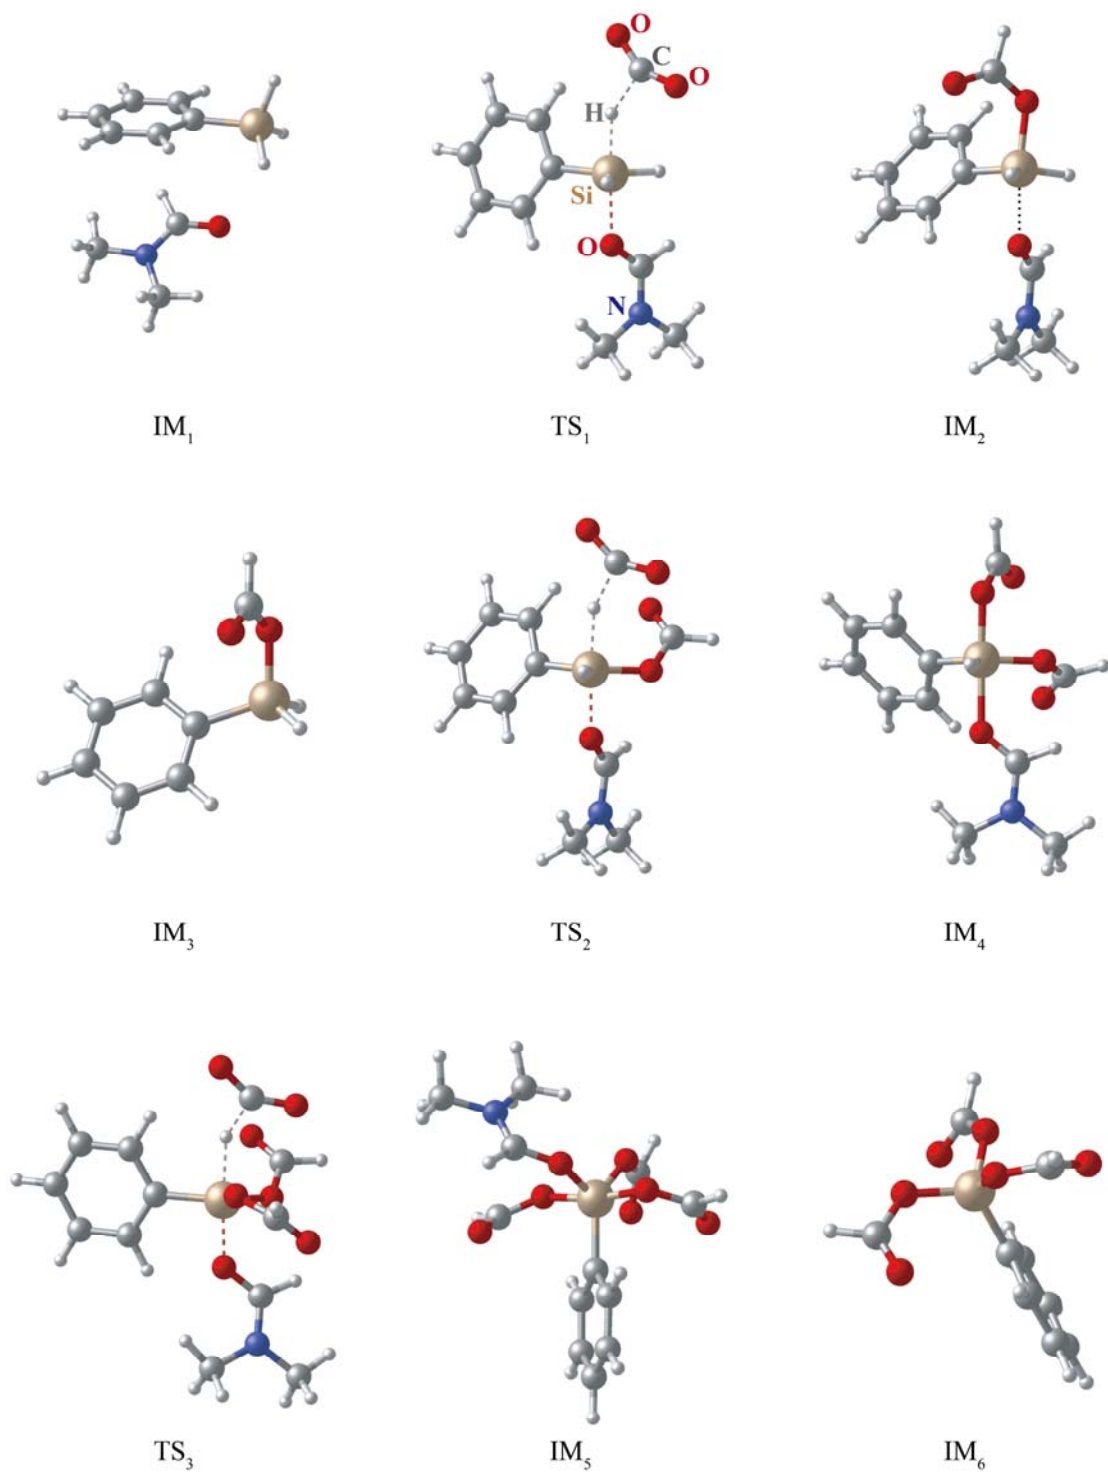

**Figure S2.** Optimized intermediates and transition states of CO<sub>2</sub> reduction with *N*-methylaniline and PhSiH<sub>3</sub> using DMF as catalyst to give triformyloxysilane [Si](OCHO)<sub>3</sub>.

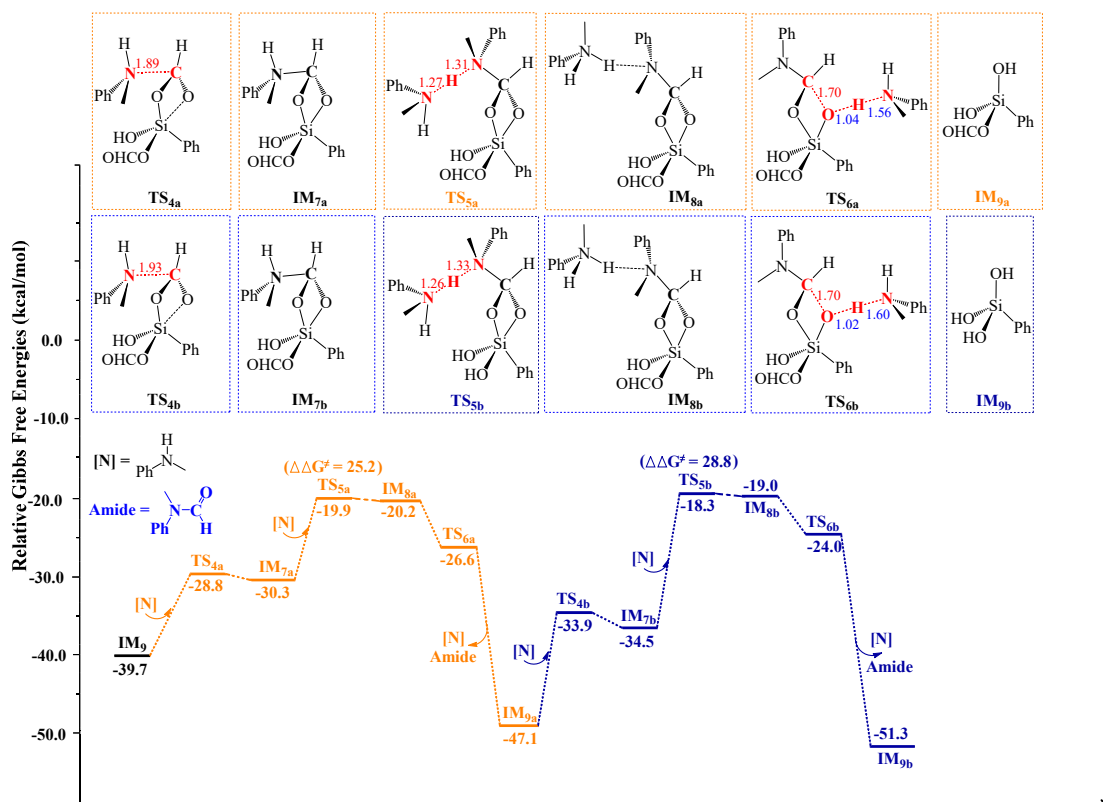

**Figure S3.** Free energy profile of C–N bond formation to give second and third formamides. The optimized structures of the stationary points are shown (key bond lengths in angstroms).

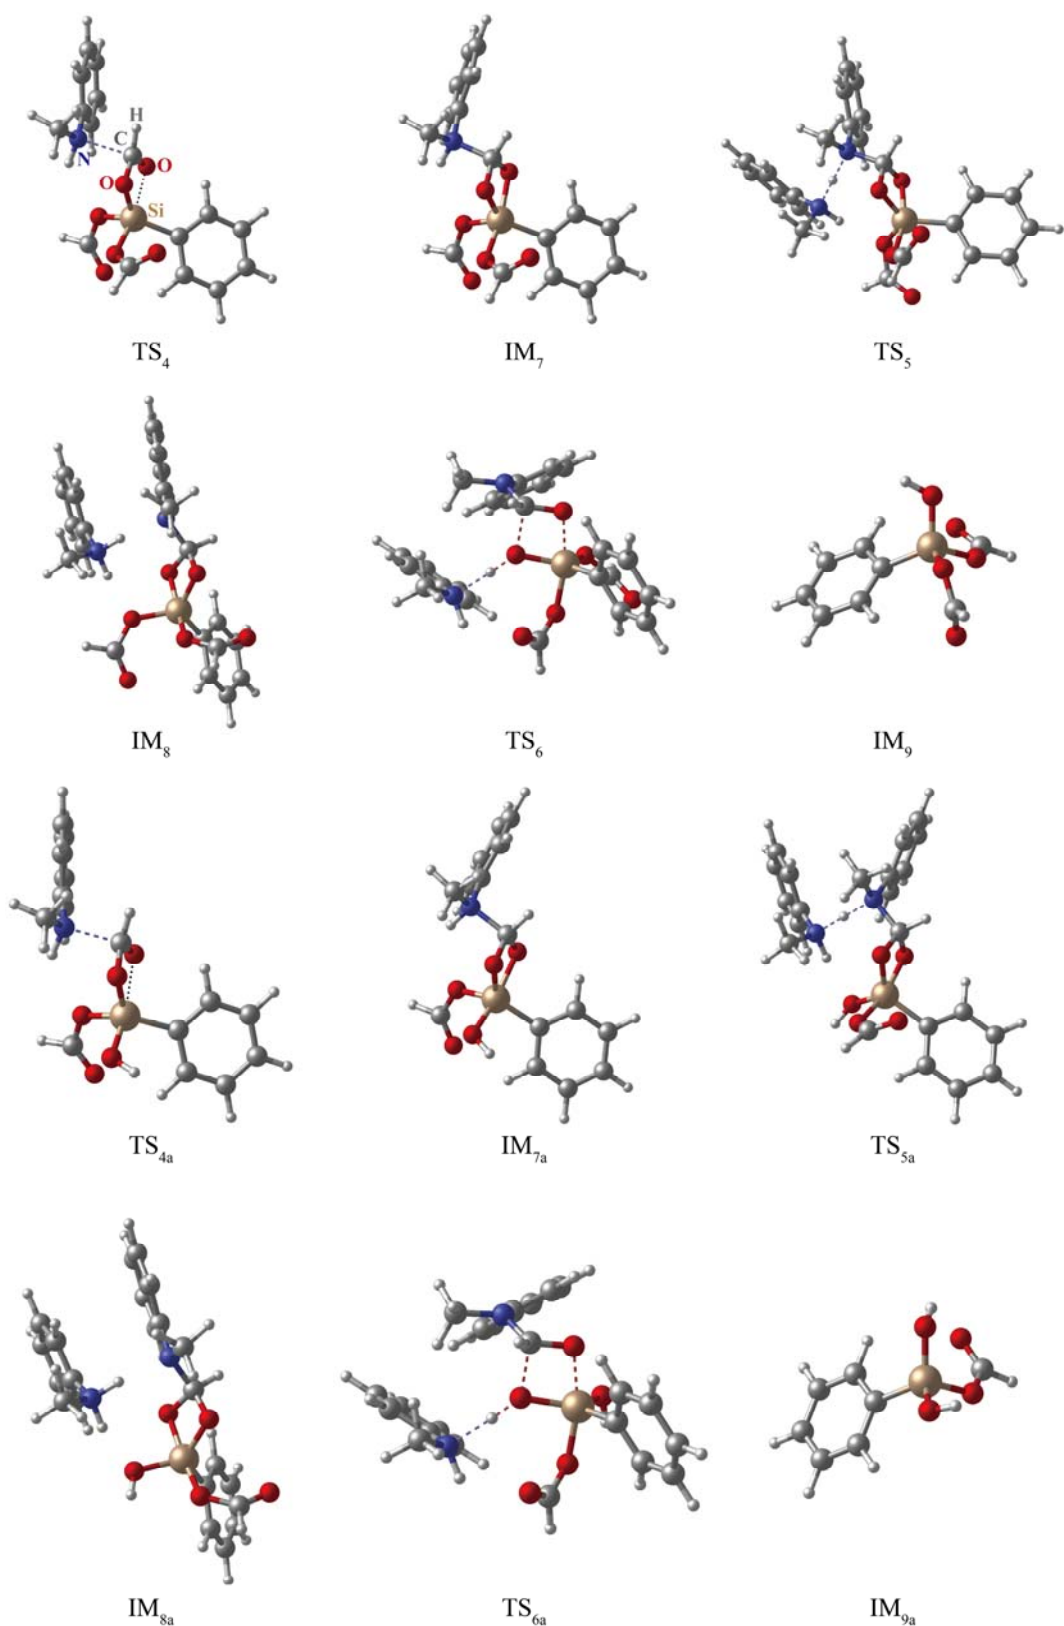

**Figure S4.** Optimized intermediates and transition states of C–N bond formation to give first and second formamides.

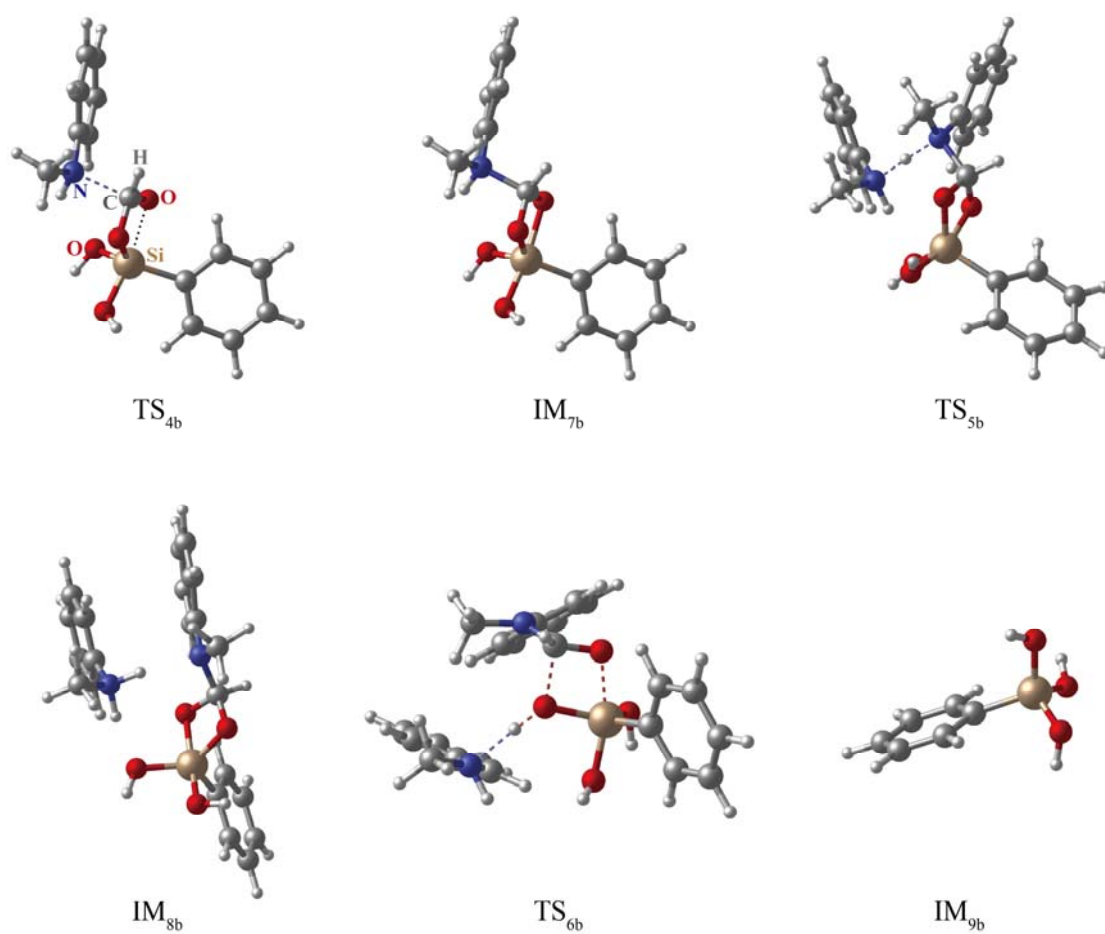

**Figure S5.** Optimized intermediates and transition states of C–N bond formation to give third formamide.



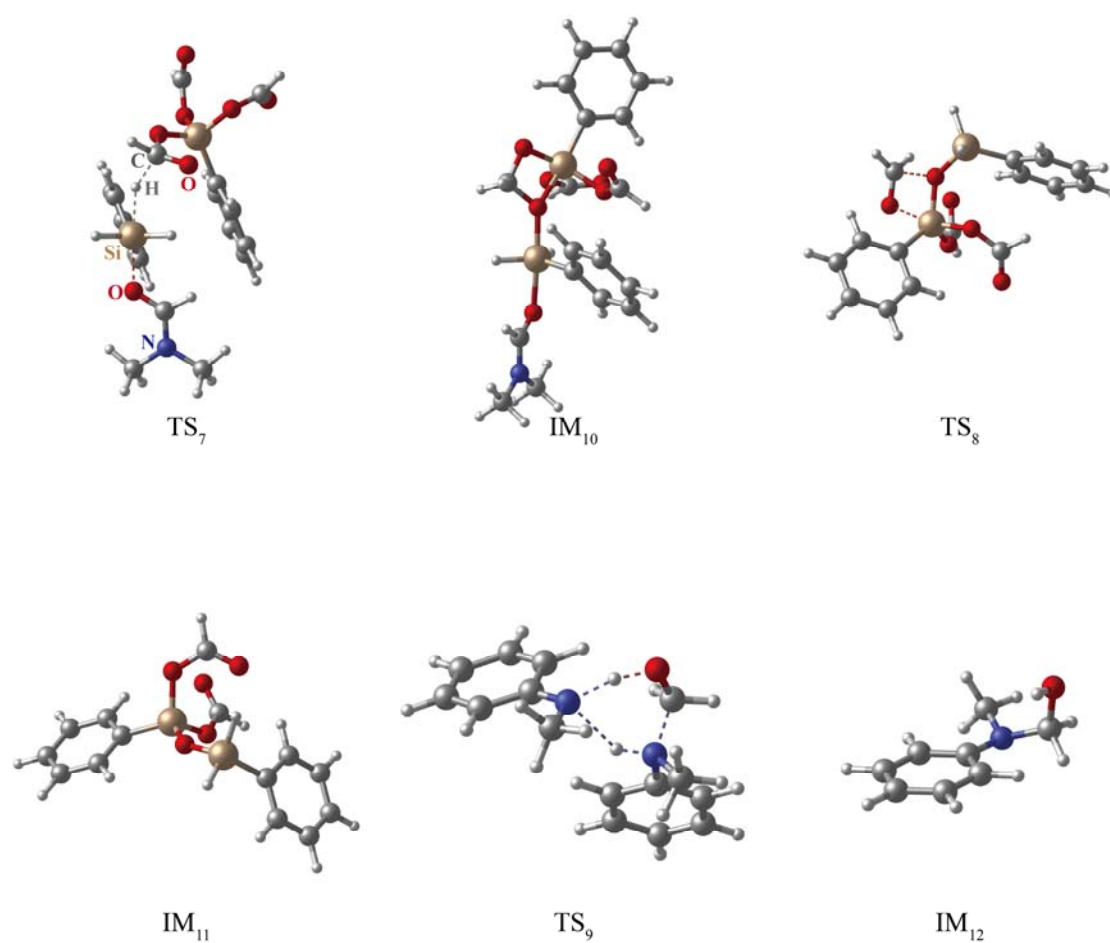

**Figure S6.** Optimized intermediates and transition states of DMF-catalyzed **IM<sub>6</sub>** reduction with PhSiH<sub>3</sub> to form *N,N*-dimethylaniline (part A).

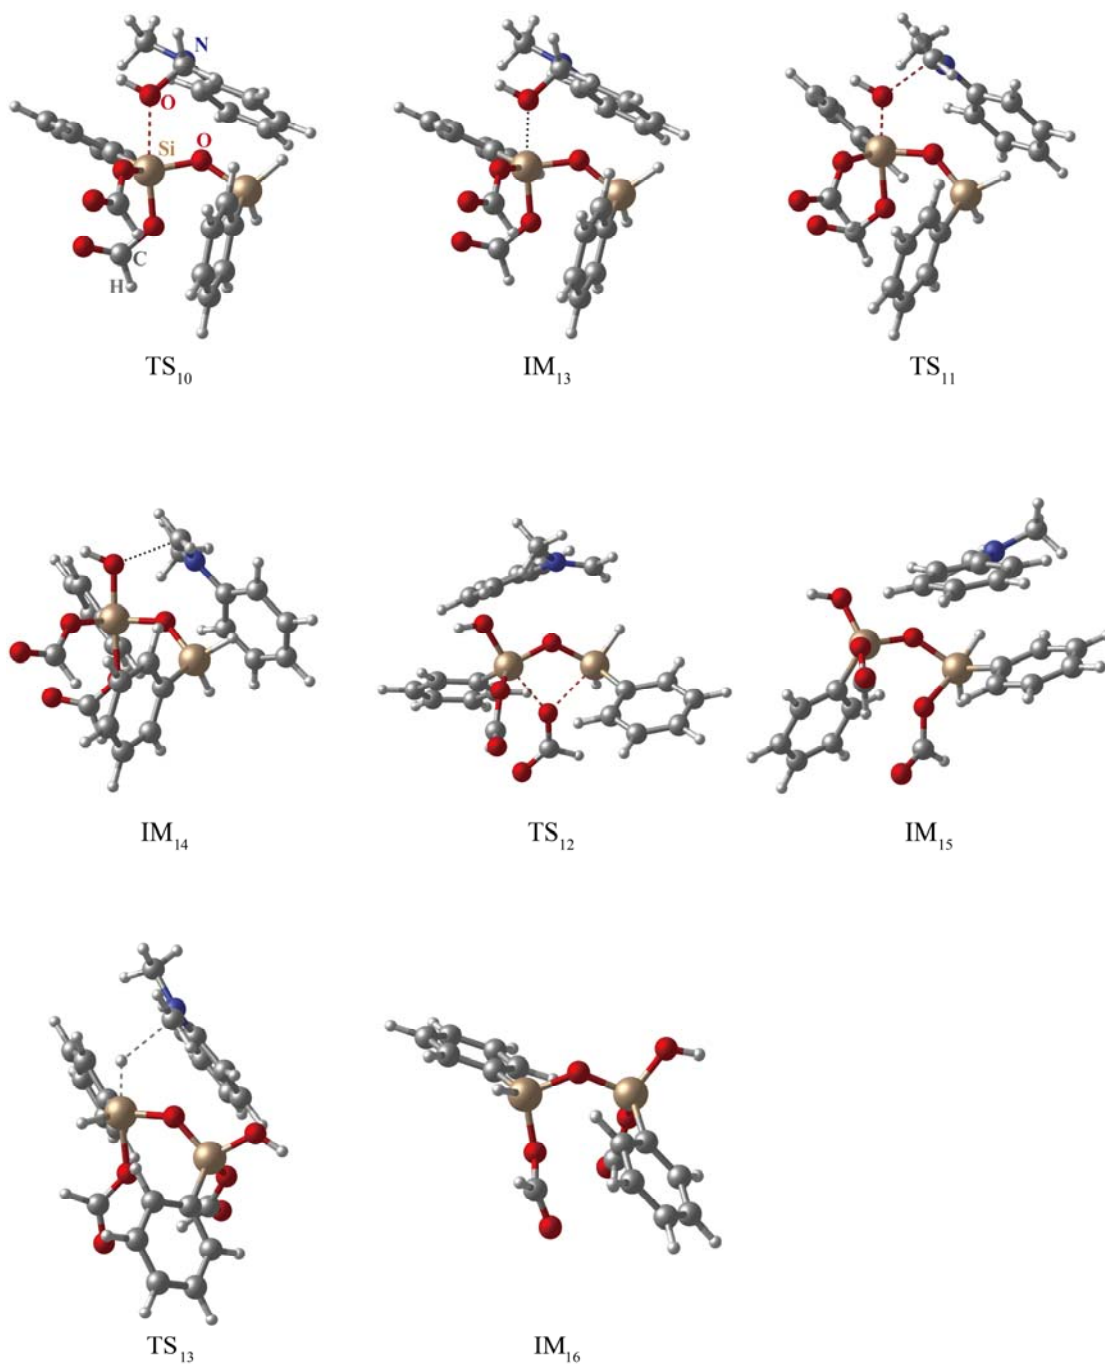

**Figure S7.** Optimized intermediates and transition states of DMF-catalyzed **IM<sub>6</sub>** reduction with PhSiH<sub>3</sub> to form *N,N*-dimethylaniline (part B).

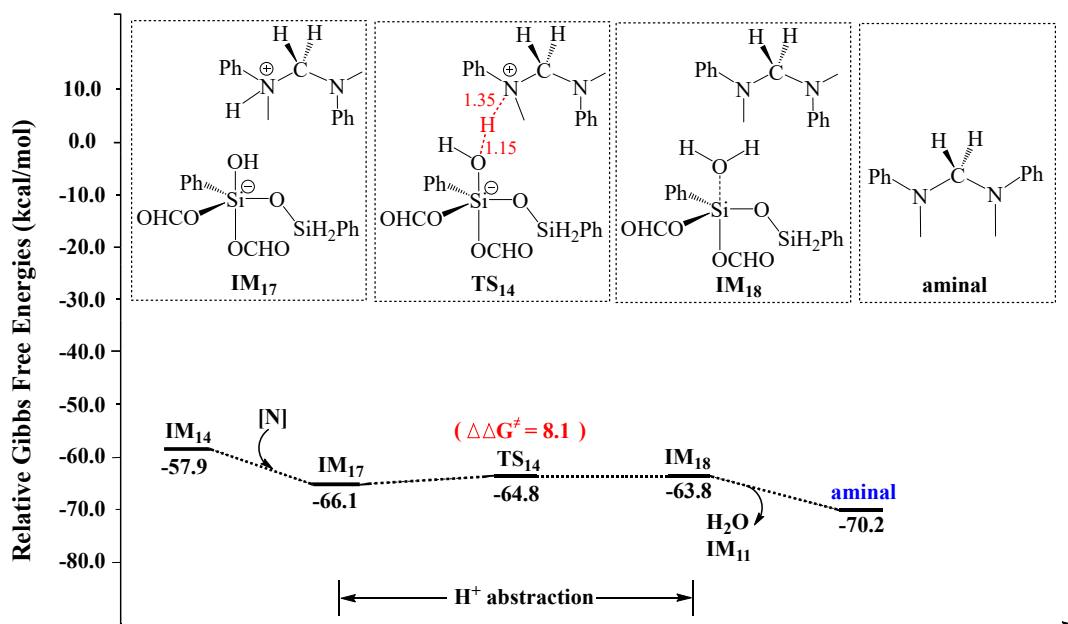

**Figure S8.** Free energy profile of DMF-catalyzed **IM**<sub>14</sub> reduction with PhSiH<sub>3</sub> to form amination intermediate. The optimized structures of the stationary points are shown (key bond lengths in angstroms).

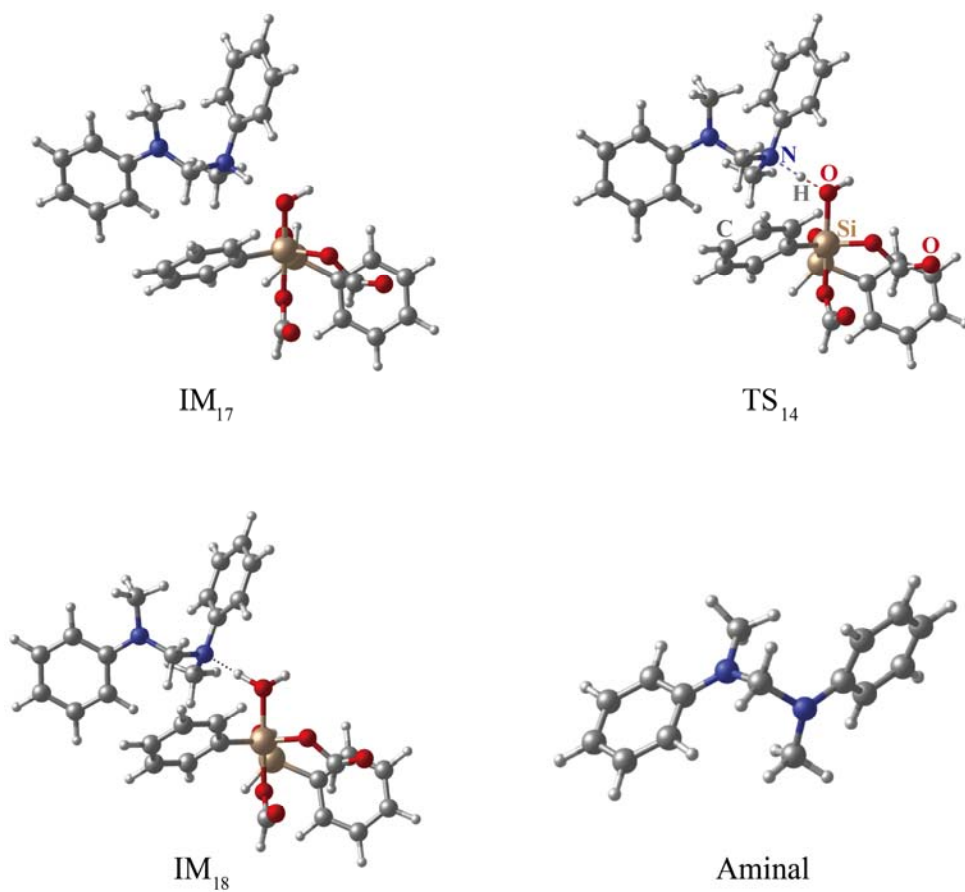

**Figure S9.** Optimized intermediates and transition states of DMF-catalyzed IM<sub>14</sub> reduction with PhSiH<sub>3</sub> to form aminoal intermediate.

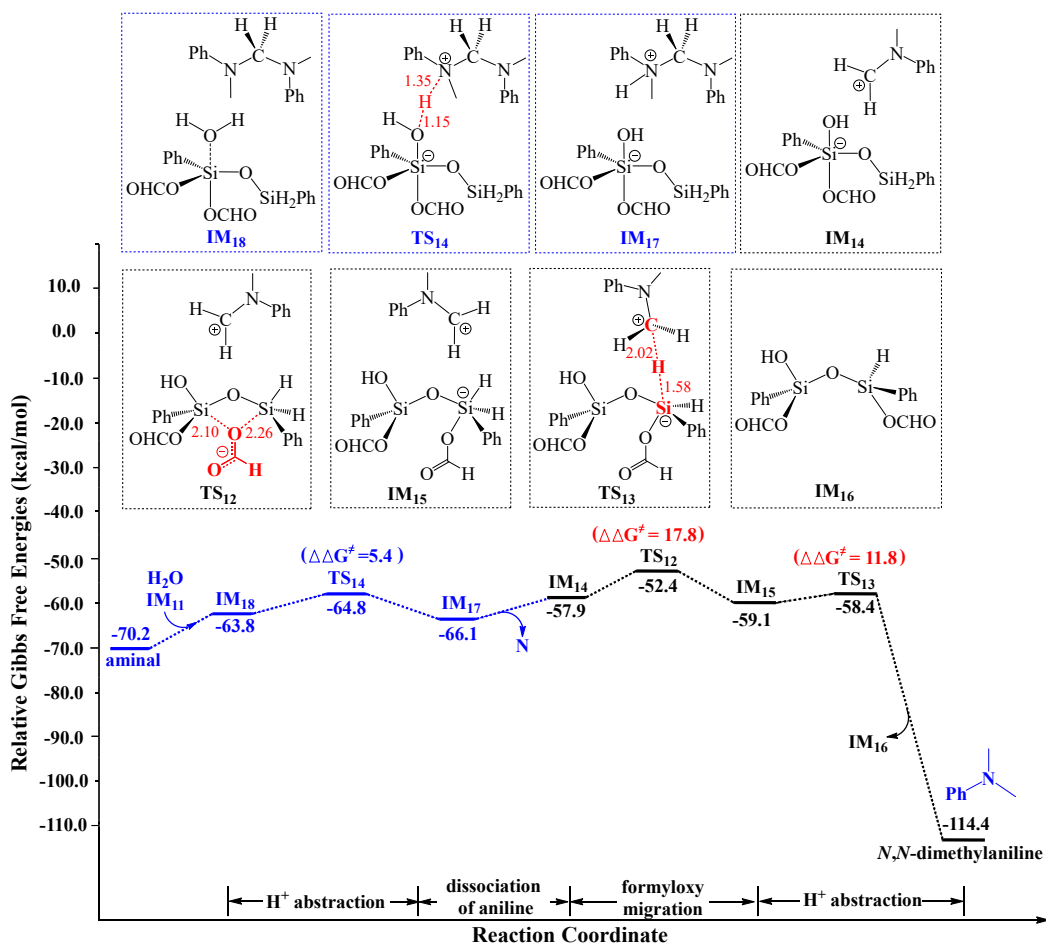

**Figure S10.** Free energy profile of aminal transforms to *N,N*-dimethylaniline. The optimized structures of the stationary points are shown (key bond lengths in angstroms).

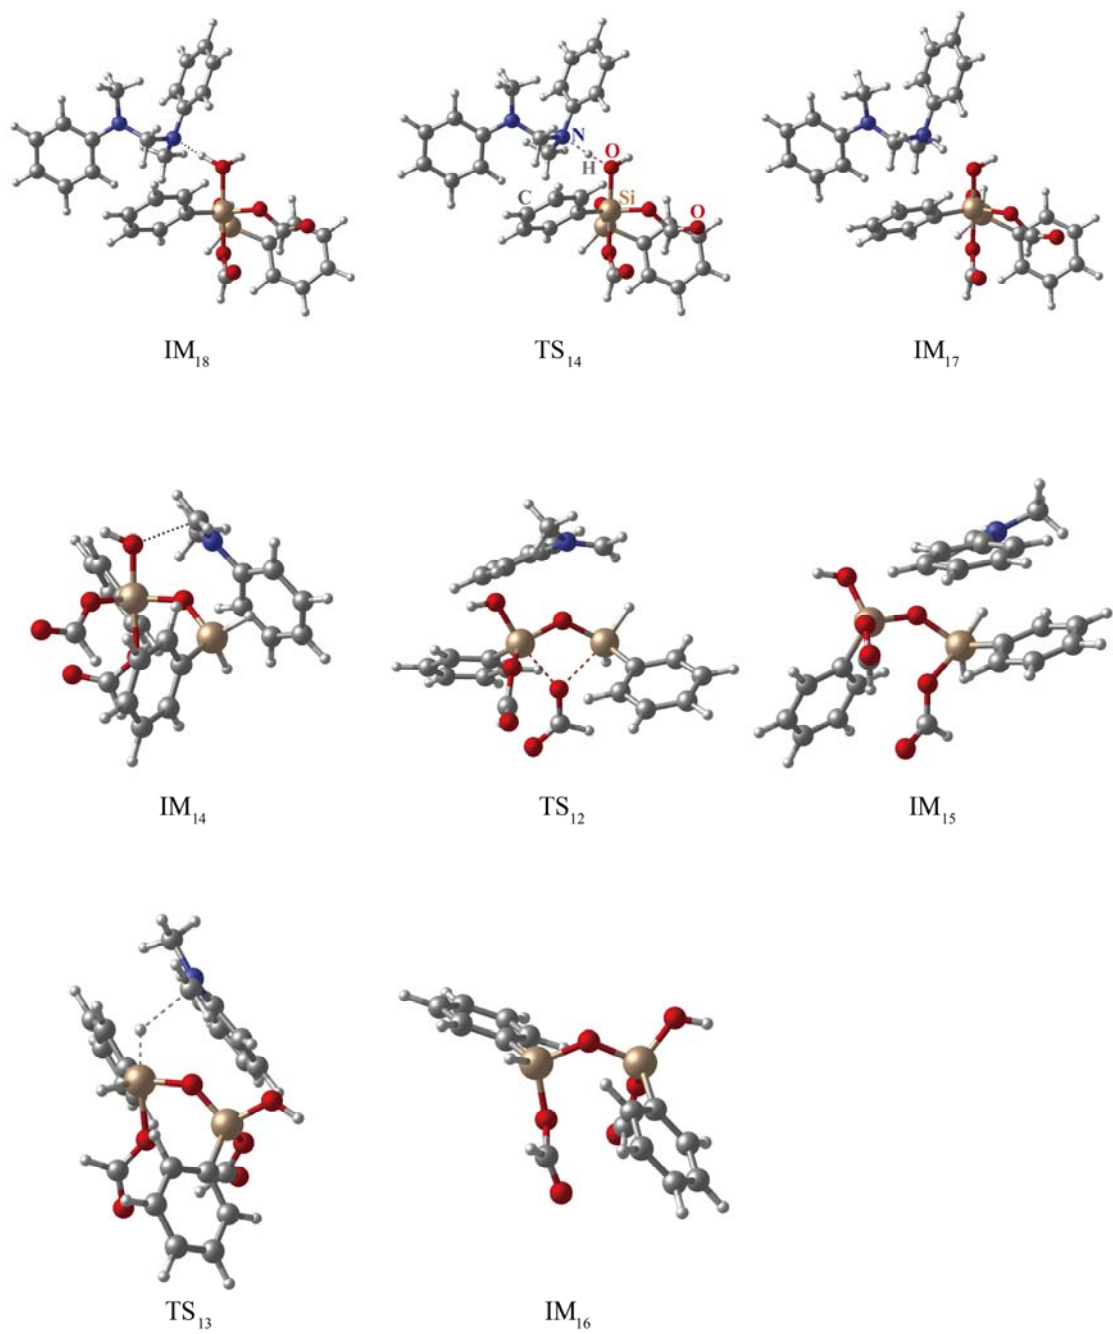

**Figure S11.** Optimized intermediates and transition states of amination of *N*,  
*N*-dimethylaniline.

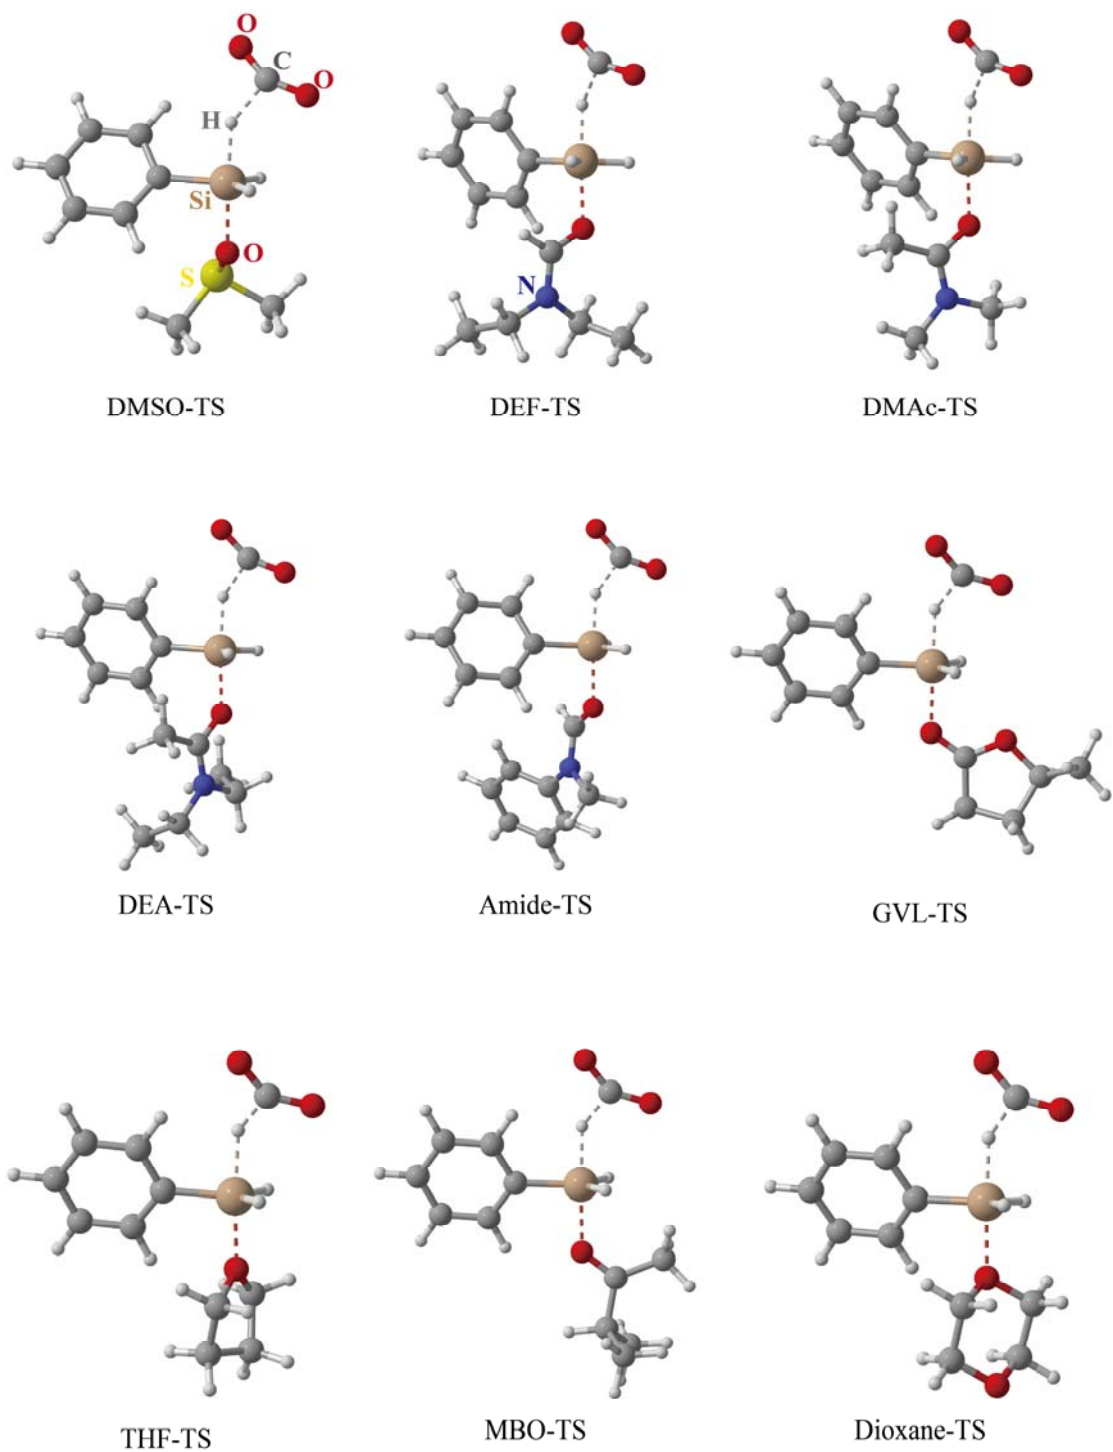

**Figure S12.** Optimized intermediates and transition states of CO<sub>2</sub> reduction by phenylsilane in different solvents.

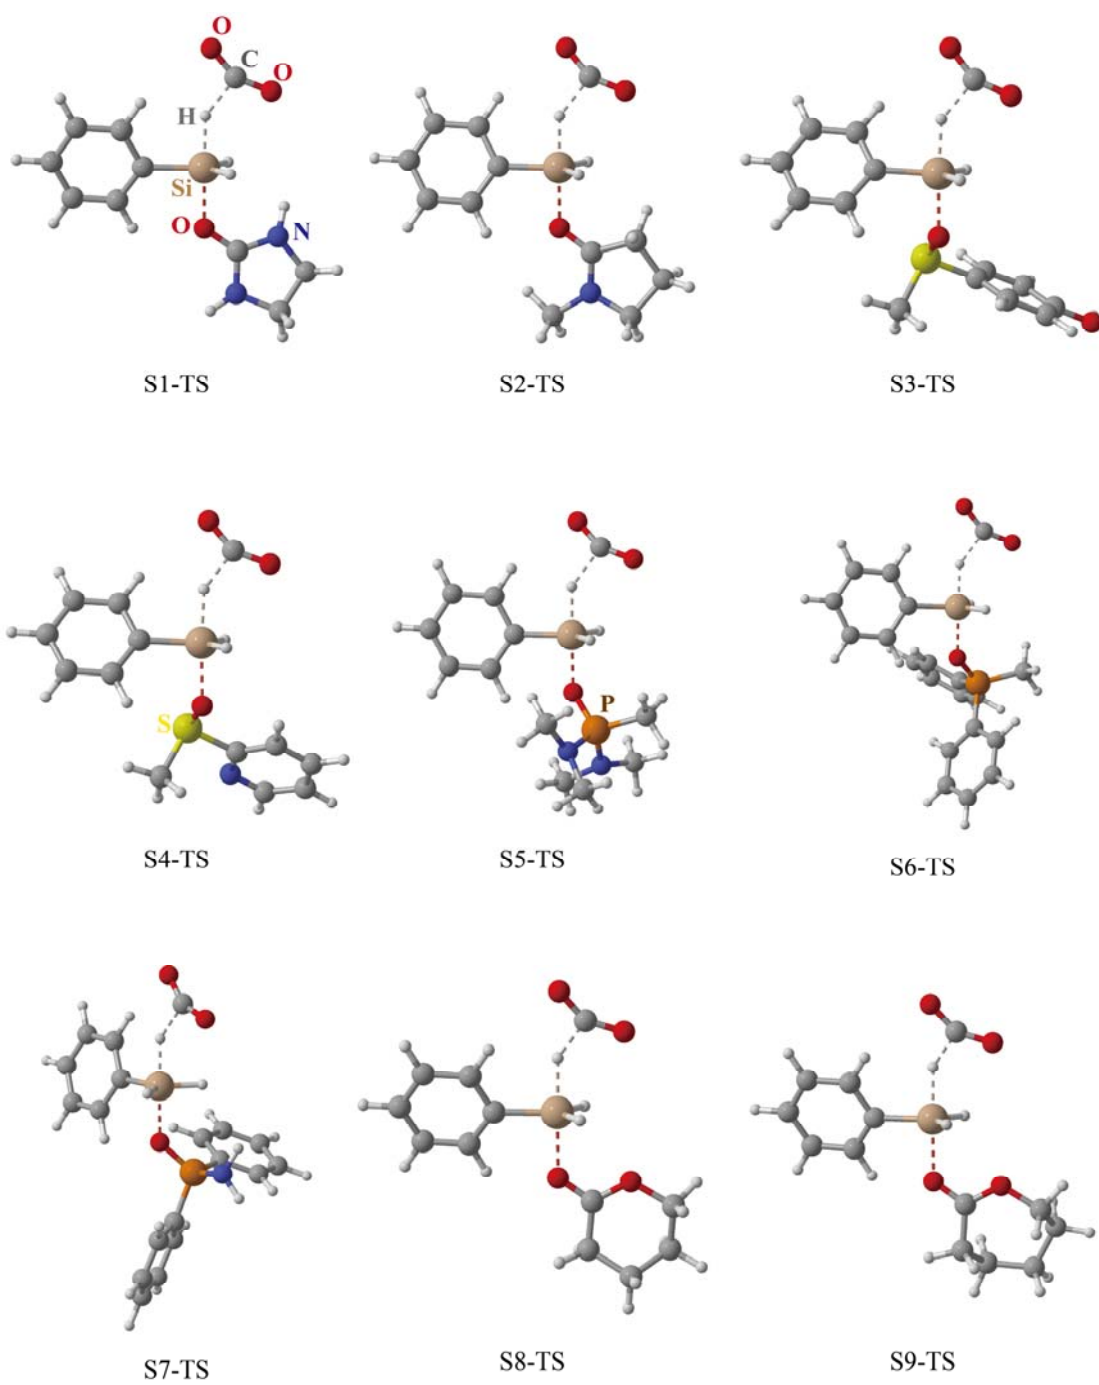

**Figure S13.** Optimized intermediates and transition states of CO<sub>2</sub> reduction by phenylsilane in other commercial solvents.



**Table S1.** Detailed information of other commercial solvents.

|             | <b>S1</b>                  | <b>S2</b>                           | <b>S3</b>                     |
|-------------|----------------------------|-------------------------------------|-------------------------------|
| <b>name</b> | 2-imidazolidinone          | N-methylpyrrolidone                 | 4-(methylsulphonyl)phenol     |
| <b>CAS</b>  | 120-93-4                   | 872-50-4                            | 14763-64-5                    |
|             | <b>S4</b>                  | <b>S5</b>                           | <b>S6</b>                     |
| <b>name</b> | 2-(methylsulfinyl)pyridine | methylphosphonic bis(dimethylamide) | Methyldiphenylphosphine oxide |
| <b>CAS</b>  | 21948-75-4                 | 2511-17-3                           | 2129-89-7                     |
|             | <b>S7</b>                  | <b>S8</b>                           | <b>S9</b>                     |
| <b>name</b> | diphenylphosphinamide      | $\delta$ -valerolactone             | $\epsilon$ -caprolactone      |
| <b>CAS</b>  | 5994-87-6                  | 542-28-9                            | <b>502-44-3</b>               |

**Table S2.** Free energies of all species (a.u.).

| Species                | Free energies | Species                    | Free energies |
|------------------------|---------------|----------------------------|---------------|
| <b>CO<sub>2</sub></b>  | -188.6009305  | <b>carbamate-TS2</b>       | -1553.516302  |
| <b>Si</b>              | -522.8178165  | <b>carbamate-TS3</b>       | -1553.526023  |
| <b>DMF</b>             | -248.4279319  | <b>DEA</b>                 | -366.2828573  |
| <b>IM<sub>1</sub></b>  | -771.2374214  | <b>DEA-CO<sub>2</sub></b>  | -188.6011139  |
| <b>TS<sub>1</sub></b>  | -959.80771    | <b>DEA-Si</b>              | -522.8182704  |
| <b>IM<sub>2</sub></b>  | -959.8663547  | <b>DEA-TS</b>              | -1077.661763  |
| <b>IM<sub>3</sub></b>  | -711.4394603  | <b>DEF</b>                 | -326.9948105  |
| <b>TS<sub>2</sub></b>  | -1148.432181  | <b>DEF-CO<sub>2</sub></b>  | -188.6009305  |
| <b>IM<sub>4</sub></b>  | -1148.488317  | <b>DEF-Si</b>              | -522.81815    |
| <b>TS<sub>3</sub></b>  | -1337.058997  | <b>DEF-TS</b>              | -1038.375442  |
| <b>IM<sub>5</sub></b>  | -1337.108077  | <b>DMAc</b>                | -287.7163119  |
| <b>IM<sub>6</sub></b>  | -1088.692546  | <b>DMAc-CO<sub>2</sub></b> | -188.6011139  |
| <b>TS<sub>4</sub></b>  | -1415.440406  | <b>DMAc-Si</b>             | -522.8182704  |
| <b>IM<sub>7</sub></b>  | -1415.447391  | <b>DMAc-TS</b>             | -999.0960535  |
| <b>TS<sub>5</sub></b>  | -1742.218178  | <b>DMSO</b>                | -553.1442859  |
| <b>IM<sub>8</sub></b>  | -1742.217506  | <b>DMSO-CO<sub>2</sub></b> | -188.6007722  |
| <b>TS<sub>6</sub></b>  | -1742.20849   | <b>DMSO-Si</b>             | -522.816468   |
| <b>IM<sub>9</sub></b>  | -975.3669104  | <b>DMSO-TS</b>             | -1264.525647  |
| <b>TS<sub>4a</sub></b> | -1302.106017  | <b>THF</b>                 | -232.3431659  |
| <b>IM<sub>7a</sub></b> | -1302.108325  | <b>THF-CO<sub>2</sub></b>  | -188.6003331  |
| <b>TS<sub>5a</sub></b> | -1628.890181  | <b>THF-Si</b>              | -522.8185848  |
| <b>IM<sub>8a</sub></b> | -1628.890622  | <b>THF-TS</b>              | -943.7131069  |
| <b>TS<sub>6a</sub></b> | -1628.879803  | <b>Amide</b>               | -440.1153146  |
| <b>IM<sub>9a</sub></b> | -862.0407393  | <b>Amide-TS</b>            | -1151.492583  |
| <b>TS<sub>4b</sub></b> | -1188.776163  | <b>MBO</b>                 | -271.649419   |
| <b>IM<sub>7b</sub></b> | -1188.777079  | <b>MBO-CO<sub>2</sub></b>  | -188.6008894  |
| <b>TS<sub>5b</sub></b> | -1515.549652  | <b>MBO-Si</b>              | -522.8195829  |
| <b>IM<sub>8b</sub></b> | -1515.550846  | <b>MBO-TS</b>              | -983.0176205  |

|                         |              |                           |              |
|-------------------------|--------------|---------------------------|--------------|
| <b>TS<sub>6b</sub></b>  | -1515.537835 | <b>Dioxane</b>            | -307.5592068 |
| <b>IM<sub>9b</sub></b>  | -748.7095188 | <b>Dioxane-TS</b>         | -1018.928264 |
| <b>TS<sub>7</sub></b>   | -1859.893755 | <b>GLV</b>                | -345.7120903 |
| <b>IM<sub>10</sub></b>  | -1859.950596 | <b>GLV-CO<sub>2</sub></b> | -188.5977195 |
| <b>TS<sub>8</sub></b>   | -1611.494574 | <b>GLV-Si</b>             | -522.814939  |
| <b>IM<sub>11</sub></b>  | -1497.052876 | <b>GLV-TS</b>             | -1057.079594 |
| <b>TS<sub>9a</sub></b>  | -517.6712136 | <b>S1</b>                 | -302.6148064 |
| <b>TS<sub>9</sub></b>   | -768.0119626 | <b>S1-TS</b>              | -1013.9937   |
| <b>IM<sub>12</sub></b>  | -441.2790761 | <b>S2</b>                 | -325.8239513 |
| <b>TS<sub>10</sub></b>  | -1938.316589 | <b>S2-TS</b>              | -1037.202849 |
| <b>IM<sub>13</sub></b>  | -1938.315914 | <b>S3</b>                 | -820.0638572 |
| <b>TS<sub>11</sub></b>  | -1938.303857 | <b>S3-TS</b>              | -1531.443232 |
| <b>IM<sub>14</sub></b>  | -1938.308091 | <b>S4</b>                 | -760.8837154 |
| <b>TS<sub>12</sub></b>  | -1938.299301 | <b>S4-TS</b>              | -1472.25992  |
| <b>IM<sub>15</sub></b>  | -1938.309993 | <b>S5</b>                 | -725.5079148 |
| <b>TS<sub>13</sub></b>  | -1938.308823 | <b>S5-TS</b>              | -1436.891528 |
| <b>IM<sub>16</sub></b>  | -1572.350153 | <b>S6</b>                 | -919.6265811 |
| <b>IM<sub>17</sub></b>  | -2265.098422 | <b>S6-TS</b>              | -1631.007992 |
| <b>TS<sub>14</sub></b>  | -2265.096540 | <b>S7</b>                 | -935.707871  |
| <b>IM<sub>18</sub></b>  | -2265.094919 | <b>S7-TS</b>              | -1647.088348 |
| <b>aminal</b>           | -691.6286769 | <b>S8</b>                 | -345.7023705 |
| <b>Aniline-TS</b>       | -1038.150645 | <b>S8-TS</b>              | -1057.072656 |
| <b>carbamic acid-TS</b> | -1226.737219 | <b>S9</b>                 | -384.9827813 |
| <b>carbamate-TS1</b>    | -1226.305225 | <b>S9-TS</b>              | -1096.353003 |

**Table S3.** Imaginary frequencies of all transition states.

| <b>Species</b>         | <b>Imaginary frequency</b> | <b>Species</b>          | <b>Imaginary frequency</b> |
|------------------------|----------------------------|-------------------------|----------------------------|
| <b>TS<sub>1</sub></b>  | 466.75 cm <sup>-1</sup>    | <b>carbamic acid-TS</b> | 268.42 cm <sup>-1</sup>    |
| <b>TS<sub>2</sub></b>  | 320.10 cm <sup>-1</sup>    | <b>carbamate-TS1</b>    | 440.11 cm <sup>-1</sup>    |
| <b>TS<sub>3</sub></b>  | 221.61 cm <sup>-1</sup>    | <b>carbamate-TS2</b>    | 492.91 cm <sup>-1</sup>    |
| <b>TS<sub>4</sub></b>  | 172.51 cm <sup>-1</sup>    | <b>carbamate-TS3</b>    | 514.38 cm <sup>-1</sup>    |
| <b>TS<sub>5</sub></b>  | 789.56 cm <sup>-1</sup>    | <b>DEA-TS</b>           | 445.89 cm <sup>-1</sup>    |
| <b>TS<sub>6</sub></b>  | 298.81 cm <sup>-1</sup>    | <b>DEF-TS</b>           | 430.95 cm <sup>-1</sup>    |
| <b>TS<sub>4a</sub></b> | 236.42 cm <sup>-1</sup>    | <b>DMAc-TS</b>          | 447.79 cm <sup>-1</sup>    |
| <b>TS<sub>5a</sub></b> | 814.48 cm <sup>-1</sup>    | <b>DMSO-TS</b>          | 450.34 cm <sup>-1</sup>    |
| <b>TS<sub>6a</sub></b> | 286.75 cm <sup>-1</sup>    | <b>THF-TS</b>           | 32.64 cm <sup>-1</sup>     |
| <b>TS<sub>4b</sub></b> | 214.04 cm <sup>-1</sup>    | <b>Amide-TS</b>         | 393.20 cm <sup>-1</sup>    |
| <b>TS<sub>5b</sub></b> | 811.37 cm <sup>-1</sup>    | <b>MBO-TS</b>           | 216.83 cm <sup>-1</sup>    |
| <b>TS<sub>6b</sub></b> | 290.93 cm <sup>-1</sup>    | <b>Dioxane-TS</b>       | 172.79 cm <sup>-1</sup>    |
| <b>TS<sub>7</sub></b>  | 451.30 cm <sup>-1</sup>    | <b>GLV-TS</b>           | 325.05 cm <sup>-1</sup>    |
| <b>TS<sub>8</sub></b>  | 327.84 cm <sup>-1</sup>    | <b>S1-TS</b>            | 429.19 cm <sup>-1</sup>    |
| <b>TS<sub>9a</sub></b> | 1022.88 cm <sup>-1</sup>   | <b>S2-TS</b>            | 443.01 cm <sup>-1</sup>    |
| <b>TS<sub>9</sub></b>  | 622.26 cm <sup>-1</sup>    | <b>S3-TS</b>            | 438.11 cm <sup>-1</sup>    |
| <b>TS<sub>10</sub></b> | 67.93 cm <sup>-1</sup>     | <b>S4-TS</b>            | 422.93 cm <sup>-1</sup>    |
| <b>TS<sub>11</sub></b> | 179.24 cm <sup>-1</sup>    | <b>S5-TS</b>            | 448.12 cm <sup>-1</sup>    |
| <b>TS<sub>12</sub></b> | 83.32 cm <sup>-1</sup>     | <b>S6-TS</b>            | 447.86 cm <sup>-1</sup>    |
| <b>TS<sub>13</sub></b> | 287.71 cm <sup>-1</sup>    | <b>S7-TS</b>            | 447.49 cm <sup>-1</sup>    |
| <b>TS<sub>14</sub></b> | 466.18 cm <sup>-1</sup>    | <b>S8-TS</b>            | 374.42 cm <sup>-1</sup>    |
| <b>Aniline-TS</b>      | 370.16 cm <sup>-1</sup>    | <b>S9-TS</b>            | 361.95 cm <sup>-1</sup>    |

**Table S4.** Cartesian coordinates of all species (angstroms).

| <b>IM<sub>1</sub></b> |           |           |           |                       |           |           |           |
|-----------------------|-----------|-----------|-----------|-----------------------|-----------|-----------|-----------|
| Symbol                | X         | Y         | Z         | Symbol                | X         | Y         | Z         |
| C                     | -1.376459 | 0.527884  | 0.739396  | H                     | -5.136526 | -0.275724 | -1.258574 |
| H                     | -0.715837 | -0.258360 | 1.136122  | H                     | -4.566209 | 1.329875  | -0.747595 |
| O                     | -1.086717 | 1.710295  | 0.824054  | Si                    | 0.617876  | -1.438882 | -0.185630 |
| N                     | -2.484646 | 0.031937  | 0.158761  | H                     | 4.254635  | -2.029166 | -0.460379 |
| C                     | -3.458953 | 0.908330  | -0.464812 | H                     | 0.622182  | -2.270687 | 1.028750  |
| H                     | -3.541874 | 0.680711  | -1.530808 | H                     | 0.044187  | -1.941215 | -1.451062 |
| H                     | -4.438826 | 0.772078  | -0.000504 | C                     | 0.864287  | 0.434946  | -0.056977 |
| H                     | -3.133460 | 1.937071  | -0.335227 | C                     | 1.771810  | 1.071016  | -0.915573 |
| C                     | -2.734511 | -1.394521 | 0.083657  | C                     | 0.187371  | 1.231317  | 0.877105  |
| H                     | -1.949722 | -1.930684 | 0.615749  | C                     | 1.983870  | 2.445847  | -0.857145 |
| H                     | -3.699771 | -1.633334 | 0.536936  | H                     | 2.324986  | 0.486108  | -1.643475 |
| H                     | -2.744110 | -1.727356 | -0.958176 | C                     | 0.412334  | 2.603297  | 0.956494  |
| Si                    | 2.057578  | 2.097629  | -0.095845 | H                     | -0.522925 | 0.777059  | 1.559677  |
| H                     | 3.419994  | 2.338376  | -0.633669 | C                     | 1.306758  | 3.215938  | 0.083742  |
| H                     | 1.091401  | 2.814805  | -0.953663 | H                     | 2.682278  | 2.913966  | -1.541931 |
| H                     | 2.015622  | 2.613220  | 1.291423  | H                     | -0.114257 | 3.193968  | 1.697902  |
| C                     | 1.670560  | 0.260915  | -0.091791 | H                     | 1.476390  | 4.285394  | 0.137692  |
| C                     | 1.984423  | -0.549624 | 1.006396  | C                     | 3.323174  | -1.723172 | 0.041994  |
| C                     | 1.000144  | -0.324768 | -1.174124 | O                     | 2.277760  | -1.858166 | -0.737843 |
| C                     | 1.632178  | -1.897761 | 1.026808  | O                     | 3.311810  | -1.320907 | 1.181226  |
| H                     | 2.511051  | -0.131479 | 1.858599  | <b>IM<sub>3</sub></b> |           |           |           |
| C                     | 0.649394  | -1.671017 | -1.160315 | Symbol                | X         | Y         | Z         |
| H                     | 0.728590  | 0.280964  | -2.033398 | Si                    | -1.244067 | 1.103761  | -0.541661 |
| C                     | 0.961031  | -2.459254 | -0.055317 | H                     | -3.272639 | -1.778437 | 0.220310  |
| H                     | 1.880706  | -2.508425 | 1.886981  | H                     | -1.635975 | 2.043657  | 0.523525  |
| H                     | 0.125388  | -2.103062 | -2.005198 | H                     | -1.397205 | 1.714453  | -1.872912 |
| H                     | 0.681446  | -3.506221 | -0.037770 | C                     | 0.466882  | 0.429292  | -0.246377 |
| <b>IM<sub>2</sub></b> |           |           |           | C                     | 0.865176  | -0.785233 | -0.820551 |
| Symbol                | X         | Y         | Z         | C                     | 1.385642  | 1.134278  | 0.540322  |
| C                     | -2.144918 | -0.624685 | -0.443023 | C                     | 2.148692  | -1.280210 | -0.614676 |
| H                     | -1.837777 | -0.401028 | -1.470612 | H                     | 0.170730  | -1.355713 | -1.430597 |
| O                     | -1.355329 | -1.177405 | 0.355379  | C                     | 2.672242  | 0.642503  | 0.743061  |
| N                     | -3.373052 | -0.272777 | -0.134825 | H                     | 1.098711  | 2.072394  | 1.006124  |
| C                     | -3.922883 | -0.490251 | 1.196266  | C                     | 3.053557  | -0.564879 | 0.165796  |
| H                     | -4.237165 | 0.467918  | 1.614257  | H                     | 2.443334  | -2.222553 | -1.062264 |
| H                     | -4.789466 | -1.150437 | 1.125265  | H                     | 3.373379  | 1.198016  | 1.355371  |
| H                     | -3.165830 | -0.941547 | 1.831284  | H                     | 4.054046  | -0.950397 | 0.326026  |
| C                     | -4.254227 | 0.349970  | -1.112850 | C                     | -2.581936 | -0.958244 | 0.448756  |
| H                     | -3.729479 | 0.464431  | -2.059440 | O                     | -2.346270 | -0.201453 | -0.624653 |
|                       |           |           |           | O                     | -2.100953 | -0.762045 | 1.529784  |
|                       |           |           |           | <b>IM<sub>4</sub></b> |           |           |           |

| Symbol | X         | Y         | Z         |
|--------|-----------|-----------|-----------|
| C      | 2.474257  | -0.239896 | -0.385524 |
| H      | 2.658547  | -1.301309 | -0.206073 |
| O      | 1.330767  | 0.182525  | -0.688985 |
| N      | 3.517169  | 0.545134  | -0.271367 |
| C      | 3.426505  | 1.984873  | -0.477312 |
| H      | 3.806083  | 2.492683  | 0.411047  |
| H      | 4.037743  | 2.263942  | -1.338076 |
| H      | 2.391202  | 2.265403  | -0.651332 |
| C      | 4.833448  | 0.015628  | 0.058111  |
| H      | 4.776179  | -1.064360 | 0.183560  |
| H      | 5.529713  | 0.253386  | -0.748156 |
| H      | 5.185433  | 0.474434  | 0.983742  |
| Si     | -0.344546 | -0.831175 | -0.906965 |
| H      | 0.806698  | -2.959590 | 1.815760  |
| H      | -3.422781 | -2.862658 | -0.666424 |
| H      | 0.053778  | -0.961077 | -2.313685 |
| C      | -1.257280 | 0.696465  | -0.284252 |
| C      | -2.527420 | 0.979730  | -0.807407 |
| C      | -0.724445 | 1.592329  | 0.652864  |
| C      | -3.233461 | 2.116869  | -0.421200 |
| H      | -2.978154 | 0.306671  | -1.528905 |
| C      | -1.435420 | 2.717433  | 1.058726  |
| H      | 0.248437  | 1.393751  | 1.083775  |
| C      | -2.690038 | 2.987166  | 0.517516  |
| H      | -4.209046 | 2.317568  | -0.850160 |
| H      | -1.007966 | 3.387838  | 1.796474  |
| H      | -3.240213 | 3.868817  | 0.827488  |
| C      | 0.593991  | -1.971422 | 1.385089  |
| O      | 0.326644  | -2.063079 | 0.091084  |
| O      | 0.626738  | -0.953414 | 2.022155  |
| C      | -2.577770 | -2.282154 | -0.262973 |
| O      | -1.802137 | -1.822155 | -1.215929 |
| O      | -2.425035 | -2.114668 | 0.923545  |

**IM<sub>5</sub>**

| Symbol | X        | Y         | Z         |
|--------|----------|-----------|-----------|
| C      | 2.337610 | -0.795275 | -1.185260 |
| H      | 2.352117 | -1.713678 | -1.765676 |
| O      | 1.316122 | -0.023830 | -1.305342 |
| N      | 3.381912 | -0.515573 | -0.476839 |
| C      | 3.534806 | 0.715095  | 0.298469  |
| H      | 3.413785 | 0.489046  | 1.358361  |
| H      | 4.539314 | 1.095705  | 0.114969  |

|    |           |           |           |
|----|-----------|-----------|-----------|
| H  | 2.797009  | 1.450639  | -0.008565 |
| C  | 4.482717  | -1.473896 | -0.370935 |
| H  | 4.263733  | -2.356792 | -0.966958 |
| H  | 5.399119  | -0.999165 | -0.721094 |
| H  | 4.592441  | -1.754229 | 0.677675  |
| Si | 0.041518  | 0.528722  | -0.248971 |
| H  | 0.435112  | 3.386593  | 1.960981  |
| H  | 1.319985  | -1.796325 | 2.371987  |
| H  | -1.652086 | 2.726839  | -2.668324 |
| C  | -1.525996 | -0.503759 | -0.116326 |
| C  | -2.230860 | -0.871736 | -1.269743 |
| C  | -2.011402 | -0.951060 | 1.119660  |
| C  | -3.369922 | -1.669670 | -1.194221 |
| H  | -1.888444 | -0.536108 | -2.242733 |
| C  | -3.162421 | -1.727743 | 1.202291  |
| H  | -1.492906 | -0.667379 | 2.028659  |
| C  | -3.841553 | -2.095375 | 0.043384  |
| H  | -3.891427 | -1.953249 | -2.101693 |
| H  | -3.528638 | -2.049227 | 2.171073  |
| H  | -4.733927 | -2.708211 | 0.105303  |
| C  | -0.018313 | 2.426519  | 1.678415  |
| O  | 0.435842  | 2.018662  | 0.502589  |
| O  | -0.821399 | 1.850923  | 2.358861  |
| C  | -1.467439 | 2.292436  | -1.672901 |
| O  | -2.115517 | 2.610281  | -0.704972 |
| O  | -0.488599 | 1.421008  | -1.701371 |
| C  | 1.049786  | -1.553066 | 1.332897  |
| O  | 0.838336  | -0.273017 | 1.164772  |
| O  | 0.988961  | -2.400849 | 0.470084  |

**IM<sub>6</sub>**

| Symbol | X         | Y         | Z         |
|--------|-----------|-----------|-----------|
| Si     | -0.877759 | -0.077347 | 0.030184  |
| H      | -1.955437 | -0.860520 | -3.305071 |
| H      | -1.296285 | -2.851515 | 2.275022  |
| H      | -2.550126 | 2.920897  | 1.119756  |
| C      | 0.946419  | 0.133187  | -0.031734 |
| C      | 1.553161  | 1.395130  | -0.004411 |
| C      | 1.756531  | -1.010984 | -0.073533 |
| C      | 2.939483  | 1.509313  | -0.027609 |
| H      | 0.950616  | 2.295307  | 0.030066  |
| C      | 3.140748  | -0.893398 | -0.096053 |
| H      | 1.308285  | -1.999172 | -0.091446 |
| C      | 3.732228  | 0.367126  | -0.074724 |

|   |           |           |           |
|---|-----------|-----------|-----------|
| H | 3.398858  | 2.490627  | -0.006983 |
| H | 3.757342  | -1.784043 | -0.128109 |
| H | 4.812328  | 0.458346  | -0.092625 |
| C | -1.348570 | -1.018239 | -2.407353 |
| O | -1.662267 | -0.131267 | -1.447095 |
| O | -0.514526 | -1.865510 | -2.282123 |
| C | -1.882436 | 2.371446  | 0.447905  |
| O | -1.369093 | 2.825583  | -0.531704 |
| O | -1.706926 | 1.106762  | 0.868527  |
| C | -0.956816 | -1.842049 | 2.018471  |
| O | -1.314851 | -1.515495 | 0.762067  |
| O | -0.352417 | -1.114258 | 2.748164  |

### IM<sub>7a</sub>

| Symbol | X         | Y         | Z         |
|--------|-----------|-----------|-----------|
| Si     | -1.141739 | -0.829221 | -0.336424 |
| H      | -0.454168 | -2.647702 | 2.750506  |
| H      | 1.257601  | 0.495639  | -2.056389 |
| C      | -2.492131 | 0.486374  | -0.222195 |
| C      | -2.284147 | 1.818737  | -0.604720 |
| C      | -3.777223 | 0.130345  | 0.218308  |
| C      | -3.315923 | 2.754000  | -0.563287 |
| H      | -1.298805 | 2.126376  | -0.932979 |
| C      | -4.806590 | 1.064261  | 0.281379  |
| H      | -3.963135 | -0.887767 | 0.541369  |
| C      | -4.579231 | 2.379373  | -0.116693 |
| H      | -3.131336 | 3.776586  | -0.873912 |
| H      | -5.786409 | 0.766761  | 0.638578  |
| H      | -5.381597 | 3.107777  | -0.075293 |
| C      | -1.093818 | -2.016272 | 2.117480  |
| O      | -0.431032 | -1.566634 | 1.064548  |
| O      | -2.235698 | -1.761224 | 2.389490  |
| C      | 0.838712  | -0.130955 | -1.259843 |
| O      | 0.229951  | 0.475931  | -0.244142 |
| O      | -0.045986 | -1.093044 | -1.674588 |
| O      | -2.119193 | -2.168180 | -0.678953 |
| N      | 2.120885  | -0.909641 | -0.711333 |
| H      | 1.736092  | -1.518027 | 0.021146  |
| C      | 2.711399  | -1.767333 | -1.772953 |
| H      | 1.983024  | -2.534647 | -2.019644 |
| H      | 2.912455  | -1.156272 | -2.650963 |
| H      | 3.631029  | -2.212299 | -1.399060 |
| C      | 3.050649  | 0.018935  | -0.076088 |
| C      | 3.945337  | 0.749815  | -0.846380 |

|   |           |           |           |
|---|-----------|-----------|-----------|
| C | 2.972156  | 0.185624  | 1.300126  |
| C | 4.787439  | 1.658975  | -0.212989 |
| H | 3.994401  | 0.619013  | -1.920190 |
| C | 3.822017  | 1.092597  | 1.921485  |
| H | 2.254263  | -0.389322 | 1.874006  |
| C | 4.729611  | 1.829865  | 1.166211  |
| H | 5.491383  | 2.232109  | -0.804204 |
| H | 3.771369  | 1.222773  | 2.995722  |
| H | 5.391356  | 2.536900  | 1.652192  |
| H | -2.908127 | -1.965894 | -1.186309 |

### IM<sub>7b</sub>

| Symbol | X         | Y         | Z         |
|--------|-----------|-----------|-----------|
| Si     | 1.214731  | 0.977440  | 0.361133  |
| H      | -1.035932 | 0.387425  | -1.921439 |
| C      | 2.656930  | -0.194972 | -0.025856 |
| C      | 2.486165  | -1.445931 | -0.639029 |
| C      | 3.965968  | 0.165385  | 0.335538  |
| C      | 3.565280  | -2.291169 | -0.885942 |
| H      | 1.489019  | -1.757027 | -0.923715 |
| C      | 5.049136  | -0.677482 | 0.100538  |
| H      | 4.137962  | 1.123509  | 0.812338  |
| C      | 4.851446  | -1.910107 | -0.514672 |
| H      | 3.401534  | -3.249750 | -1.366463 |
| H      | 6.046834  | -0.371302 | 0.395943  |
| H      | 5.692550  | -2.568187 | -0.703082 |
| O      | 0.502032  | 0.963309  | 1.884705  |
| C      | -0.649193 | 0.651159  | -0.928577 |
| O      | -0.077445 | -0.299032 | -0.202037 |
| O      | 0.213822  | 1.710379  | -0.889521 |
| O      | 2.112214  | 2.398434  | 0.664421  |
| N      | -1.984031 | 1.145052  | -0.158907 |
| H      | -1.621516 | 1.413912  | 0.764105  |
| C      | -2.558484 | 2.346955  | -0.812812 |
| H      | -1.839833 | 3.154899  | -0.706015 |
| H      | -2.716202 | 2.136357  | -1.869405 |
| H      | -3.501025 | 2.602174  | -0.331763 |
| C      | -2.904228 | 0.031724  | 0.030883  |
| C      | -3.821408 | -0.303165 | -0.956024 |
| C      | -2.788432 | -0.715253 | 1.197748  |
| C      | -4.650494 | -1.404263 | -0.754987 |
| H      | -3.900441 | 0.275756  | -1.867862 |
| C      | -3.623919 | -1.807866 | 1.388176  |
| H      | -2.044355 | -0.438048 | 1.936583  |

|   |           |           |           |
|---|-----------|-----------|-----------|
| C | -4.556095 | -2.153455 | 0.412401  |
| H | -5.371890 | -1.671776 | -1.517626 |
| H | -3.544332 | -2.390653 | 2.298063  |
| H | -5.207908 | -3.005731 | 0.563599  |
| H | 2.593771  | 2.746054  | -0.090283 |
| H | 0.883656  | 1.651518  | 2.439274  |

|   |           |           |           |
|---|-----------|-----------|-----------|
| C | -4.397951 | -1.787711 | 1.124117  |
| H | -2.807863 | -0.588509 | 1.954299  |
| C | -5.202789 | -2.018933 | 0.013091  |
| H | -5.679612 | -1.415608 | -1.995972 |
| H | -4.507286 | -2.394423 | 2.014776  |
| H | -5.944216 | -2.808527 | 0.036057  |

**IM<sub>7</sub>**

| Symbol | X         | Y         | Z         |
|--------|-----------|-----------|-----------|
| Si     | 0.935388  | 0.590790  | 0.144627  |
| H      | 0.429346  | 1.011215  | 3.735135  |
| H      | 3.407129  | 3.276459  | -0.212047 |
| H      | -1.473676 | 0.447278  | -1.939769 |
| C      | 2.239605  | -0.709313 | -0.231587 |
| C      | 1.938072  | -1.850553 | -0.986136 |
| C      | 3.554693  | -0.566820 | 0.238420  |
| C      | 2.911208  | -2.806703 | -1.272595 |
| H      | 0.929358  | -1.991613 | -1.353794 |
| C      | 4.525734  | -1.523294 | -0.033854 |
| H      | 3.814673  | 0.294978  | 0.842007  |
| C      | 4.207009  | -2.645594 | -0.795933 |
| H      | 2.654318  | -3.677032 | -1.866218 |
| H      | 5.533140  | -1.394292 | 0.346593  |
| H      | 4.965599  | -3.389303 | -1.014044 |
| C      | 1.058638  | 0.729522  | 2.879650  |
| O      | 0.347717  | 0.694703  | 1.759211  |
| O      | 2.224763  | 0.468203  | 2.979073  |
| C      | -1.060032 | 0.594549  | -0.937036 |
| O      | -0.484714 | -0.467546 | -0.346941 |
| O      | -0.108726 | 1.579317  | -0.839437 |
| C      | 2.778372  | 2.445967  | -0.568530 |
| O      | 2.035692  | 1.952458  | 0.394525  |
| O      | 2.800576  | 2.065774  | -1.713558 |
| N      | -2.295026 | 1.046324  | -0.074313 |
| H      | -1.912651 | 1.139870  | 0.875225  |
| C      | -2.794563 | 2.381719  | -0.509276 |
| H      | -2.010095 | 3.107994  | -0.316434 |
| H      | -3.013906 | 2.345204  | -1.574560 |
| H      | -3.691721 | 2.618744  | 0.057989  |
| C      | -3.317892 | -0.000663 | -0.046365 |
| C      | -4.109717 | -0.218491 | -1.166801 |
| C      | -3.444706 | -0.775820 | 1.097088  |
| C      | -5.056045 | -1.236839 | -1.128444 |
| H      | -3.997147 | 0.389349  | -2.056428 |

**IM<sub>8a</sub>**

| Symbol | X         | Y         | Z         |
|--------|-----------|-----------|-----------|
| Si     | -1.931696 | -0.527675 | 0.454295  |
| H      | -4.763635 | -2.815561 | 1.185461  |
| H      | -0.283762 | -0.954498 | -2.050288 |
| C      | -3.105191 | 0.777917  | -0.238304 |
| C      | -2.742704 | 1.562947  | -1.340596 |
| C      | -4.359061 | 1.021837  | 0.342667  |
| C      | -3.597902 | 2.536347  | -1.854408 |
| H      | -1.772702 | 1.410707  | -1.800774 |
| C      | -5.209983 | 2.006281  | -0.149665 |
| H      | -4.680680 | 0.433541  | 1.196561  |
| C      | -4.832859 | 2.763781  | -1.256363 |
| H      | -3.296673 | 3.121158  | -2.716777 |
| H      | -6.169652 | 2.179448  | 0.325096  |
| H      | -5.497801 | 3.525702  | -1.647873 |
| O      | -1.361378 | -0.192965 | 2.015808  |
| C      | -0.225041 | -1.077198 | -0.958212 |
| O      | -0.417940 | 0.120358  | -0.281611 |
| O      | -1.291263 | -1.833856 | -0.473088 |
| C      | -4.133693 | -2.208325 | 0.514390  |
| O      | -3.188620 | -1.586510 | 1.177868  |
| O      | -4.338336 | -2.153345 | -0.672824 |
| N      | 1.080656  | -1.688112 | -0.613789 |
| H      | 1.332299  | -0.999723 | 1.082252  |
| C      | 1.096385  | -3.148057 | -0.505233 |
| H      | 0.151121  | -3.469267 | -0.079238 |
| H      | 1.240378  | -3.632580 | -1.478577 |
| H      | 1.899104  | -3.459993 | 0.164597  |
| C      | 2.194662  | -1.093482 | -1.252011 |
| C      | 3.404445  | -1.790418 | -1.391899 |
| C      | 2.137286  | 0.236234  | -1.710803 |
| C      | 4.521280  | -1.167950 | -1.942968 |
| H      | 3.490332  | -2.817988 | -1.066454 |
| C      | 3.256750  | 0.837816  | -2.269941 |
| H      | 1.228556  | 0.810561  | -1.591545 |
| C      | 4.461607  | 0.147958  | -2.385153 |



|   |           |           |           |
|---|-----------|-----------|-----------|
| H | 5.444586  | -1.730022 | -2.029906 |
| H | 3.184508  | 1.865548  | -2.609128 |
| H | 5.333385  | 0.626408  | -2.815221 |
| N | 1.383891  | -0.384555 | 1.933130  |
| H | 0.398874  | -0.071558 | 2.046464  |
| C | 1.769865  | -1.180882 | 3.126936  |
| H | 1.016806  | -1.954620 | 3.267197  |
| H | 2.741886  | -1.639190 | 2.962460  |
| H | 1.801542  | -0.520698 | 3.991527  |
| C | 2.244960  | 0.753013  | 1.618152  |
| C | 3.607646  | 0.551874  | 1.440357  |
| C | 1.661719  | 1.998167  | 1.441795  |
| C | 4.402943  | 1.632173  | 1.076557  |
| H | 4.040365  | -0.434767 | 1.561491  |
| C | 2.467431  | 3.072354  | 1.075409  |
| H | 0.591806  | 2.117754  | 1.569195  |
| C | 3.834503  | 2.890663  | 0.891858  |
| H | 5.466085  | 1.486106  | 0.926642  |
| H | 2.022324  | 4.049466  | 0.930868  |
| H | 4.457891  | 3.728503  | 0.602741  |
| H | -1.935022 | -0.526058 | 2.713108  |

### IM<sub>8b</sub>

| Symbol | X         | Y         | Z         |
|--------|-----------|-----------|-----------|
| Si     | -2.134957 | -0.862771 | 0.529954  |
| H      | -0.614841 | -0.752798 | -2.107607 |
| C      | -3.435832 | 0.335970  | -0.156427 |
| C      | -3.085339 | 1.447721  | -0.937998 |
| C      | -4.802499 | 0.136626  | 0.094656  |
| C      | -4.048560 | 2.316751  | -1.446073 |
| H      | -2.037178 | 1.628953  | -1.148643 |
| C      | -5.772747 | 1.001837  | -0.405684 |
| H      | -5.105964 | -0.715456 | 0.692907  |
| C      | -5.397088 | 2.096252  | -1.179829 |
| H      | -3.747848 | 3.166897  | -2.049175 |
| H      | -6.821302 | 0.821667  | -0.193815 |
| H      | -6.149306 | 2.771136  | -1.573413 |
| O      | -1.550851 | -0.449439 | 2.087245  |
| C      | -0.477022 | -1.061211 | -1.058533 |
| O      | -0.680205 | -0.020776 | -0.168190 |
| O      | -1.455979 | -1.960533 | -0.655233 |
| O      | -3.155445 | -2.067179 | 1.198311  |
| N      | 0.884969  | -1.633318 | -0.903082 |
| H      | 1.154833  | -1.199383 | 0.944582  |

|   |           |           |           |
|---|-----------|-----------|-----------|
| C | 0.993995  | -3.080504 | -1.086310 |
| H | 0.084661  | -3.539406 | -0.711236 |
| H | 1.132615  | -3.353783 | -2.139891 |
| H | 1.836824  | -3.467560 | -0.511615 |
| C | 1.924751  | -0.852375 | -1.451697 |
| C | 3.177592  | -1.417582 | -1.739911 |
| C | 1.755416  | 0.527876  | -1.676713 |
| C | 4.224237  | -0.626669 | -2.205737 |
| H | 3.350417  | -2.475419 | -1.595736 |
| C | 2.806496  | 1.300076  | -2.152713 |
| H | 0.813277  | 1.002000  | -1.437882 |
| C | 4.053028  | 0.736350  | -2.415936 |
| H | 5.181743  | -1.092880 | -2.410790 |
| H | 2.646662  | 2.361455  | -2.309933 |
| H | 4.870613  | 1.346868  | -2.780255 |
| N | 1.179865  | -0.694916 | 1.860443  |
| H | 0.179774  | -0.437608 | 2.018525  |
| C | 1.615523  | -1.607726 | 2.948782  |
| H | 0.908739  | -2.435098 | 2.991537  |
| H | 2.612927  | -1.984123 | 2.734472  |
| H | 1.610804  | -1.056321 | 3.887053  |
| C | 1.980929  | 0.514968  | 1.688090  |
| C | 3.343645  | 0.405377  | 1.443617  |
| C | 1.339536  | 1.743478  | 1.716417  |
| C | 4.080020  | 1.563622  | 1.223699  |
| H | 3.820041  | -0.567758 | 1.405234  |
| C | 2.086630  | 2.896651  | 1.493500  |
| H | 0.270313  | 1.788952  | 1.889688  |
| C | 3.452906  | 2.807808  | 1.246381  |
| H | 5.142392  | 1.491688  | 1.023016  |
| H | 1.596399  | 3.862687  | 1.509244  |
| H | 4.030368  | 3.707318  | 1.068453  |
| H | -2.054197 | -0.894084 | 2.776952  |
| H | -3.431080 | -2.729868 | 0.560886  |

### IM<sub>8</sub>

| Symbol | X        | Y         | Z         |
|--------|----------|-----------|-----------|
| Si     | 1.904322 | 0.112743  | 0.514963  |
| H      | 1.583842 | -3.203615 | 2.053809  |
| H      | 4.662611 | 0.909240  | 2.827935  |
| H      | 0.077087 | 2.313420  | -0.443621 |
| C      | 3.040782 | 0.075979  | -0.981900 |
| C      | 2.596412 | 0.538169  | -2.227636 |
| C      | 4.361810 | -0.387983 | -0.893085 |

|   |           |           |           |
|---|-----------|-----------|-----------|
| C | 3.437437  | 0.548743  | -3.339637 |
| H | 1.576107  | 0.891015  | -2.329361 |
| C | 5.201044  | -0.395198 | -2.001662 |
| H | 4.728908  | -0.766934 | 0.054074  |
| C | 4.741500  | 0.079299  | -3.228993 |
| H | 3.071830  | 0.918945  | -4.291186 |
| H | 6.215809  | -0.766918 | -1.910067 |
| H | 5.397077  | 0.080001  | -4.092889 |
| C | 2.150323  | -2.492433 | 1.434601  |
| O | 1.394729  | -1.449291 | 1.095700  |
| O | 3.283332  | -2.679795 | 1.094749  |
| C | 0.081858  | 1.470400  | 0.262090  |
| O | 0.339718  | 0.258350  | -0.371413 |
| O | 1.164313  | 1.539703  | 1.135662  |
| C | 4.022601  | 1.103810  | 1.952028  |
| O | 3.136317  | 0.149616  | 1.790289  |
| O | 4.166686  | 2.080704  | 1.260044  |
| N | -1.209183 | 1.449036  | 0.990521  |
| H | -1.393372 | -0.361180 | 1.259985  |
| C | -1.210280 | 2.080782  | 2.311075  |
| H | -0.283291 | 1.827534  | 2.815434  |
| H | -1.301606 | 3.171939  | 2.249111  |
| H | -2.042242 | 1.690170  | 2.898845  |
| C | -2.339063 | 1.697376  | 0.172537  |
| C | -3.507162 | 2.273789  | 0.690510  |
| C | -2.331167 | 1.304735  | -1.178502 |
| C | -4.637322 | 2.420155  | -0.109844 |
| H | -3.552455 | 2.604516  | 1.718867  |
| C | -3.463164 | 1.465548  | -1.965783 |
| H | -1.449668 | 0.838033  | -1.598835 |
| C | -4.629543 | 2.016490  | -1.439120 |
| H | -5.529791 | 2.861762  | 0.319528  |
| H | -3.432431 | 1.145024  | -3.001406 |
| H | -5.512782 | 2.131205  | -2.056048 |
| N | -1.443613 | -1.404483 | 1.126387  |
| H | -0.552561 | -1.614476 | 0.657059  |
| C | -1.473413 | -2.098215 | 2.442262  |
| H | -0.599277 | -1.779925 | 3.007425  |
| H | -2.383389 | -1.818445 | 2.968166  |
| H | -1.449382 | -3.172297 | 2.268199  |
| C | -2.566751 | -1.700986 | 0.239370  |
| C | -3.837444 | -1.274044 | 0.603371  |
| C | -2.326729 | -2.349216 | -0.960815 |
| C | -4.893807 | -1.498908 | -0.270407 |

|   |           |           |           |
|---|-----------|-----------|-----------|
| H | -3.991164 | -0.755120 | 1.543767  |
| C | -3.393408 | -2.570585 | -1.828383 |
| H | -1.320991 | -2.663417 | -1.218298 |
| C | -4.671959 | -2.144307 | -1.486065 |
| H | -5.888607 | -1.161215 | -0.005296 |
| H | -3.219138 | -3.072132 | -2.772637 |
| H | -5.498134 | -2.312103 | -2.166720 |

### IM<sub>9a</sub>

| Symbol | X         | Y         | Z         |
|--------|-----------|-----------|-----------|
| Si     | -0.857327 | 0.047287  | 0.612596  |
| H      | -2.186688 | -2.002086 | -2.037197 |
| C      | 0.953512  | 0.105878  | 0.262754  |
| C      | 1.549023  | 1.272608  | -0.235070 |
| C      | 1.757261  | -1.021704 | 0.477796  |
| C      | 2.911827  | 1.310275  | -0.511850 |
| H      | 0.946347  | 2.159570  | -0.400540 |
| C      | 3.119490  | -0.985294 | 0.199261  |
| H      | 1.321815  | -1.937443 | 0.864625  |
| C      | 3.696589  | 0.180861  | -0.295810 |
| H      | 3.361530  | 2.219771  | -0.893265 |
| H      | 3.730398  | -1.864020 | 0.370817  |
| H      | 4.758817  | 0.210138  | -0.510748 |
| C      | -1.649519 | -1.797901 | -1.104502 |
| O      | -1.691371 | -0.512631 | -0.770854 |
| O      | -1.087212 | -2.642047 | -0.454610 |
| O      | -1.378353 | 1.568771  | 0.861099  |
| O      | -1.278074 | -0.913416 | 1.869423  |
| H      | -1.228772 | -1.860611 | 1.696853  |
| H      | -2.318841 | 1.723883  | 0.998241  |

### IM<sub>9b</sub>

| Symbol | X         | Y         | Z         |
|--------|-----------|-----------|-----------|
| Si     | -0.966643 | -0.064369 | 0.603688  |
| C      | 0.862087  | 0.036034  | 0.272783  |
| C      | 1.466027  | 1.251870  | -0.073454 |
| C      | 1.667026  | -1.109962 | 0.343687  |
| C      | 2.828133  | 1.321065  | -0.349768 |
| H      | 0.870925  | 2.158604  | -0.122188 |
| C      | 3.029345  | -1.044963 | 0.068027  |
| H      | 1.230024  | -2.065314 | 0.619446  |
| C      | 3.610268  | 0.171533  | -0.280125 |
| H      | 3.279942  | 2.270135  | -0.615029 |
| H      | 3.637876  | -1.940163 | 0.127502  |

|   |           |           |           |
|---|-----------|-----------|-----------|
| H | 4.671955  | 0.224056  | -0.493561 |
| O | -1.811498 | -0.589483 | -0.706134 |
| O | -1.583559 | 1.405427  | 1.000794  |
| O | -1.250221 | -1.107061 | 1.842072  |
| H | -0.656059 | -1.060771 | 2.597480  |
| H | -1.737466 | 2.033225  | 0.288365  |
| H | -1.449110 | -1.337542 | -1.190965 |

**IM<sub>9</sub>**

| Symbol | X         | Y         | Z         |
|--------|-----------|-----------|-----------|
| Si     | -1.429893 | -0.764116 | -0.514939 |
| H      | -0.287098 | -2.121722 | 2.615800  |
| H      | 1.248805  | 1.272201  | -1.825788 |
| C      | -2.871345 | 0.339785  | -0.184313 |
| C      | -2.842269 | 1.696365  | -0.535933 |
| C      | -4.051162 | -0.188557 | 0.362299  |
| C      | -3.954099 | 2.506319  | -0.330532 |
| H      | -1.952134 | 2.134230  | -0.973126 |
| C      | -5.161816 | 0.622160  | 0.566355  |
| H      | -4.098571 | -1.235105 | 0.640694  |
| C      | -5.112867 | 1.970308  | 0.222656  |
| H      | -3.915958 | 3.554064  | -0.604994 |
| H      | -6.065299 | 0.201951  | 0.992683  |
| H      | -5.978897 | 2.602332  | 0.383265  |
| C      | -1.048430 | -1.910199 | 1.857256  |
| O      | -0.527709 | -1.242461 | 0.820340  |
| O      | -2.198486 | -2.232250 | 1.940785  |
| C      | 0.515980  | 1.011157  | -1.054033 |
| O      | 0.428335  | 1.550278  | 0.010338  |
| O      | -0.277505 | 0.010299  | -1.462415 |
| O      | -1.825139 | -2.139749 | -1.292646 |
| H      | -2.580654 | -2.128963 | -1.889904 |

***N*-methylaniline**

| Symbol | X         | Y         | Z         |
|--------|-----------|-----------|-----------|
| N      | 1.784437  | -0.619777 | -0.151182 |
| H      | 2.000147  | -1.545703 | 0.186787  |
| C      | 2.811886  | 0.371725  | 0.105128  |
| H      | 3.781653  | -0.122426 | 0.092446  |
| H      | 2.814261  | 1.132504  | -0.679032 |
| H      | 2.684011  | 0.875350  | 1.072010  |
| C      | 0.445175  | -0.283127 | -0.058834 |
| C      | 0.013574  | 1.051748  | -0.054921 |
| C      | -0.527467 | -1.298584 | -0.005554 |

|   |           |           |           |
|---|-----------|-----------|-----------|
| C | -1.346110 | 1.349928  | -0.011594 |
| H | 0.734281  | 1.858583  | -0.087220 |
| C | -1.875856 | -0.986064 | 0.042838  |
| H | -0.206067 | -2.335153 | -0.005750 |
| C | -2.301858 | 0.342982  | 0.037903  |
| H | -1.655133 | 2.389406  | -0.011617 |
| H | -2.603287 | -1.788897 | 0.086156  |
| H | -3.356985 | 0.583124  | 0.074699  |

***N*-methylformanilide**

| Symbol | X         | Y         | Z         |
|--------|-----------|-----------|-----------|
| H      | 3.329301  | -0.188904 | -0.060125 |
| C      | 2.305381  | -0.582896 | -0.143198 |
| O      | 2.086575  | -1.739341 | -0.433945 |
| N      | 1.375122  | 0.384667  | 0.113828  |
| C      | 1.847189  | 1.751027  | 0.329739  |
| H      | 1.299091  | 2.203393  | 1.156219  |
| H      | 2.904101  | 1.721778  | 0.586838  |
| H      | 1.724145  | 2.366225  | -0.563989 |
| C      | -0.024907 | 0.152728  | 0.050098  |
| C      | -0.880319 | 1.213263  | -0.265562 |
| C      | -0.575094 | -1.102883 | 0.335967  |
| C      | -2.256540 | 1.019361  | -0.306002 |
| H      | -0.479683 | 2.193872  | -0.484810 |
| C      | -1.951865 | -1.282147 | 0.289857  |
| H      | 0.069400  | -1.928591 | 0.592207  |
| C      | -2.802103 | -0.228718 | -0.032214 |
| H      | -2.899852 | 1.854736  | -0.555365 |
| H      | -2.361344 | -2.259768 | 0.515774  |
| H      | -3.874059 | -0.379086 | -0.064097 |

***N,N*-dimethylaniline**

| Symbol | X         | Y         | Z         |
|--------|-----------|-----------|-----------|
| H      | -3.279182 | -1.846695 | -2.696745 |
| H      | -2.718421 | -0.459974 | -3.654618 |
| C      | -2.590994 | -0.990486 | -2.712931 |
| N      | -2.832188 | -0.065479 | -1.618634 |
| C      | -3.698138 | 1.069704  | -1.887586 |
| H      | -3.365309 | 1.952552  | -1.337439 |
| H      | -3.648453 | 1.304300  | -2.949213 |
| H      | -4.745119 | 0.871206  | -1.620102 |
| C      | -2.745843 | -0.538272 | -0.324027 |
| C      | -3.240169 | 0.210950  | 0.765793  |
| C      | -2.152353 | -1.786897 | -0.037329 |

|   |           |           |           |
|---|-----------|-----------|-----------|
| C | -3.116938 | -0.258414 | 2.067271  |
| H | -3.723536 | 1.163952  | 0.599374  |
| C | -2.038893 | -2.238064 | 1.271413  |
| H | -1.776457 | -2.409716 | -0.837576 |
| C | -2.513905 | -1.483003 | 2.340054  |
| H | -3.506820 | 0.346435  | 2.879007  |
| H | -1.574271 | -3.201414 | 1.452652  |
| H | -2.423932 | -1.843070 | 3.357632  |
| H | -1.568123 | -1.372490 | -2.682896 |

**formaldehyde**

| Symbol | X         | Y         | Z         |
|--------|-----------|-----------|-----------|
| C      | 0.174807  | 0.258987  | -0.000000 |
| H      | 0.699248  | -0.710814 | -0.000000 |
| H      | -0.927268 | 0.228128  | -0.000000 |
| O      | 0.774997  | 1.299326  | 0.000000  |

**IM<sub>10</sub>**

| Symbol | X         | Y         | Z         |
|--------|-----------|-----------|-----------|
| C      | -4.427452 | -0.971521 | -0.431943 |
| H      | -4.397879 | -0.404614 | -1.367034 |
| O      | -3.362757 | -1.336157 | 0.132954  |
| N      | -5.619500 | -1.237863 | 0.037688  |
| C      | -5.813099 | -1.977610 | 1.278917  |
| H      | -6.375723 | -1.356085 | 1.977718  |
| H      | -6.382164 | -2.884580 | 1.067234  |
| H      | -4.847853 | -2.235590 | 1.704614  |
| C      | -6.826019 | -0.810597 | -0.659475 |
| H      | -6.556215 | -0.265537 | -1.561936 |
| H      | -7.418517 | -1.687938 | -0.923834 |
| H      | -7.410969 | -0.165745 | -0.001845 |
| Si     | -1.597932 | -0.751188 | -0.526755 |
| H      | 0.320191  | -1.546884 | -2.870374 |
| H      | -1.069717 | -1.646795 | 0.513578  |
| H      | -2.018666 | -1.219907 | -1.867408 |
| C      | -1.981929 | 1.037352  | -0.064958 |
| C      | -1.558706 | 2.086384  | -0.889389 |
| C      | -2.665258 | 1.364677  | 1.114951  |
| C      | -1.814507 | 3.414447  | -0.557056 |
| H      | -1.003844 | 1.868502  | -1.796369 |
| C      | -2.899435 | 2.690617  | 1.466981  |
| H      | -3.013288 | 0.575439  | 1.774280  |
| C      | -2.478515 | 3.719117  | 0.626914  |
| H      | -1.481391 | 4.209860  | -1.214317 |

|    |           |           |           |
|----|-----------|-----------|-----------|
| H  | -3.414041 | 2.921933  | 2.393019  |
| H  | -2.667428 | 4.752573  | 0.895119  |
| Si | 1.869253  | -0.499571 | -0.423584 |
| H  | 0.363120  | 0.236662  | -3.132933 |
| H  | 1.493073  | -3.696676 | 1.290667  |
| H  | 0.720761  | 2.338303  | 1.472930  |
| C  | 3.699303  | -0.197784 | -0.064718 |
| C  | 4.667096  | -0.347140 | -1.068262 |
| C  | 4.144089  | 0.158044  | 1.217253  |
| C  | 6.021278  | -0.151751 | -0.805762 |
| H  | 4.354423  | -0.612670 | -2.071821 |
| C  | 5.495451  | 0.356292  | 1.486136  |
| H  | 3.422088  | 0.269353  | 2.018182  |
| C  | 6.438921  | 0.201203  | 0.473781  |
| H  | 6.749342  | -0.271390 | -1.600732 |
| H  | 5.813213  | 0.631996  | 2.485885  |
| H  | 7.492052  | 0.356340  | 0.680903  |
| C  | 0.630475  | -0.581565 | -2.459186 |
| O  | 0.090424  | -0.376602 | -1.161753 |
| O  | 1.988511  | -0.557734 | -2.123795 |
| C  | 1.172301  | 1.784947  | 0.639062  |
| O  | 1.594889  | 2.312264  | -0.361696 |
| O  | 1.214607  | 0.486916  | 0.858032  |
| C  | 1.737885  | -2.625863 | 1.293244  |
| O  | 1.578187  | -2.104876 | 0.083162  |
| O  | 2.098160  | -2.034609 | 2.272656  |

**IM<sub>11</sub>**

| Symbol | X         | Y         | Z         |
|--------|-----------|-----------|-----------|
| Si     | -1.343225 | 1.480423  | -1.246753 |
| H      | -1.193178 | 1.786709  | -2.682214 |
| H      | -1.533002 | 2.715144  | -0.460603 |
| C      | -2.776350 | 0.306215  | -1.030444 |
| C      | -3.220411 | -0.080878 | 0.243373  |
| C      | -3.439013 | -0.206351 | -2.153172 |
| C      | -4.290847 | -0.956572 | 0.386548  |
| H      | -2.723715 | 0.304339  | 1.128029  |
| C      | -4.513690 | -1.081371 | -2.011498 |
| H      | -3.116918 | 0.077203  | -3.150693 |
| C      | -4.938204 | -1.457488 | -0.741551 |
| H      | -4.623229 | -1.247937 | 1.376614  |
| H      | -5.016493 | -1.468574 | -2.890387 |
| H      | -5.773805 | -2.139138 | -0.628695 |
| Si     | 0.847173  | 0.016834  | 0.445625  |

|   |           |           |           |
|---|-----------|-----------|-----------|
| H | -1.202749 | -2.287365 | 2.343559  |
| H | 0.615421  | 2.214088  | 3.283529  |
| C | 2.446608  | -0.713443 | -0.077858 |
| C | 2.881584  | -0.620611 | -1.404844 |
| C | 3.243394  | -1.391210 | 0.856075  |
| C | 4.091013  | -1.190288 | -1.790886 |
| H | 2.275557  | -0.099619 | -2.138630 |
| C | 4.451022  | -1.959759 | 0.468833  |
| H | 2.920711  | -1.475423 | 1.889674  |
| C | 4.873970  | -1.858666 | -0.854641 |
| H | 4.421291  | -1.112924 | -2.820187 |
| H | 5.062042  | -2.480910 | 1.196566  |
| H | 5.816173  | -2.302325 | -1.155842 |
| O | 0.088790  | 0.775044  | -0.757717 |
| C | 0.207747  | 1.634236  | 2.448797  |
| O | -0.963434 | 1.510971  | 2.215928  |
| O | 1.174098  | 1.081480  | 1.710650  |
| C | -0.315385 | -1.652201 | 2.239314  |
| O | -0.224528 | -1.154053 | 1.001403  |
| O | 0.471391  | -1.436644 | 3.116172  |

### IM<sub>12</sub>

| Symbol | X         | Y         | Z         |
|--------|-----------|-----------|-----------|
| N      | -0.759605 | -0.997755 | -0.552538 |
| C      | 0.496882  | -0.442081 | -0.309989 |
| C      | 1.492664  | -1.176313 | 0.361498  |
| C      | 0.827768  | 0.861523  | -0.734534 |
| C      | 2.758195  | -0.640013 | 0.570637  |
| H      | 1.286081  | -2.175222 | 0.720641  |
| C      | 2.095934  | 1.382882  | -0.515156 |
| H      | 0.102944  | 1.482665  | -1.245012 |
| C      | 3.077458  | 0.641692  | 0.136566  |
| H      | 3.499897  | -1.238933 | 1.087839  |
| H      | 2.312015  | 2.389073  | -0.857281 |
| H      | 4.063276  | 1.056648  | 0.307177  |
| C      | -1.137512 | -2.180340 | 0.210385  |
| H      | -1.064136 | -2.019013 | 1.292850  |
| H      | -2.167605 | -2.434653 | -0.035299 |
| H      | -0.509958 | -3.032854 | -0.056721 |
| C      | -1.841787 | -0.118568 | -0.918563 |
| H      | -2.686628 | -0.734676 | -1.220249 |
| O      | -2.309699 | 0.693491  | 0.144258  |
| H      | -1.542386 | 0.489117  | -1.774572 |
| H      | -1.620227 | 1.334164  | 0.351588  |

### IM<sub>13</sub>

| Symbol | X         | Y         | Z         |
|--------|-----------|-----------|-----------|
| C      | -2.775588 | 1.677440  | 0.792780  |
| H      | -3.161391 | 1.141428  | -0.084138 |
| O      | -1.486004 | 1.432865  | 1.080679  |
| Si     | -0.327058 | 0.627966  | 0.163250  |
| H      | -1.827391 | 1.421087  | -3.107285 |
| C      | 1.150872  | 1.651677  | -0.302295 |
| C      | 1.992000  | 1.212241  | -1.328792 |
| C      | 1.437017  | 2.870425  | 0.325526  |
| C      | 3.107094  | 1.959178  | -1.703813 |
| H      | 1.787715  | 0.275140  | -1.839244 |
| C      | 2.540021  | 3.625914  | -0.057918 |
| H      | 0.787489  | 3.247816  | 1.110904  |
| C      | 3.381297  | 3.166640  | -1.069757 |
| H      | 3.758558  | 1.597227  | -2.491647 |
| H      | 2.744132  | 4.571656  | 0.431188  |
| H      | 4.244825  | 3.752117  | -1.364577 |
| O      | -0.279450 | -1.006322 | 0.248646  |
| C      | -1.535639 | 1.674700  | -2.078933 |
| O      | -1.599126 | 2.792499  | -1.634039 |
| O      | -1.131198 | 0.611201  | -1.407293 |
| N      | 2.694072  | -0.654037 | 1.788303  |
| C      | 2.936470  | -1.499099 | 0.701406  |
| C      | 2.192810  | -2.674379 | 0.485362  |
| C      | 3.981908  | -1.216607 | -0.193533 |
| C      | 2.461061  | -3.497091 | -0.598270 |
| H      | 1.398194  | -2.957285 | 1.161556  |
| C      | 4.246872  | -2.057400 | -1.271690 |
| H      | 4.582985  | -0.325819 | -0.070561 |
| C      | 3.487278  | -3.198278 | -1.494355 |
| H      | 1.862065  | -4.391309 | -0.735782 |
| H      | 5.056902  | -1.801746 | -1.946188 |
| H      | 3.692279  | -3.846726 | -2.337407 |
| C      | 3.584749  | 0.472950  | 2.018934  |
| H      | 3.525210  | 1.221837  | 1.220446  |
| H      | 3.308626  | 0.949385  | 2.961045  |
| H      | 4.619386  | 0.132235  | 2.103148  |
| C      | 1.461049  | -0.627259 | 2.490880  |
| H      | 1.638526  | -0.460234 | 3.553446  |
| O      | 0.559982  | 0.439509  | 2.071673  |
| H      | 0.895757  | -1.538597 | 2.349252  |
| H      | 0.813344  | 1.274147  | 2.490120  |

|    |           |           |           |
|----|-----------|-----------|-----------|
| Si | -1.201189 | -2.194255 | -0.465046 |
| H  | -0.842994 | -2.379115 | -1.886088 |
| H  | -0.936820 | -3.428470 | 0.302952  |
| C  | -2.991835 | -1.678960 | -0.299941 |
| C  | -3.746851 | -1.264286 | -1.404048 |
| C  | -3.561145 | -1.567595 | 0.976523  |
| C  | -5.031321 | -0.752105 | -1.238923 |
| H  | -3.324719 | -1.324883 | -2.402530 |
| C  | -4.842679 | -1.050778 | 1.146822  |
| H  | -2.997771 | -1.875751 | 1.853540  |
| C  | -5.577524 | -0.640985 | 0.037595  |
| H  | -5.602575 | -0.433460 | -2.103545 |
| H  | -5.264703 | -0.962932 | 2.141527  |
| H  | -6.573953 | -0.234088 | 0.167428  |
| O  | -3.443479 | 2.400823  | 1.468848  |

#### IM<sub>14</sub>

| Symbol | X         | Y         | Z         |
|--------|-----------|-----------|-----------|
| C      | 2.865626  | -1.899199 | 0.564466  |
| H      | 3.095384  | -1.167957 | -0.220558 |
| O      | 1.649399  | -1.800554 | 1.086528  |
| Si     | 0.239157  | -0.897893 | 0.647223  |
| H      | 1.492339  | -1.048841 | -2.943270 |
| C      | -1.252229 | -1.798916 | -0.128110 |
| C      | -1.755039 | -1.481774 | -1.398688 |
| C      | -1.917847 | -2.810035 | 0.581547  |
| C      | -2.861951 | -2.136521 | -1.934928 |
| H      | -1.278514 | -0.703519 | -1.985465 |
| C      | -3.004510 | -3.495046 | 0.041678  |
| H      | -1.584289 | -3.077830 | 1.577844  |
| C      | -3.484954 | -3.155864 | -1.219622 |
| H      | -3.232732 | -1.855403 | -2.914981 |
| H      | -3.480696 | -4.286768 | 0.609908  |
| H      | -4.336932 | -3.678305 | -1.640384 |
| O      | 0.194018  | 0.777245  | 0.762884  |
| C      | 1.287597  | -1.496465 | -1.954734 |
| O      | 1.389498  | -2.690598 | -1.773320 |
| O      | 0.954480  | -0.602453 | -1.069588 |
| N      | -3.049234 | 0.695823  | 1.333418  |
| C      | -2.783829 | 1.783886  | 0.418973  |
| C      | -2.296972 | 2.988113  | 0.917744  |
| C      | -3.059737 | 1.626974  | -0.935610 |
| C      | -2.055535 | 4.037543  | 0.040254  |
| H      | -2.128943 | 3.116473  | 1.980408  |

|    |           |           |           |
|----|-----------|-----------|-----------|
| C  | -2.812790 | 2.686297  | -1.802571 |
| H  | -3.454701 | 0.696965  | -1.322010 |
| C  | -2.309141 | 3.889384  | -1.320223 |
| H  | -1.677799 | 4.976159  | 0.427334  |
| H  | -3.019928 | 2.564182  | -2.858845 |
| H  | -2.122902 | 4.712453  | -1.999672 |
| C  | -4.202209 | -0.174020 | 1.039317  |
| H  | -3.963220 | -0.806500 | 0.184640  |
| H  | -4.396603 | -0.792136 | 1.911626  |
| H  | -5.061248 | 0.456020  | 0.814870  |
| C  | -2.322759 | 0.491595  | 2.368320  |
| H  | -2.611064 | -0.285930 | 3.061163  |
| O  | -0.316551 | -1.030264 | 2.279832  |
| H  | -1.453381 | 1.106671  | 2.548028  |
| H  | -0.084012 | -1.857542 | 2.707986  |
| Si | 0.995837  | 1.975596  | -0.037726 |
| H  | 0.460454  | 2.237640  | -1.392931 |
| H  | 0.838747  | 3.195863  | 0.789329  |
| C  | 2.825104  | 1.571384  | -0.132266 |
| C  | 3.470033  | 1.320091  | -1.349233 |
| C  | 3.556159  | 1.404971  | 1.051172  |
| C  | 4.800250  | 0.911209  | -1.384925 |
| H  | 2.922326  | 1.425641  | -2.281089 |
| C  | 4.884570  | 0.986312  | 1.023196  |
| H  | 3.083189  | 1.589916  | 2.012380  |
| C  | 5.507180  | 0.737832  | -0.196554 |
| H  | 5.283974  | 0.718319  | -2.336160 |
| H  | 5.430907  | 0.851251  | 1.950022  |
| H  | 6.539782  | 0.408348  | -0.222342 |
| O  | 3.670716  | -2.700914 | 0.956175  |

#### IM<sub>15</sub>

| Symbol | X        | Y         | Z         |
|--------|----------|-----------|-----------|
| C      | 1.393857 | -0.605425 | 2.265475  |
| H      | 2.040102 | 0.259257  | 2.072175  |
| O      | 1.241452 | -1.443180 | 1.227095  |
| Si     | 1.709369 | -1.285332 | -0.383074 |
| H      | 1.820518 | 3.170800  | -0.359563 |
| C      | 3.409453 | -0.542097 | -0.440681 |
| C      | 3.775636 | 0.320239  | -1.482176 |
| C      | 4.346166 | -0.808771 | 0.565331  |
| C      | 5.038305 | 0.901954  | -1.515833 |
| H      | 3.067589 | 0.547930  | -2.273768 |
| C      | 5.611946 | -0.228707 | 0.534523  |

|    |           |           |           |
|----|-----------|-----------|-----------|
| H  | 4.091847  | -1.469099 | 1.390127  |
| C  | 5.957403  | 0.628866  | -0.504932 |
| H  | 5.305506  | 1.570571  | -2.326323 |
| H  | 6.324132  | -0.441374 | 1.323622  |
| H  | 6.940352  | 1.085629  | -0.527323 |
| O  | 0.606609  | -0.530239 | -1.305501 |
| C  | 1.844488  | 2.376062  | 0.409736  |
| O  | 2.511217  | 2.509673  | 1.415780  |
| O  | 1.122207  | 1.332617  | 0.139395  |
| N  | -3.084566 | -1.320680 | -1.732629 |
| C  | -2.989748 | -1.401618 | -0.289672 |
| C  | -1.879481 | -1.995485 | 0.309265  |
| C  | -4.013367 | -0.859387 | 0.482031  |
| C  | -1.782984 | -2.006135 | 1.694109  |
| H  | -1.103608 | -2.466612 | -0.281822 |
| C  | -3.906127 | -0.886989 | 1.868083  |
| H  | -4.878513 | -0.398561 | 0.026307  |
| C  | -2.789896 | -1.447479 | 2.475989  |
| H  | -0.905530 | -2.434769 | 2.159113  |
| H  | -4.696977 | -0.451340 | 2.466968  |
| H  | -2.703534 | -1.455653 | 3.556071  |
| C  | -4.416442 | -1.096951 | -2.324335 |
| H  | -4.728757 | -0.074236 | -2.113780 |
| H  | -4.343067 | -1.249440 | -3.396979 |
| H  | -5.117164 | -1.803931 | -1.884820 |
| C  | -2.054889 | -1.394002 | -2.490514 |
| H  | -2.199616 | -1.343427 | -3.562448 |
| O  | 1.662208  | -2.837457 | -0.935648 |
| H  | -1.062750 | -1.520740 | -2.074181 |
| H  | 2.198782  | -3.485402 | -0.468141 |
| Si | 0.035594  | 1.081413  | -1.406651 |
| H  | 0.851659  | 2.132407  | -2.087722 |
| H  | -0.775314 | 0.715989  | -2.668841 |
| C  | -1.512088 | 1.666182  | -0.457990 |
| C  | -2.666671 | 1.964758  | -1.197738 |
| C  | -1.569948 | 1.866891  | 0.930654  |
| C  | -3.813108 | 2.476358  | -0.594227 |
| H  | -2.668180 | 1.799569  | -2.272154 |
| C  | -2.720242 | 2.358494  | 1.544979  |
| H  | -0.703915 | 1.639754  | 1.542538  |
| C  | -3.841541 | 2.675383  | 0.783324  |
| H  | -4.683383 | 2.714897  | -1.196756 |
| H  | -2.739082 | 2.497972  | 2.620684  |
| H  | -4.732564 | 3.068589  | 1.260567  |

|   |          |           |          |
|---|----------|-----------|----------|
| O | 0.861261 | -0.816665 | 3.317456 |
|---|----------|-----------|----------|

### IM<sub>16</sub>

| Symbol | X         | Y         | Z         |
|--------|-----------|-----------|-----------|
| C      | 1.950881  | -0.477083 | 2.374582  |
| H      | 2.846603  | 0.069505  | 2.053431  |
| O      | 1.385460  | -1.244048 | 1.418162  |
| Si     | 1.614876  | -1.245259 | -0.245726 |
| H      | 2.748687  | 2.926446  | -0.647669 |
| C      | 3.361415  | -0.764361 | -0.620852 |
| C      | 3.628751  | 0.110431  | -1.683157 |
| C      | 4.432959  | -1.221186 | 0.159200  |
| C      | 4.928745  | 0.525688  | -1.952969 |
| H      | 2.817751  | 0.474126  | -2.308117 |
| C      | 5.733325  | -0.808350 | -0.111193 |
| H      | 4.258770  | -1.899308 | 0.990078  |
| C      | 5.980380  | 0.068228  | -1.164325 |
| H      | 5.119733  | 1.206457  | -2.774421 |
| H      | 6.552182  | -1.165159 | 0.502575  |
| H      | 6.993202  | 0.395646  | -1.369516 |
| O      | 0.588290  | -0.146342 | -0.896278 |
| C      | 2.676232  | 2.444281  | 0.338142  |
| O      | 3.542901  | 2.474430  | 1.157696  |
| O      | 1.502823  | 1.826223  | 0.566975  |
| O      | 1.116364  | -2.696468 | -0.790094 |
| H      | 1.610278  | -3.481549 | -0.530338 |
| Si     | 0.277540  | 1.431815  | -0.536644 |
| H      | 0.407105  | 2.283502  | -1.726885 |
| C      | -1.332654 | 1.602366  | 0.344255  |
| C      | -2.246195 | 2.596770  | -0.022963 |
| C      | -1.653060 | 0.740533  | 1.403493  |
| C      | -3.454537 | 2.731227  | 0.654801  |
| H      | -2.018366 | 3.270901  | -0.842932 |
| C      | -2.857457 | 0.878578  | 2.082714  |
| H      | -0.962334 | -0.042530 | 1.704183  |
| C      | -3.758017 | 1.873502  | 1.707136  |
| H      | -4.157489 | 3.501859  | 0.360803  |
| H      | -3.095850 | 0.211518  | 2.902950  |
| H      | -4.698658 | 1.977862  | 2.235765  |
| O      | 1.503302  | -0.428040 | 3.478477  |

### IM<sub>17</sub>

| Symbol | X        | Y        | Z        |
|--------|----------|----------|----------|
| C      | 4.183393 | 0.430196 | 1.546055 |

|    |           |           |           |
|----|-----------|-----------|-----------|
| H  | 4.595820  | -0.252938 | 0.794139  |
| O  | 2.871834  | 0.642745  | 1.463651  |
| Si | 1.628653  | -0.107076 | 0.542518  |
| H  | 3.690739  | -3.257979 | 0.337053  |
| C  | 0.362691  | -1.347858 | 1.202573  |
| C  | -0.037931 | -2.443194 | 0.424873  |
| C  | -0.235428 | -1.184611 | 2.458652  |
| C  | -1.015849 | -3.328658 | 0.873295  |
| H  | 0.418125  | -2.607062 | -0.547424 |
| C  | -1.186338 | -2.087396 | 2.929531  |
| H  | 0.042350  | -0.336485 | 3.075921  |
| C  | -1.588634 | -3.154991 | 2.131435  |
| H  | -1.328245 | -4.155400 | 0.244387  |
| H  | -1.623042 | -1.951064 | 3.912972  |
| H  | -2.341410 | -3.849535 | 2.487415  |
| O  | 1.596060  | 0.310693  | -1.078100 |
| C  | 3.258157  | -2.392899 | 0.867135  |
| O  | 3.295947  | -2.305690 | 2.075317  |
| O  | 2.744306  | -1.516193 | 0.051225  |
| O  | 0.555271  | 1.211427  | 1.013553  |
| H  | 0.964455  | 2.079693  | 0.930393  |
| Si | 2.578916  | -0.043706 | -2.356346 |
| H  | 2.411575  | -1.430879 | -2.843240 |
| H  | 2.187250  | 0.896980  | -3.432713 |
| C  | 4.371089  | 0.245910  | -1.898697 |
| C  | 5.281918  | -0.812873 | -1.800598 |
| C  | 4.799668  | 1.527283  | -1.527832 |
| C  | 6.579510  | -0.601118 | -1.342890 |
| H  | 4.970491  | -1.818686 | -2.066258 |
| C  | 6.093598  | 1.743595  | -1.060765 |
| H  | 4.114844  | 2.369131  | -1.589573 |
| C  | 6.983950  | 0.677815  | -0.966445 |
| H  | 7.272276  | -1.432229 | -1.270556 |
| H  | 6.404830  | 2.739437  | -0.765828 |
| H  | 7.990563  | 0.842291  | -0.598694 |
| O  | 4.865772  | 0.978319  | 2.367643  |
| H  | -2.286067 | -0.818317 | 0.645771  |
| H  | -2.753399 | 0.497471  | 1.737700  |
| C  | -2.777401 | 0.150302  | 0.704667  |
| N  | -4.106219 | 0.126346  | 0.200654  |
| C  | -5.079324 | 0.996889  | 0.858299  |
| H  | -5.721298 | 0.429917  | 1.541560  |
| H  | -4.549713 | 1.757583  | 1.428250  |
| H  | -5.706735 | 1.504279  | 0.122478  |

|   |           |           |           |
|---|-----------|-----------|-----------|
| C | -4.587818 | -0.964108 | -0.536212 |
| C | -5.970669 | -1.122429 | -0.736555 |
| C | -3.732048 | -1.924157 | -1.108068 |
| C | -6.466943 | -2.196203 | -1.468645 |
| H | -6.671585 | -0.410560 | -0.324111 |
| C | -4.245013 | -2.995242 | -1.827562 |
| H | -2.658269 | -1.851054 | -1.006846 |
| C | -5.615474 | -3.146387 | -2.018120 |
| H | -7.539498 | -2.283673 | -1.602229 |
| H | -3.553365 | -3.716571 | -2.248939 |
| H | -6.007528 | -3.982201 | -2.584463 |
| N | -1.868625 | 1.116808  | -0.061567 |
| H | -0.914550 | 1.112435  | 0.429919  |
| C | -1.611639 | 0.650228  | -1.449579 |
| H | -1.003732 | 1.395647  | -1.958039 |
| H | -1.060813 | -0.286873 | -1.383184 |
| H | -2.554640 | 0.498707  | -1.971053 |
| C | -2.359442 | 2.494967  | 0.029504  |
| C | -3.203496 | 3.023048  | -0.937964 |
| C | -2.003419 | 3.224404  | 1.158123  |
| C | -3.698160 | 4.312061  | -0.764357 |
| H | -3.483845 | 2.447901  | -1.811218 |
| C | -2.503224 | 4.511682  | 1.319279  |
| H | -1.349951 | 2.783920  | 1.903476  |
| C | -3.352620 | 5.055113  | 0.360240  |
| H | -4.359166 | 4.732080  | -1.512903 |
| H | -2.228294 | 5.086256  | 2.195557  |
| H | -3.742374 | 6.058020  | 0.487708  |

### IM<sub>18</sub>

| Symbol | X         | Y         | Z         |
|--------|-----------|-----------|-----------|
| C      | 4.103387  | 0.245898  | 1.589036  |
| H      | 4.564692  | -0.359612 | 0.799882  |
| O      | 2.780040  | 0.422079  | 1.469098  |
| Si     | 1.651833  | -0.333152 | 0.448719  |
| H      | 3.718391  | -3.389808 | 0.049784  |
| C      | 0.338569  | -1.498209 | 1.103001  |
| C      | -0.117613 | -2.553082 | 0.301511  |
| C      | -0.214758 | -1.348789 | 2.380812  |
| C      | -1.115511 | -3.414701 | 0.750907  |
| H      | 0.304256  | -2.703290 | -0.688247 |
| C      | -1.189830 | -2.226765 | 2.845809  |
| H      | 0.115964  | -0.536391 | 3.019402  |
| C      | -1.651218 | -3.253682 | 2.026061  |



|    |           |           |           |
|----|-----------|-----------|-----------|
| H  | -1.471914 | -4.212471 | 0.108448  |
| H  | -1.597270 | -2.103726 | 3.843115  |
| H  | -2.422303 | -3.928445 | 2.380574  |
| O  | 1.559936  | 0.275702  | -1.089010 |
| C  | 3.269774  | -2.577251 | 0.640388  |
| O  | 3.296412  | -2.560344 | 1.847360  |
| O  | 2.734474  | -1.649865 | -0.121634 |
| O  | 0.512098  | 1.095615  | 1.025892  |
| H  | 0.908758  | 1.973261  | 0.935431  |
| Si | 2.558340  | 0.129327  | -2.407884 |
| H  | 2.430614  | -1.194392 | -3.052680 |
| H  | 2.136545  | 1.191798  | -3.345981 |
| C  | 4.327012  | 0.401633  | -1.863731 |
| C  | 5.252036  | -0.649349 | -1.834242 |
| C  | 4.716438  | 1.646271  | -1.350150 |
| C  | 6.526228  | -0.465589 | -1.304277 |
| H  | 4.969619  | -1.627846 | -2.210816 |
| C  | 5.987099  | 1.833019  | -0.812237 |
| H  | 4.019114  | 2.480043  | -1.355717 |
| C  | 6.891821  | 0.775287  | -0.787431 |
| H  | 7.230216  | -1.290057 | -1.285716 |
| H  | 6.268948  | 2.798863  | -0.408477 |
| H  | 7.880003  | 0.916867  | -0.364473 |
| O  | 4.725128  | 0.745017  | 2.480787  |
| H  | -2.304955 | -0.770484 | 0.620652  |
| H  | -2.743731 | 0.532379  | 1.726187  |
| C  | -2.747238 | 0.222232  | 0.680027  |
| N  | -4.102159 | 0.214160  | 0.183611  |
| C  | -5.041679 | 1.133702  | 0.815455  |
| H  | -5.704488 | 0.614212  | 1.517983  |
| H  | -4.486007 | 1.892265  | 1.362272  |
| H  | -5.655734 | 1.641509  | 0.067392  |
| C  | -4.617053 | -0.865245 | -0.529574 |
| C  | -6.008248 | -1.004198 | -0.706354 |
| C  | -3.790802 | -1.846548 | -1.115985 |
| C  | -6.535671 | -2.071805 | -1.425149 |
| H  | -6.690390 | -0.279420 | -0.284654 |
| C  | -4.335585 | -2.910525 | -1.821509 |
| H  | -2.714717 | -1.787584 | -1.036168 |
| C  | -5.712158 | -3.039849 | -1.987110 |
| H  | -7.612091 | -2.141113 | -1.538786 |
| H  | -3.664174 | -3.644657 | -2.254028 |
| H  | -6.129088 | -3.870410 | -2.543353 |
| N  | -1.832004 | 1.148167  | -0.050290 |

|   |           |           |           |
|---|-----------|-----------|-----------|
| H | -0.456328 | 1.097516  | 0.588789  |
| C | -1.630669 | 0.718834  | -1.442622 |
| H | -0.979802 | 1.432476  | -1.947411 |
| H | -1.132275 | -0.251408 | -1.428620 |
| H | -2.575376 | 0.633807  | -1.987315 |
| C | -2.235690 | 2.527203  | 0.099943  |
| C | -2.855890 | 3.243390  | -0.920714 |
| C | -2.007739 | 3.137786  | 1.336099  |
| C | -3.253043 | 4.560600  | -0.698114 |
| H | -3.037628 | 2.784949  | -1.884513 |
| C | -2.411566 | 4.448633  | 1.552152  |
| H | -1.527096 | 2.575915  | 2.130667  |
| C | -3.038487 | 5.165234  | 0.534738  |
| H | -3.737702 | 5.110820  | -1.496372 |
| H | -2.231837 | 4.912344  | 2.515133  |
| H | -3.351686 | 6.188920  | 0.702282  |

### TS<sub>1</sub>

| Symbol | X         | Y         | Z         |
|--------|-----------|-----------|-----------|
| C      | -2.277676 | -0.835949 | -0.343539 |
| H      | -1.971993 | -1.291633 | -1.288866 |
| O      | -1.428290 | -0.608332 | 0.554494  |
| N      | -3.551406 | -0.560446 | -0.218268 |
| C      | -4.091148 | 0.054244  | 0.990834  |
| H      | -4.534200 | 1.017319  | 0.734264  |
| H      | -4.860640 | -0.596475 | 1.407615  |
| H      | -3.291676 | 0.192110  | 1.712279  |
| C      | -4.502218 | -0.858705 | -1.284199 |
| H      | -3.980264 | -1.299665 | -2.130458 |
| H      | -5.251986 | -1.558780 | -0.914377 |
| H      | -4.992345 | 0.063110  | -1.598417 |
| Si     | 0.488134  | -0.933437 | 0.333968  |
| H      | 2.061854  | -1.292298 | 0.157827  |
| H      | 0.466982  | -1.559456 | 1.671464  |
| H      | 0.168954  | -1.764061 | -0.853649 |
| C      | 0.862233  | 0.911034  | 0.130327  |
| C      | 2.131739  | 1.295672  | -0.328034 |
| C      | -0.058398 | 1.927716  | 0.425046  |
| C      | 2.464314  | 2.636458  | -0.498871 |
| H      | 2.875250  | 0.537143  | -0.551340 |
| C      | 0.274526  | 3.269897  | 0.266654  |
| H      | -1.046626 | 1.673282  | 0.787607  |
| C      | 1.535633  | 3.627918  | -0.199781 |
| H      | 3.449938  | 2.905816  | -0.860397 |

|   |           |           |           |
|---|-----------|-----------|-----------|
| H | -0.452775 | 4.036721  | 0.507323  |
| H | 1.793292  | 4.672962  | -0.326717 |
| C | 3.076318  | -2.382159 | -0.024223 |
| O | 2.502680  | -3.406432 | 0.149090  |
| O | 4.073556  | -1.788306 | -0.274919 |

**TS<sub>2</sub>**

| Symbol | X         | Y         | Z         |
|--------|-----------|-----------|-----------|
| C      | 2.267881  | -0.689059 | 0.123585  |
| H      | 1.868757  | -0.833708 | 1.127933  |
| O      | 1.491137  | -0.669509 | -0.885325 |
| N      | 3.554570  | -0.544921 | 0.013472  |
| C      | 4.210517  | -0.333492 | -1.273771 |
| H      | 4.738133  | 0.620919  | -1.242659 |
| H      | 4.929337  | -1.137986 | -1.435379 |
| H      | 3.471511  | -0.327931 | -2.069193 |
| C      | 4.426543  | -0.588323 | 1.183390  |
| H      | 3.832297  | -0.730645 | 2.083166  |
| H      | 5.130400  | -1.413632 | 1.070022  |
| H      | 4.976588  | 0.351116  | 1.247937  |
| Si     | -0.357319 | -0.623715 | -0.786217 |
| H      | -2.004115 | -0.714828 | -0.727024 |
| H      | -0.407575 | -1.024597 | -2.200795 |
| C      | -0.449650 | 1.165758  | -0.208942 |
| C      | -1.617706 | 1.640005  | 0.406626  |
| C      | 0.603297  | 2.072294  | -0.410649 |
| C      | -1.724627 | 2.964000  | 0.819875  |
| H      | -2.447954 | 0.961975  | 0.569183  |
| C      | 0.493816  | 3.400424  | -0.007994 |
| H      | 1.518677  | 1.752422  | -0.896466 |
| C      | -0.668677 | 3.847080  | 0.612341  |
| H      | -2.633305 | 3.307347  | 1.301330  |
| H      | 1.316772  | 4.084998  | -0.179539 |
| H      | -0.752659 | 4.880284  | 0.930099  |
| C      | -3.212286 | -1.426296 | -0.819110 |
| O      | -2.956766 | -2.594028 | -0.860172 |
| O      | -4.071126 | -0.596685 | -0.831702 |
| O      | -0.282876 | -1.904781 | 0.351301  |
| C      | -1.130959 | -2.136204 | 1.352423  |
| H      | -1.057491 | -3.174505 | 1.698953  |
| O      | -1.857766 | -1.318886 | 1.843831  |

**TS<sub>3</sub>**

| Symbol | X | Y | Z |
|--------|---|---|---|
|--------|---|---|---|

|    |           |           |           |
|----|-----------|-----------|-----------|
| C  | 1.067515  | -1.798805 | -1.941346 |
| H  | 0.971678  | -2.149398 | -2.975635 |
| O  | 0.034439  | -1.034269 | -1.596180 |
| Si | -0.210707 | -0.302882 | -0.075699 |
| H  | -0.128589 | -2.588740 | 2.696949  |
| H  | -1.641878 | -1.186098 | -0.039698 |
| H  | 2.527479  | -0.754680 | 1.012988  |
| C  | -1.232606 | 1.255840  | -0.091542 |
| C  | -0.684169 | 2.507886  | 0.224304  |
| C  | -2.593381 | 1.188484  | -0.424411 |
| C  | -1.473521 | 3.653350  | 0.213292  |
| H  | 0.364597  | 2.594539  | 0.481849  |
| C  | -3.378451 | 2.336593  | -0.449644 |
| H  | -3.048358 | 0.232785  | -0.665121 |
| C  | -2.820266 | 3.569895  | -0.127545 |
| H  | -1.035188 | 4.611566  | 0.467821  |
| H  | -4.426870 | 2.266794  | -0.715860 |
| H  | -3.433506 | 4.463871  | -0.140205 |
| C  | -0.575538 | -1.708108 | 2.223537  |
| O  | 0.240426  | -1.194254 | 1.289333  |
| O  | -1.629340 | -1.234005 | 2.529626  |
| C  | 2.484595  | 0.135234  | 0.392518  |
| O  | 1.368236  | 0.529322  | -0.099269 |
| C  | -2.174463 | -2.377881 | -0.350913 |
| O  | -3.213066 | -2.163054 | -0.915386 |
| O  | -1.453657 | -3.256596 | 0.042893  |
| N  | 3.580100  | 0.793356  | 0.186029  |
| C  | 3.626399  | 2.008280  | -0.624652 |
| H  | 2.683188  | 2.143746  | -1.145551 |
| H  | 3.820683  | 2.860227  | 0.028799  |
| H  | 4.440622  | 1.909634  | -1.342497 |
| C  | 4.843188  | 0.358441  | 0.777887  |
| H  | 5.550664  | 0.142203  | -0.023009 |
| H  | 5.233277  | 1.163163  | 1.401859  |
| H  | 4.679837  | -0.532283 | 1.380578  |
| O  | 1.988743  | -2.076740 | -1.223043 |

**TS<sub>4a</sub>**

| Symbol | X         | Y         | Z         |
|--------|-----------|-----------|-----------|
| Si     | 1.449066  | 0.156012  | -0.331474 |
| H      | -0.442113 | 1.179761  | 2.586606  |
| H      | -0.007465 | -2.321474 | -2.100066 |
| C      | 3.194777  | -0.418112 | 0.015103  |
| C      | 3.684222  | -1.686342 | -0.325204 |

|   |           |           |           |
|---|-----------|-----------|-----------|
| C | 4.091664  | 0.505447  | 0.575733  |
| C | 5.020309  | -2.017890 | -0.118646 |
| H | 3.013007  | -2.423472 | -0.747003 |
| C | 5.422659  | 0.169959  | 0.801145  |
| H | 3.738347  | 1.489753  | 0.862332  |
| C | 5.891073  | -1.092411 | 0.448508  |
| H | 5.380077  | -3.002262 | -0.396373 |
| H | 6.093924  | 0.894615  | 1.248042  |
| H | 6.929755  | -1.354122 | 0.616848  |
| C | 0.491366  | 1.027677  | 2.029617  |
| O | 0.270897  | 0.375091  | 0.891706  |
| O | 1.566173  | 1.390968  | 2.417754  |
| C | 0.214233  | -1.598120 | -1.309011 |
| O | 0.796809  | -1.910634 | -0.233085 |
| O | 0.583587  | -0.358697 | -1.722666 |
| O | 1.659548  | 1.766319  | -0.710869 |
| N | -1.608780 | -1.301944 | -0.910056 |
| H | -1.533243 | -0.566111 | -0.206417 |
| C | -2.273840 | -0.799838 | -2.119690 |
| H | -1.892240 | 0.197797  | -2.323009 |
| H | -2.031112 | -1.447877 | -2.963377 |
| H | -3.356276 | -0.765737 | -1.985867 |
| C | -2.131513 | -2.488918 | -0.313604 |
| C | -2.783173 | -3.455743 | -1.075837 |
| C | -1.899481 | -2.701795 | 1.045937  |
| C | -3.212081 | -4.632286 | -0.465642 |
| H | -2.965549 | -3.298175 | -2.131427 |
| C | -2.334859 | -3.876447 | 1.643612  |
| H | -1.378409 | -1.943449 | 1.619562  |
| C | -2.992614 | -4.846955 | 0.890062  |
| H | -3.723618 | -5.380911 | -1.059296 |
| H | -2.159464 | -4.034295 | 2.701387  |
| H | -3.333122 | -5.762464 | 1.358955  |
| H | 2.493989  | 1.994290  | -1.129026 |

#### TS<sub>4b</sub>

| Symbol | X        | Y         | Z         |
|--------|----------|-----------|-----------|
| Si     | 1.396313 | 0.082351  | -0.236311 |
| H      | 0.018602 | -2.230113 | -2.237666 |
| C      | 3.185960 | -0.436808 | 0.035435  |
| C      | 3.638614 | -1.764924 | 0.007219  |
| C      | 4.135205 | 0.562164  | 0.309562  |
| C      | 4.976263 | -2.078906 | 0.230665  |
| H      | 2.934650 | -2.561976 | -0.192287 |

|   |           |           |           |
|---|-----------|-----------|-----------|
| C | 5.472030  | 0.252834  | 0.543162  |
| H | 3.824335  | 1.599906  | 0.345401  |
| C | 5.897151  | -1.071121 | 0.501203  |
| H | 5.299019  | -3.113626 | 0.196797  |
| H | 6.180272  | 1.045869  | 0.755957  |
| H | 6.938428  | -1.316198 | 0.678589  |
| O | 0.331909  | 0.189873  | 1.044921  |
| C | 0.249646  | -1.529439 | -1.431356 |
| O | 0.811746  | -1.881426 | -0.349797 |
| O | 0.607040  | -0.281997 | -1.761523 |
| O | 1.556011  | 1.743541  | -0.483296 |
| N | -1.615842 | -1.261393 | -0.996451 |
| H | -1.513658 | -0.522091 | -0.300557 |
| C | -2.296326 | -0.769893 | -2.197656 |
| H | -1.892878 | 0.212808  | -2.432327 |
| H | -2.091406 | -1.441305 | -3.033422 |
| H | -3.375108 | -0.701911 | -2.044092 |
| C | -2.115579 | -2.440163 | -0.375125 |
| C | -2.821975 | -3.403964 | -1.092012 |
| C | -1.806203 | -2.649358 | 0.971192  |
| C | -3.226511 | -4.572959 | -0.450518 |
| H | -3.064512 | -3.250665 | -2.136292 |
| C | -2.218629 | -3.815912 | 1.599221  |
| H | -1.237836 | -1.892710 | 1.501535  |
| C | -2.930402 | -4.783505 | 0.891138  |
| H | -3.779992 | -5.318991 | -1.008920 |
| H | -1.982327 | -3.971661 | 2.645504  |
| H | -3.252464 | -5.692885 | 1.384390  |
| H | 2.082837  | 2.015292  | -1.239362 |
| H | 0.227441  | 1.104296  | 1.329737  |

#### TS<sub>4</sub>

| Symbol | X         | Y         | Z         |
|--------|-----------|-----------|-----------|
| Si     | 1.153947  | -0.255392 | 0.366452  |
| H      | -0.216808 | -2.053928 | -2.460829 |
| H      | 3.147259  | -2.877327 | 1.899016  |
| H      | -1.179994 | 1.357760  | 2.162762  |
| C      | 2.596344  | 0.829264  | -0.087543 |
| C      | 2.546646  | 2.229168  | -0.070908 |
| C      | 3.799809  | 0.214092  | -0.468326 |
| C      | 3.662623  | 2.988054  | -0.414110 |
| H      | 1.632380  | 2.734948  | 0.210086  |
| C      | 4.910097  | 0.970422  | -0.822276 |
| H      | 3.867150  | -0.867151 | -0.507141 |

|                        |           |           |           |   |           |           |           |
|------------------------|-----------|-----------|-----------|---|-----------|-----------|-----------|
| C                      | 4.844532  | 2.361215  | -0.792022 | H | 4.567609  | 3.471547  | -1.303970 |
| H                      | 3.604355  | 4.070182  | -0.388729 | H | 6.589402  | -0.278951 | -1.792763 |
| H                      | 5.826914  | 0.474798  | -1.120301 | H | 6.588155  | 2.195972  | -1.968878 |
| H                      | 5.711770  | 2.952285  | -1.064052 | O | 1.121025  | -1.528253 | -1.203113 |
| C                      | 0.612648  | -1.594104 | -1.910373 | C | 0.433747  | 0.761491  | 1.081109  |
| O                      | 0.163495  | -0.924285 | -0.842559 | O | 0.729478  | 0.790351  | -0.251978 |
| O                      | 1.761535  | -1.668663 | -2.235047 | O | 1.167248  | -0.336881 | 1.521002  |
| C                      | -0.565282 | 0.838248  | 1.428116  | C | 3.604748  | -2.093674 | 1.546763  |
| O                      | -0.154261 | 1.339357  | 0.355497  | O | 2.727421  | -2.063655 | 0.571982  |
| O                      | 0.190192  | -0.181959 | 1.813723  | O | 4.035160  | -1.148307 | 2.159637  |
| C                      | 2.748102  | -1.858061 | 1.814990  | N | -1.034428 | 0.497423  | 1.323594  |
| O                      | 1.927083  | -1.742158 | 0.779821  | H | -1.276623 | -0.581331 | 0.613136  |
| O                      | 3.031032  | -0.971142 | 2.574750  | C | -1.259490 | 0.169797  | 2.744781  |
| N                      | -2.320355 | -0.241420 | 0.874168  | H | -0.733546 | -0.757038 | 2.962592  |
| H                      | -1.915418 | -0.877661 | 0.191648  | H | -0.875081 | 0.957608  | 3.397966  |
| C                      | -2.769410 | -0.932555 | 2.080260  | H | -2.327230 | 0.039453  | 2.918030  |
| H                      | -2.054951 | -1.722246 | 2.304866  | C | -1.865571 | 1.567498  | 0.805807  |
| H                      | -2.788683 | -0.234762 | 2.921131  | C | -2.492820 | 2.485684  | 1.644182  |
| H                      | -3.765519 | -1.366253 | 1.956249  | C | -2.048690 | 1.647285  | -0.577041 |
| C                      | -3.181620 | 0.689912  | 0.258567  | C | -3.310652 | 3.473094  | 1.098291  |
| C                      | -4.210102 | 1.315366  | 0.966081  | H | -2.359430 | 2.438736  | 2.717219  |
| C                      | -2.938535 | 1.048661  | -1.072737 | C | -2.868143 | 2.632814  | -1.110906 |
| C                      | -4.990462 | 2.283471  | 0.337692  | H | -1.542998 | 0.942770  | -1.224459 |
| H                      | -4.409895 | 1.048720  | 1.996359  | C | -3.504073 | 3.548640  | -0.275283 |
| C                      | -3.725881 | 2.010591  | -1.687967 | H | -3.797849 | 4.181925  | 1.757618  |
| H                      | -2.127881 | 0.566669  | -1.608970 | H | -3.012295 | 2.682343  | -2.183979 |
| C                      | -4.757269 | 2.634692  | -0.986506 | H | -4.146760 | 4.313966  | -0.694194 |
| H                      | -5.789889 | 2.760042  | 0.893572  | N | -1.491215 | -1.623050 | -0.086471 |
| H                      | -3.533307 | 2.275552  | -2.721337 | H | -0.813983 | -1.560762 | -0.856063 |
| H                      | -5.371396 | 3.384730  | -1.470327 | C | -1.150142 | -2.814058 | 0.726313  |
| <b>TS<sub>5a</sub></b> |           |           |           | H | -0.121839 | -2.705370 | 1.072278  |
| Symbol                 | X         | Y         | Z         | H | -1.815012 | -2.867732 | 1.587383  |
| Si                     | 1.891667  | -0.589065 | -0.033127 | H | -1.248550 | -3.720850 | 0.127638  |
| H                      | 3.936053  | -3.123712 | 1.758727  | C | -2.843209 | -1.580876 | -0.583358 |
| H                      | 0.684539  | 1.683893  | 1.625558  | C | -3.894016 | -1.457389 | 0.322133  |
| C                      | 3.429390  | 0.320004  | -0.640180 | C | -3.082022 | -1.586403 | -1.953079 |
| C                      | 3.448607  | 1.715614  | -0.764044 | C | -5.194685 | -1.339248 | -0.153789 |
| C                      | 4.587375  | -0.377073 | -1.018447 | H | -3.689033 | -1.438473 | 1.387765  |
| C                      | 4.577018  | 2.389637  | -1.228080 | C | -4.386782 | -1.461976 | -2.420818 |
| H                      | 2.562331  | 2.280733  | -0.499136 | H | -2.249079 | -1.675227 | -2.642833 |
| C                      | 5.710982  | 0.286139  | -1.500677 | C | -5.443799 | -1.338766 | -1.524288 |
| H                      | 4.615765  | -1.459018 | -0.936766 | H | -6.013893 | -1.237684 | 0.548253  |
| C                      | 5.710675  | 1.675617  | -1.601178 | H | -4.574663 | -1.461634 | -3.488073 |
|                        |           |           |           | H | -6.458535 | -1.240588 | -1.891205 |

H 1.515351 -2.403427 -1.277414

**TS<sub>5b</sub>**

| Symbol | X         | Y         | Z         |
|--------|-----------|-----------|-----------|
| Si     | 2.062274  | -0.897635 | 0.212643  |
| H      | 1.021088  | 1.777378  | 1.362800  |
| C      | 3.689169  | -0.086075 | -0.326590 |
| C      | 3.726423  | 1.174666  | -0.942506 |
| C      | 4.917262  | -0.733839 | -0.119911 |
| C      | 4.928326  | 1.761438  | -1.332215 |
| H      | 2.793566  | 1.699206  | -1.114400 |
| C      | 6.123745  | -0.155390 | -0.507140 |
| H      | 4.922596  | -1.708862 | 0.354545  |
| C      | 6.132145  | 1.096830  | -1.115324 |
| H      | 4.926185  | 2.737889  | -1.804825 |
| H      | 7.057142  | -0.680296 | -0.333864 |
| H      | 7.069366  | 1.551512  | -1.417121 |
| O      | 1.308604  | -1.868351 | -0.960990 |
| C      | 0.705880  | 0.778592  | 1.023041  |
| O      | 0.977931  | 0.504094  | -0.283440 |
| O      | 1.357276  | -0.249259 | 1.686790  |
| O      | 2.670161  | -2.280475 | 1.034527  |
| N      | -0.782929 | 0.671402  | 1.302462  |
| H      | -1.073127 | -0.503082 | 0.751654  |
| C      | -1.030151 | 0.593592  | 2.753279  |
| H      | -0.562346 | -0.315284 | 3.123908  |
| H      | -0.600593 | 1.452115  | 3.277308  |
| H      | -2.104146 | 0.556985  | 2.934231  |
| C      | -1.537757 | 1.694461  | 0.609170  |
| C      | -2.131015 | 2.758944  | 1.284556  |
| C      | -1.686151 | 1.583487  | -0.776753 |
| C      | -2.878507 | 3.698880  | 0.577676  |
| H      | -2.024783 | 2.863321  | 2.356306  |
| C      | -2.435098 | 2.523882  | -1.471545 |
| H      | -1.203952 | 0.768780  | -1.300526 |
| C      | -3.036747 | 3.584574  | -0.797575 |
| H      | -3.338944 | 4.521045  | 1.113082  |
| H      | -2.551467 | 2.423884  | -2.544580 |
| H      | -3.624422 | 4.314316  | -1.341997 |
| N      | -1.305352 | -1.613085 | 0.200283  |
| H      | -0.610078 | -1.683451 | -0.554904 |
| C      | -1.033083 | -2.694826 | 1.176584  |
| H      | 0.004318  | -2.608369 | 1.501698  |
| H      | -1.692002 | -2.579182 | 2.036196  |

|   |           |           |           |
|---|-----------|-----------|-----------|
| H | -1.197329 | -3.668851 | 0.713092  |
| C | -2.644442 | -1.591113 | -0.333268 |
| C | -3.710343 | -1.315675 | 0.519357  |
| C | -2.852531 | -1.774350 | -1.695666 |
| C | -4.995494 | -1.224978 | -0.002952 |
| H | -3.530140 | -1.160750 | 1.578190  |
| C | -4.141489 | -1.676408 | -2.210646 |
| H | -2.007227 | -1.980774 | -2.343863 |
| C | -5.213849 | -1.402594 | -1.367105 |
| H | -5.826755 | -1.006161 | 0.656886  |
| H | -4.305158 | -1.815195 | -3.272863 |
| H | -6.216551 | -1.325859 | -1.770411 |
| H | 1.620268  | -2.776395 | -0.886469 |
| H | 2.911100  | -2.107925 | 1.947817  |

**TS<sub>5</sub>**

| Symbol | X         | Y         | Z         |
|--------|-----------|-----------|-----------|
| Si     | 1.809468  | -0.331117 | 0.187437  |
| H      | 0.838992  | -3.200457 | -1.860565 |
| H      | 3.718901  | -2.592925 | 2.390868  |
| H      | 0.452248  | 2.102797  | 1.428027  |
| C      | 3.348846  | 0.520543  | -0.470551 |
| C      | 3.332832  | 1.884812  | -0.788687 |
| C      | 4.554880  | -0.175234 | -0.643682 |
| C      | 4.476481  | 2.534475  | -1.250863 |
| H      | 2.410646  | 2.443732  | -0.678851 |
| C      | 5.695009  | 0.463538  | -1.117376 |
| H      | 4.593791  | -1.235901 | -0.423160 |
| C      | 5.659793  | 1.824104  | -1.417866 |
| H      | 4.440064  | 3.593020  | -1.483726 |
| H      | 6.613814  | -0.097062 | -1.250447 |
| H      | 6.550236  | 2.324642  | -1.782026 |
| C      | 1.606730  | -2.485859 | -1.528140 |
| O      | 1.052427  | -1.454886 | -0.896044 |
| O      | 2.774237  | -2.627924 | -1.755591 |
| C      | 0.245993  | 1.104104  | 1.016794  |
| O      | 0.614584  | 0.943218  | -0.290123 |
| O      | 0.984037  | 0.102380  | 1.644345  |
| C      | 3.409837  | -1.600551 | 2.025425  |
| O      | 2.579200  | -1.703382 | 1.013720  |
| O      | 3.818560  | -0.580530 | 2.521428  |
| N      | -1.220118 | 0.832248  | 1.230107  |
| H      | -1.409484 | -0.376162 | 0.711290  |
| C      | -1.505974 | 0.748705  | 2.676054  |

|                        |           |           |           |   |           |           |           |
|------------------------|-----------|-----------|-----------|---|-----------|-----------|-----------|
| H                      | -0.981516 | -0.118090 | 3.072486  | C | 6.081934  | -0.036139 | 0.347412  |
| H                      | -1.160061 | 1.643389  | 3.200724  | H | 5.625885  | 0.783239  | 2.281962  |
| H                      | -2.578657 | 0.630392  | 2.823097  | H | 6.219693  | -0.816452 | -1.652673 |
| C                      | -2.052562 | 1.766435  | 0.496331  | H | 7.142034  | -0.140943 | 0.549813  |
| C                      | -2.735163 | 2.801194  | 1.130497  | O | 1.052435  | 1.508144  | -1.729251 |
| C                      | -2.177726 | 1.590580  | -0.883834 | C | 0.356188  | 0.974266  | 1.565600  |
| C                      | -3.550541 | 3.649813  | 0.384494  | O | 1.161803  | 1.658881  | 0.769750  |
| H                      | -2.646219 | 2.951021  | 2.198660  | O | 0.322722  | -0.337483 | 0.486349  |
| C                      | -2.995460 | 2.439312  | -1.617989 | C | 1.641361  | -2.186530 | -1.522027 |
| H                      | -1.626938 | 0.798349  | -1.374717 | O | 1.378277  | -0.925345 | -1.746643 |
| C                      | -3.686817 | 3.470937  | -0.986479 | O | 1.866301  | -2.690075 | -0.444201 |
| H                      | -4.081008 | 4.451107  | 0.885441  | N | -0.909458 | 1.436104  | 1.809395  |
| H                      | -3.094321 | 2.290998  | -2.687054 | H | -0.143764 | -1.268008 | 0.497925  |
| H                      | -4.327591 | 4.129102  | -1.561347 | C | -1.696540 | 0.607096  | 2.719645  |
| N                      | -1.600070 | -1.513955 | 0.204308  | H | -1.091771 | 0.375555  | 3.597124  |
| H                      | -0.974905 | -1.549445 | -0.605067 | H | -2.579789 | 1.161193  | 3.035477  |
| C                      | -1.171628 | -2.556758 | 1.167622  | H | -2.012183 | -0.330503 | 2.249285  |
| H                      | -0.122728 | -2.386641 | 1.410496  | C | -1.607562 | 2.108004  | 0.756980  |
| H                      | -1.769039 | -2.475617 | 2.074570  | C | -2.728381 | 1.527298  | 0.164198  |
| H                      | -1.297567 | -3.547306 | 0.728353  | C | -1.172696 | 3.366034  | 0.340019  |
| C                      | -2.976173 | -1.596486 | -0.223970 | C | -3.408550 | 2.205791  | -0.844321 |
| C                      | -3.988352 | -1.367029 | 0.703383  | H | -3.071973 | 0.548411  | 0.481681  |
| C                      | -3.273583 | -1.832803 | -1.561223 | C | -1.852252 | 4.033125  | -0.671176 |
| C                      | -5.312885 | -1.376158 | 0.280773  | H | -0.303185 | 3.805230  | 0.810926  |
| H                      | -3.739265 | -1.174125 | 1.741618  | C | -2.972533 | 3.456899  | -1.266860 |
| C                      | -4.601667 | -1.834842 | -1.975817 | H | -4.279431 | 1.747178  | -1.299731 |
| H                      | -2.467844 | -2.003262 | -2.268239 | H | -1.509217 | 5.010415  | -0.990983 |
| C                      | -5.622060 | -1.607268 | -1.057346 | H | -3.503547 | 3.982990  | -2.051614 |
| H                      | -6.104204 | -1.194654 | 0.998382  | N | -0.972378 | -2.585298 | 0.507094  |
| H                      | -4.836351 | -2.015393 | -3.018174 | H | -0.480428 | -3.141605 | -0.188137 |
| H                      | -6.655437 | -1.608306 | -1.382856 | C | -0.846964 | -3.205714 | 1.827360  |
|                        |           |           |           | H | 0.201428  | -3.463650 | 1.972489  |
| <b>TS<sub>6a</sub></b> |           |           |           | H | -1.138825 | -2.493739 | 2.601178  |
| Symbol                 | X         | Y         | Z         | H | -1.458052 | -4.108074 | 1.921829  |
| Si                     | 1.482831  | 0.427169  | -0.543108 | C | -2.269590 | -2.239247 | 0.037559  |
| H                      | 1.630174  | -2.780848 | -2.449411 | C | -3.392493 | -2.240655 | 0.864340  |
| H                      | 0.789449  | 0.488955  | 2.442306  | C | -2.388261 | -1.808710 | -1.288954 |
| C                      | 3.322199  | 0.232799  | -0.178294 | C | -4.619840 | -1.805767 | 0.363820  |
| C                      | 3.871023  | 0.623983  | 1.050377  | H | -3.319856 | -2.573225 | 1.892462  |
| C                      | 4.200801  | -0.291011 | -1.139229 | C | -3.615110 | -1.387565 | -1.779413 |
| C                      | 5.231014  | 0.482023  | 1.317889  | H | -1.506587 | -1.802988 | -1.922925 |
| H                      | 3.228185  | 1.055409  | 1.808964  | C | -4.739478 | -1.378530 | -0.952986 |
| C                      | 5.563304  | -0.416704 | -0.887612 | H | -5.486396 | -1.807742 | 1.015288  |
| H                      | 3.819736  | -0.605521 | -2.105694 | H | -3.693133 | -1.055837 | -2.808560 |

|   |           |           |           |
|---|-----------|-----------|-----------|
| H | -5.696277 | -1.043229 | -1.335339 |
| H | 1.033295  | 1.100327  | -2.599572 |

**TS<sub>6b</sub>**

| Symbol | X         | Y         | Z         |
|--------|-----------|-----------|-----------|
| Si     | 1.549939  | 0.063404  | -0.595723 |
| H      | 1.083033  | 0.397767  | 2.495075  |
| C      | 3.420257  | -0.084015 | -0.330468 |
| C      | 4.084854  | 0.482118  | 0.767610  |
| C      | 4.203407  | -0.791252 | -1.257063 |
| C      | 5.459632  | 0.339894  | 0.940741  |
| H      | 3.516156  | 1.051095  | 1.493646  |
| C      | 5.580434  | -0.925650 | -1.100074 |
| H      | 3.727005  | -1.242791 | -2.120683 |
| C      | 6.212737  | -0.363162 | 0.004890  |
| H      | 5.944304  | 0.783006  | 1.803986  |
| H      | 6.158440  | -1.471893 | -1.837569 |
| H      | 7.283979  | -0.470538 | 0.134847  |
| O      | 0.998322  | 1.138485  | -1.747953 |
| C      | 0.604944  | 0.789257  | 1.594560  |
| O      | 1.346409  | 1.405317  | 0.702807  |
| O      | 0.576835  | -0.644639 | 0.677334  |
| O      | 1.310826  | -1.293977 | -1.635631 |
| N      | -0.672346 | 1.233812  | 1.848708  |
| H      | -0.058967 | -1.445967 | 0.615754  |
| C      | -1.435719 | 0.395232  | 2.765893  |
| H      | -0.793068 | 0.112656  | 3.600618  |
| H      | -2.287508 | 0.956104  | 3.149629  |
| H      | -1.800412 | -0.517571 | 2.278675  |
| C      | -1.390062 | 1.955782  | 0.849151  |
| C      | -2.605715 | 1.482105  | 0.357500  |
| C      | -0.895689 | 3.184201  | 0.401093  |
| C      | -3.318218 | 2.231802  | -0.577387 |
| H      | -3.001816 | 0.530811  | 0.695391  |
| C      | -1.605683 | 3.918114  | -0.538133 |
| H      | 0.044517  | 3.547423  | 0.793119  |
| C      | -2.821742 | 3.446926  | -1.031829 |
| H      | -4.263606 | 1.853602  | -0.950037 |
| H      | -1.212768 | 4.869034  | -0.879668 |
| H      | -3.377704 | 4.027221  | -1.758976 |
| N      | -1.009517 | -2.725218 | 0.429817  |
| H      | -0.490244 | -3.237415 | -0.279363 |
| C      | -1.081631 | -3.497734 | 1.670798  |
| H      | -0.080161 | -3.858823 | 1.901424  |

|   |           |           |           |
|---|-----------|-----------|-----------|
| H | -1.412305 | -2.854653 | 2.487782  |
| H | -1.762617 | -4.350645 | 1.590858  |
| C | -2.219621 | -2.230570 | -0.127635 |
| C | -3.426931 | -2.241645 | 0.570478  |
| C | -2.161038 | -1.658643 | -1.404976 |
| C | -4.567627 | -1.691029 | -0.014971 |
| H | -3.489680 | -2.676361 | 1.560282  |
| C | -3.304293 | -1.124310 | -1.979661 |
| H | -1.206153 | -1.634733 | -1.922993 |
| C | -4.516203 | -1.136263 | -1.287591 |
| H | -5.502132 | -1.705580 | 0.534553  |
| H | -3.248542 | -0.685639 | -2.969635 |
| H | -5.407118 | -0.714577 | -1.737782 |
| H | 0.885193  | 0.685701  | -2.589206 |
| H | 1.670400  | -2.123484 | -1.309297 |

**TS<sub>6</sub>**

| Symbol | X         | Y         | Z         |
|--------|-----------|-----------|-----------|
| Si     | 1.369976  | 0.248631  | -0.140357 |
| H      | 0.581652  | 2.551968  | -2.833561 |
| H      | 1.465351  | -2.566755 | -2.545908 |
| H      | 0.508384  | -0.074352 | 2.810378  |
| C      | 3.209168  | 0.011035  | 0.154505  |
| C      | 3.763847  | 0.181404  | 1.429795  |
| C      | 4.069864  | -0.371852 | -0.885415 |
| C      | 5.120352  | -0.035533 | 1.663774  |
| H      | 3.129937  | 0.494237  | 2.251340  |
| C      | 5.427083  | -0.573359 | -0.661278 |
| H      | 3.675077  | -0.490896 | -1.888080 |
| C      | 5.955450  | -0.411534 | 0.617653  |
| H      | 5.523489  | 0.094517  | 2.661963  |
| H      | 6.073891  | -0.859036 | -1.483444 |
| H      | 7.012629  | -0.575096 | 0.795102  |
| C      | 1.295063  | 1.883751  | -2.330966 |
| O      | 0.849956  | 1.539669  | -1.131010 |
| O      | 2.343392  | 1.559001  | -2.816367 |
| C      | 0.171071  | 0.545771  | 1.978652  |
| O      | 1.073922  | 1.275938  | 1.338312  |
| O      | 0.162376  | -0.610698 | 0.730937  |
| C      | 1.483134  | -2.139277 | -1.531448 |
| O      | 1.221204  | -0.856365 | -1.540651 |
| O      | 1.708267  | -2.815487 | -0.553655 |
| N      | -1.083019 | 1.051776  | 2.182360  |
| H      | -0.386303 | -1.493525 | 0.531071  |

|   |           |           |           |
|---|-----------|-----------|-----------|
| C | -1.995484 | 0.160808  | 2.895895  |
| H | -1.482470 | -0.244927 | 3.768392  |
| H | -2.863301 | 0.729176  | 3.228590  |
| H | -2.332312 | -0.668974 | 2.264527  |
| C | -1.644941 | 1.915904  | 1.189043  |
| C | -2.743928 | 1.508764  | 0.433759  |
| C | -1.096441 | 3.183272  | 0.993871  |
| C | -3.284949 | 2.368114  | -0.519625 |
| H | -3.177634 | 0.525300  | 0.580474  |
| C | -1.637039 | 4.031279  | 0.036300  |
| H | -0.247525 | 3.487754  | 1.591719  |
| C | -2.732209 | 3.627554  | -0.725009 |
| H | -4.139844 | 2.044278  | -1.102970 |
| H | -1.205681 | 5.014800  | -0.111241 |
| H | -3.155649 | 4.294339  | -1.467140 |
| N | -1.243787 | -2.694368 | 0.241826  |
| H | -0.727659 | -3.177704 | -0.490470 |
| C | -1.290096 | -3.526519 | 1.447794  |
| H | -0.278395 | -3.878155 | 1.646337  |
| H | -1.622631 | -2.927295 | 2.296689  |
| H | -1.956236 | -4.385538 | 1.330471  |
| C | -2.470916 | -2.188253 | -0.280363 |
| C | -3.669508 | -2.249051 | 0.427649  |
| C | -2.428136 | -1.542748 | -1.520723 |
| C | -4.815940 | -1.660629 | -0.106940 |
| H | -3.719992 | -2.746839 | 1.388042  |
| C | -3.575870 | -0.969203 | -2.047213 |
| H | -1.486002 | -1.489810 | -2.058235 |
| C | -4.777303 | -1.020905 | -1.339866 |
| H | -5.744187 | -1.710570 | 0.450731  |
| H | -3.531046 | -0.471166 | -3.009003 |
| H | -5.672144 | -0.567656 | -1.749683 |

#### TS<sub>7</sub>

| Symbol | X         | Y         | Z         |
|--------|-----------|-----------|-----------|
| Si     | -2.390107 | -0.392454 | -0.276371 |
| H      | -1.189855 | -0.923911 | -3.565396 |
| C      | -4.532604 | 1.247092  | -0.164554 |
| H      | -4.863777 | 2.182553  | 0.301658  |
| C      | -1.045465 | -0.502526 | 0.989815  |
| C      | -0.118682 | -1.554917 | 0.993728  |
| C      | -0.958380 | 0.473974  | 1.992610  |
| C      | 0.877983  | -1.616257 | 1.963249  |
| H      | -0.171566 | -2.311271 | 0.219619  |

|    |           |           |           |
|----|-----------|-----------|-----------|
| C  | 0.036152  | 0.408211  | 2.963998  |
| H  | -1.668678 | 1.293155  | 2.013358  |
| C  | 0.958432  | -0.633989 | 2.947416  |
| H  | 1.589024  | -2.435306 | 1.954804  |
| H  | 0.094232  | 1.174589  | 3.728801  |
| H  | 1.735313  | -0.683540 | 3.702383  |
| C  | -1.072706 | -1.058901 | -2.480466 |
| O  | -0.895591 | -2.170295 | -1.963511 |
| O  | -1.982898 | -0.163671 | -1.845989 |
| Si | 1.668591  | -0.114969 | -1.897264 |
| H  | 1.468592  | -1.505964 | -1.425427 |
| H  | 0.062854  | -0.251590 | -2.395376 |
| C  | 1.234959  | 1.396055  | -0.845427 |
| C  | 1.988430  | 1.790438  | 0.269192  |
| C  | 0.102724  | 2.159254  | -1.170153 |
| C  | 1.620358  | 2.896070  | 1.033562  |
| H  | 2.875508  | 1.238605  | 0.560465  |
| C  | -0.263503 | 3.268558  | -0.414660 |
| H  | -0.511593 | 1.876326  | -2.018004 |
| C  | 0.493967  | 3.637828  | 0.693965  |
| H  | 2.215114  | 3.175114  | 1.896468  |
| H  | -1.142675 | 3.841228  | -0.688535 |
| H  | 0.207963  | 4.498257  | 1.288574  |
| O  | -3.254897 | 0.991948  | 0.135124  |
| O  | -5.225802 | 0.554397  | -0.851590 |
| H  | 2.076300  | 0.142164  | -3.296059 |
| C  | 3.907218  | -1.001918 | -0.500401 |
| H  | 3.295520  | -1.860302 | -0.213449 |
| O  | 3.469760  | -0.154327 | -1.335139 |
| N  | 5.082203  | -0.907391 | 0.054205  |
| C  | 5.992621  | 0.197186  | -0.229133 |
| H  | 6.285578  | 0.656737  | 0.715766  |
| H  | 6.879952  | -0.192581 | -0.730882 |
| H  | 5.498086  | 0.928201  | -0.862149 |
| C  | 5.558961  | -1.922491 | 0.987497  |
| H  | 4.800025  | -2.692496 | 1.110878  |
| H  | 6.473947  | -2.367253 | 0.593960  |
| H  | 5.769112  | -1.451796 | 1.948738  |
| H  | -4.878019 | -2.843719 | 0.609030  |
| C  | -4.273446 | -1.948053 | 0.794747  |
| O  | -4.368861 | -1.261768 | 1.773323  |
| O  | -3.418868 | -1.726933 | -0.205681 |

#### TS<sub>8</sub>



| Symbol | X         | Y         | Z         |
|--------|-----------|-----------|-----------|
| Si     | -1.302210 | 0.747772  | -2.060655 |
| H      | 1.307317  | 3.038241  | -1.608462 |
| H      | -0.800553 | -0.230416 | -3.043662 |
| H      | -1.653734 | 2.018099  | -2.725826 |
| C      | -2.707115 | 0.013836  | -1.080112 |
| C      | -2.992966 | 0.478833  | 0.210114  |
| C      | -3.431935 | -1.073548 | -1.578971 |
| C      | -3.970853 | -0.135405 | 0.985385  |
| H      | -2.441464 | 1.319976  | 0.620086  |
| C      | -4.420860 | -1.682068 | -0.808887 |
| H      | -3.218826 | -1.463484 | -2.569949 |
| C      | -4.685655 | -1.217589 | 0.475724  |
| H      | -4.175171 | 0.228114  | 1.986240  |
| H      | -4.974683 | -2.524552 | -1.207333 |
| H      | -5.446461 | -1.698244 | 1.080235  |
| Si     | 0.823420  | 0.392496  | 0.209056  |
| H      | 0.025763  | 3.406321  | -0.301811 |
| H      | -1.512124 | -2.452210 | 0.195146  |
| H      | -0.156003 | 1.576895  | 3.494811  |
| C      | 2.519507  | -0.323311 | -0.062076 |
| C      | 3.526144  | 0.334768  | -0.778895 |
| C      | 2.790896  | -1.600340 | 0.449713  |
| C      | 4.762627  | -0.268390 | -0.987342 |
| H      | 3.348738  | 1.328181  | -1.173642 |
| C      | 4.036276  | -2.192582 | 0.266813  |
| H      | 2.028081  | -2.133697 | 1.008241  |
| C      | 5.021739  | -1.529657 | -0.458952 |
| H      | 5.526737  | 0.250274  | -1.555057 |
| H      | 4.234221  | -3.173258 | 0.684241  |
| H      | 5.989273  | -1.994512 | -0.611662 |
| C      | 0.906204  | 2.836707  | -0.609428 |
| O      | -0.047366 | 1.209257  | -1.015185 |
| O      | 1.613826  | 2.244793  | 0.249529  |
| C      | -0.225137 | 1.643992  | 2.402636  |
| O      | -0.791832 | 2.530445  | 1.825103  |
| O      | 0.370363  | 0.606746  | 1.822202  |
| C      | -0.665646 | -1.961300 | 0.698010  |
| O      | -0.116729 | -1.042674 | -0.083962 |
| O      | -0.295018 | -2.261668 | 1.799677  |

**TS<sub>9a</sub>**

| Symbol | X         | Y         | Z        |
|--------|-----------|-----------|----------|
| N      | -0.879048 | -0.295972 | 0.291874 |

|   |           |           |           |
|---|-----------|-----------|-----------|
| H | -1.370104 | 0.645912  | 0.543633  |
| C | 0.551160  | -0.106328 | 0.155468  |
| C | 1.397859  | -1.191721 | -0.038707 |
| C | 1.040607  | 1.195427  | 0.164250  |
| C | 2.760010  | -0.963724 | -0.207935 |
| H | 1.005943  | -2.201611 | -0.058895 |
| C | 2.403603  | 1.412078  | -0.005555 |
| H | 0.351897  | 2.022508  | 0.301590  |
| C | 3.264204  | 0.333579  | -0.189108 |
| H | 3.427313  | -1.804292 | -0.356807 |
| H | 2.790801  | 2.423920  | 0.006302  |
| H | 4.326378  | 0.503733  | -0.319436 |
| C | -1.294752 | -1.293342 | 1.301626  |
| H | -0.893260 | -1.009133 | 2.273164  |
| H | -2.382879 | -1.286346 | 1.324024  |
| H | -0.941124 | -2.284339 | 1.019722  |
| C | -1.587354 | -0.559769 | -1.074530 |
| H | -1.351613 | -1.601550 | -1.330003 |
| O | -2.899152 | -0.311960 | -0.933476 |
| H | -1.051363 | 0.118136  | -1.757875 |
| O | -2.483856 | 1.682634  | 0.305763  |
| H | -3.062675 | 1.821877  | 1.059543  |
| H | -2.883984 | 0.742470  | -0.368250 |

**TS<sub>9</sub>**

| Symbol | X         | Y         | Z         |
|--------|-----------|-----------|-----------|
| N      | -1.312686 | 1.155079  | -0.040262 |
| H      | -0.352743 | 1.006665  | -0.429629 |
| C      | -1.896558 | 2.330758  | -0.734763 |
| H      | -2.879525 | 2.542974  | -0.317604 |
| H      | -1.230271 | 3.172370  | -0.558515 |
| H      | -1.969534 | 2.111895  | -1.798481 |
| C      | -2.072796 | -0.079467 | -0.175001 |
| C      | -1.417384 | -1.207610 | -0.651101 |
| C      | -3.403357 | -0.124571 | 0.222243  |
| C      | -2.116615 | -2.406305 | -0.745971 |
| H      | -0.373454 | -1.144222 | -0.943492 |
| C      | -4.091362 | -1.329391 | 0.124119  |
| H      | -3.898013 | 0.760662  | 0.604081  |
| C      | -3.452130 | -2.467203 | -0.360297 |
| H      | -1.614798 | -3.290198 | -1.120685 |
| H      | -5.129704 | -1.376603 | 0.429408  |
| H      | -3.995111 | -3.401794 | -0.435259 |
| H      | -0.711515 | 0.503036  | 1.856946  |

|   |           |           |           |
|---|-----------|-----------|-----------|
| H | -1.920079 | 1.830052  | 1.886561  |
| C | -0.977691 | 1.487078  | 1.445171  |
| O | -0.002145 | 2.413251  | 1.477416  |
| N | 1.511773  | 1.436649  | -0.234106 |
| H | 0.809532  | 2.012764  | 0.776853  |
| C | 1.768583  | 2.209648  | -1.431186 |
| H | 2.818161  | 2.529695  | -1.517045 |
| H | 1.524769  | 1.666532  | -2.356856 |
| H | 1.150834  | 3.111388  | -1.407363 |
| C | 2.240268  | 0.304193  | -0.040310 |
| C | 3.139433  | -0.245753 | -0.989133 |
| C | 2.098354  | -0.407688 | 1.183983  |
| C | 3.821853  | -1.432197 | -0.728969 |
| H | 3.299282  | 0.256934  | -1.935334 |
| C | 2.784366  | -1.583993 | 1.423683  |
| H | 1.447434  | 0.008727  | 1.946845  |
| C | 3.655831  | -2.120174 | 0.468342  |
| H | 4.498301  | -1.822080 | -1.483595 |
| H | 2.645874  | -2.091463 | 2.373266  |
| H | 4.191789  | -3.041671 | 0.660748  |

#### TS<sub>10</sub>

| Symbol | X         | Y         | Z         |
|--------|-----------|-----------|-----------|
| C      | -2.764981 | 1.669863  | 0.781831  |
| H      | -3.170628 | 1.166307  | -0.105656 |
| O      | -1.466790 | 1.418010  | 1.028637  |
| Si     | -0.339529 | 0.655797  | 0.051377  |
| H      | -1.859385 | 1.494159  | -3.174852 |
| C      | 1.152064  | 1.691214  | -0.300763 |
| C      | 2.025883  | 1.311332  | -1.323841 |
| C      | 1.409385  | 2.875635  | 0.401153  |
| C      | 3.147370  | 2.083003  | -1.622174 |
| H      | 1.842557  | 0.403369  | -1.891341 |
| C      | 2.520400  | 3.653698  | 0.096021  |
| H      | 0.731345  | 3.204358  | 1.183835  |
| C      | 3.394971  | 3.253573  | -0.912938 |
| H      | 3.823932  | 1.769133  | -2.409338 |
| H      | 2.704840  | 4.571483  | 0.642685  |
| H      | 4.264266  | 3.857209  | -1.148069 |
| O      | -0.244422 | -0.966517 | 0.175586  |
| C      | -1.554487 | 1.729709  | -2.146894 |
| O      | -1.615768 | 2.833850  | -1.673129 |
| O      | -1.130692 | 0.651864  | -1.501995 |
| N      | 2.718157  | -0.750445 | 1.785429  |

|    |           |           |           |
|----|-----------|-----------|-----------|
| C  | 2.912694  | -1.565483 | 0.668821  |
| C  | 2.182197  | -2.754530 | 0.481928  |
| C  | 3.895568  | -1.249501 | -0.283908 |
| C  | 2.396779  | -3.555309 | -0.629275 |
| H  | 1.446227  | -3.066798 | 1.210128  |
| C  | 4.110005  | -2.069930 | -1.389096 |
| H  | 4.484699  | -0.347773 | -0.183648 |
| C  | 3.359484  | -3.222175 | -1.582664 |
| H  | 1.809977  | -4.460946 | -0.742355 |
| H  | 4.872040  | -1.788995 | -2.108064 |
| H  | 3.524682  | -3.854224 | -2.446695 |
| C  | 3.614644  | 0.373081  | 2.004284  |
| H  | 3.499173  | 1.160267  | 1.248872  |
| H  | 3.402456  | 0.801386  | 2.985865  |
| H  | 4.654089  | 0.037701  | 2.002433  |
| C  | 1.480713  | -0.694012 | 2.496144  |
| H  | 1.678944  | -0.596150 | 3.565359  |
| O  | 0.640185  | 0.415958  | 2.122454  |
| H  | 0.882065  | -1.577805 | 2.314180  |
| H  | 0.986314  | 1.228396  | 2.515077  |
| Si | -1.186163 | -2.208649 | -0.413445 |
| H  | -0.860110 | -2.492994 | -1.825793 |
| H  | -0.910632 | -3.380176 | 0.441788  |
| C  | -2.970513 | -1.674357 | -0.247348 |
| C  | -3.731544 | -1.286997 | -1.357550 |
| C  | -3.531812 | -1.529055 | 1.029712  |
| C  | -5.013938 | -0.768231 | -1.197957 |
| H  | -3.316390 | -1.377330 | -2.356738 |
| C  | -4.811327 | -1.005913 | 1.193772  |
| H  | -2.963257 | -1.816122 | 1.910477  |
| C  | -5.552194 | -0.623864 | 0.078568  |
| H  | -5.590603 | -0.471635 | -2.066846 |
| H  | -5.227109 | -0.891617 | 2.188369  |
| H  | -6.547511 | -0.212769 | 0.203995  |
| O  | -3.414705 | 2.369847  | 1.497238  |

#### TS<sub>11</sub>

| Symbol | X         | Y         | Z         |
|--------|-----------|-----------|-----------|
| C      | 2.759844  | -1.808938 | 0.764904  |
| H      | 3.052238  | -1.183065 | -0.086907 |
| O      | 1.512031  | -1.632220 | 1.191553  |
| Si     | 0.186412  | -0.769560 | 0.527555  |
| H      | 1.553598  | -1.280155 | -2.954445 |
| C      | -1.239674 | -1.783754 | -0.197104 |

|    |           |           |           |
|----|-----------|-----------|-----------|
| C  | -1.826117 | -1.444593 | -1.422525 |
| C  | -1.784590 | -2.873121 | 0.497941  |
| C  | -2.927805 | -2.138690 | -1.919543 |
| H  | -1.423038 | -0.617132 | -1.998618 |
| C  | -2.862493 | -3.594823 | -0.006485 |
| H  | -1.358717 | -3.190509 | 1.445627  |
| C  | -3.448088 | -3.218863 | -1.212828 |
| H  | -3.374979 | -1.839655 | -2.861596 |
| H  | -3.250060 | -4.444750 | 0.544435  |
| H  | -4.297812 | -3.768500 | -1.602128 |
| O  | 0.188321  | 0.901281  | 0.536250  |
| C  | 1.342727  | -1.622618 | -1.927186 |
| O  | 1.464271  | -2.784808 | -1.610034 |
| O  | 0.980082  | -0.641732 | -1.146272 |
| N  | -2.882298 | 0.779796  | 1.571107  |
| C  | -2.763856 | 1.758749  | 0.522721  |
| C  | -2.185559 | 2.998852  | 0.788219  |
| C  | -3.265940 | 1.475938  | -0.744218 |
| C  | -2.069714 | 3.934355  | -0.231132 |
| H  | -1.837354 | 3.245787  | 1.783584  |
| C  | -3.146561 | 2.422794  | -1.757857 |
| H  | -3.737450 | 0.525597  | -0.954781 |
| C  | -2.542139 | 3.649029  | -1.509913 |
| H  | -1.614693 | 4.894670  | -0.018757 |
| H  | -3.530929 | 2.192108  | -2.744409 |
| H  | -2.450568 | 4.383441  | -2.301193 |
| C  | -3.984215 | -0.187636 | 1.484687  |
| H  | -3.788525 | -0.901738 | 0.682858  |
| H  | -4.052377 | -0.719757 | 2.430658  |
| H  | -4.913358 | 0.346053  | 1.287786  |
| C  | -2.004698 | 0.682691  | 2.527638  |
| H  | -2.265623 | 0.096427  | 3.396701  |
| O  | -0.536477 | -0.700321 | 2.145528  |
| H  | -1.213327 | 1.412366  | 2.590158  |
| H  | -0.680871 | -1.544337 | 2.585008  |
| Si | 1.068492  | 2.034286  | -0.281755 |
| H  | 0.607307  | 2.228445  | -1.674608 |
| H  | 0.909586  | 3.300355  | 0.470399  |
| C  | 2.881540  | 1.558015  | -0.259034 |
| C  | 3.566303  | 1.175766  | -1.418913 |
| C  | 3.552161  | 1.464996  | 0.967766  |
| C  | 4.876693  | 0.710025  | -1.356838 |
| H  | 3.064819  | 1.223324  | -2.381006 |
| C  | 4.859897  | 0.990633  | 1.037796  |

|   |          |           |           |
|---|----------|-----------|-----------|
| H | 3.046905 | 1.751757  | 1.886546  |
| C | 5.522422 | 0.611114  | -0.125975 |
| H | 5.392015 | 0.415686  | -2.264454 |
| H | 5.359026 | 0.913091  | 1.997194  |
| H | 6.539072 | 0.237797  | -0.074905 |
| O | 3.518237 | -2.567396 | 1.303627  |

### TS<sub>12</sub>

| Symbol | X         | Y         | Z         |
|--------|-----------|-----------|-----------|
| C      | -1.927152 | 2.823084  | 1.259934  |
| H      | -1.469715 | 3.275608  | 0.370150  |
| O      | -1.282894 | 1.755576  | 1.735283  |
| Si     | -0.080549 | 0.827808  | 0.953717  |
| H      | -1.977430 | 1.223056  | -2.622638 |
| C      | 1.251356  | 1.763863  | 0.021947  |
| C      | 1.575566  | 1.486465  | -1.311760 |
| C      | 2.030133  | 2.709428  | 0.701090  |
| C      | 2.637671  | 2.124320  | -1.943679 |
| H      | 0.997058  | 0.755345  | -1.868626 |
| C      | 3.076722  | 3.375284  | 0.066166  |
| H      | 1.821106  | 2.942484  | 1.741524  |
| C      | 3.387310  | 3.077094  | -1.257114 |
| H      | 2.879021  | 1.882849  | -2.973016 |
| H      | 3.653760  | 4.117259  | 0.606904  |
| H      | 4.208447  | 3.584054  | -1.751509 |
| O      | -0.393580 | -0.749625 | 0.544710  |
| C      | -1.531841 | 1.770347  | -1.769855 |
| O      | -1.309208 | 2.960361  | -1.848450 |
| O      | -1.308191 | 1.005784  | -0.744548 |
| N      | 1.680047  | -2.986529 | 0.914943  |
| C      | 2.797708  | -2.294237 | 0.313121  |
| C      | 3.546400  | -2.934937 | -0.670787 |
| C      | 3.110793  | -1.011139 | 0.746564  |
| C      | 4.607934  | -2.256960 | -1.255014 |
| H      | 3.322295  | -3.955335 | -0.958044 |
| C      | 4.178332  | -0.347250 | 0.150829  |
| H      | 2.522714  | -0.520132 | 1.513231  |
| C      | 4.922264  | -0.961918 | -0.850002 |
| H      | 5.197440  | -2.749565 | -2.018596 |
| H      | 4.416040  | 0.661763  | 0.468507  |
| H      | 5.752006  | -0.437674 | -1.309144 |
| C      | 1.411515  | -2.738318 | 2.342535  |
| H      | 1.027320  | -1.722404 | 2.448800  |
| H      | 0.672940  | -3.461087 | 2.678891  |

|    |           |           |           |
|----|-----------|-----------|-----------|
| H  | 2.345116  | -2.857945 | 2.890222  |
| C  | 0.933100  | -3.767193 | 0.235716  |
| H  | 0.139280  | -4.303538 | 0.738927  |
| O  | 0.731042  | 0.443222  | 2.394120  |
| H  | 1.110323  | -3.900788 | -0.824101 |
| H  | 0.794830  | 1.162244  | 3.036301  |
| Si | -1.324022 | -1.251488 | -0.754325 |
| H  | -0.800874 | -0.984433 | -2.115879 |
| H  | -1.111720 | -2.736030 | -0.639130 |
| C  | -3.203477 | -1.190373 | -0.593564 |
| C  | -3.914019 | -2.326611 | -1.008717 |
| C  | -3.941290 | -0.118586 | -0.071867 |
| C  | -5.303094 | -2.384298 | -0.933644 |
| H  | -3.376139 | -3.187018 | -1.397667 |
| C  | -5.328541 | -0.179521 | 0.028787  |
| H  | -3.430423 | 0.776063  | 0.261699  |
| C  | -6.013983 | -1.309278 | -0.408942 |
| H  | -5.827761 | -3.270522 | -1.272932 |
| H  | -5.874669 | 0.659505  | 0.445831  |
| H  | -7.095038 | -1.352804 | -0.337984 |
| O  | -2.913756 | 3.257265  | 1.786600  |

### TS<sub>13</sub>

| Symbol | X        | Y         | Z         |
|--------|----------|-----------|-----------|
| C      | 1.392479 | -0.586995 | 2.283569  |
| H      | 2.056731 | 0.263568  | 2.085242  |
| O      | 1.249625 | -1.442344 | 1.258188  |
| Si     | 1.727122 | -1.303579 | -0.350390 |
| H      | 1.787415 | 3.174486  | -0.428270 |
| C      | 3.416108 | -0.539281 | -0.421944 |
| C      | 3.754145 | 0.339212  | -1.459486 |
| C      | 4.372550 | -0.807779 | 0.564663  |
| C      | 5.009922 | 0.934070  | -1.509098 |
| H      | 3.028693 | 0.569329  | -2.234611 |
| C      | 5.631520 | -0.213981 | 0.517714  |
| H      | 4.139709 | -1.479903 | 1.386255  |
| C      | 5.949597 | 0.658425  | -0.518100 |
| H      | 5.255676 | 1.614913  | -2.316170 |
| H      | 6.359835 | -0.427719 | 1.291625  |
| H      | 6.927375 | 1.125387  | -0.552915 |
| O      | 0.612190 | -0.558513 | -1.268377 |
| C      | 1.843399 | 2.400016  | 0.358833  |
| O      | 2.536226 | 2.556811  | 1.340557  |
| O      | 1.121522 | 1.340740  | 0.135007  |

|    |           |           |           |
|----|-----------|-----------|-----------|
| N  | -3.033930 | -1.118144 | -1.866787 |
| C  | -2.992304 | -1.368659 | -0.445001 |
| C  | -1.898907 | -2.014485 | 0.134637  |
| C  | -4.047044 | -0.922640 | 0.348499  |
| C  | -1.848132 | -2.166016 | 1.513775  |
| H  | -1.089544 | -2.408968 | -0.465520 |
| C  | -3.988445 | -1.094739 | 1.727449  |
| H  | -4.902716 | -0.423499 | -0.084220 |
| C  | -2.886807 | -1.702225 | 2.316033  |
| H  | -0.978589 | -2.631458 | 1.959243  |
| H  | -4.806827 | -0.732654 | 2.338503  |
| H  | -2.836435 | -1.818739 | 3.392077  |
| C  | -4.321467 | -0.728619 | -2.464963 |
| H  | -4.613177 | 0.256474  | -2.102493 |
| H  | -4.203133 | -0.704563 | -3.544583 |
| H  | -5.073842 | -1.465527 | -2.187650 |
| C  | -1.974199 | -1.156604 | -2.605622 |
| H  | -2.088921 | -0.996450 | -3.669367 |
| O  | 1.691283  | -2.856837 | -0.895105 |
| H  | -1.032152 | -1.505506 | -2.209571 |
| H  | 2.249038  | -3.496671 | -0.441339 |
| Si | -0.016260 | 1.026659  | -1.317561 |
| H  | 0.695982  | 2.056011  | -2.128239 |
| H  | -0.946123 | 0.577508  | -2.514750 |
| C  | -1.525503 | 1.619706  | -0.323306 |
| C  | -2.665845 | 2.030129  | -1.027356 |
| C  | -1.560496 | 1.711683  | 1.076500  |
| C  | -3.783325 | 2.542525  | -0.373271 |
| H  | -2.680749 | 1.949388  | -2.111950 |
| C  | -2.686001 | 2.195355  | 1.740369  |
| H  | -0.695752 | 1.408498  | 1.656715  |
| C  | -3.796908 | 2.621223  | 1.016868  |
| H  | -4.644956 | 2.870242  | -0.945369 |
| H  | -2.693050 | 2.245924  | 2.823975  |
| H  | -4.668325 | 3.008784  | 1.533082  |
| O  | 0.835813  | -0.768218 | 3.327797  |

### TS<sub>14</sub>

| Symbol | X        | Y         | Z        |
|--------|----------|-----------|----------|
| C      | 4.077989 | 0.331252  | 1.582184 |
| H      | 4.545803 | -0.301607 | 0.818886 |
| O      | 2.757085 | 0.499017  | 1.449381 |
| Si     | 1.622114 | -0.290786 | 0.453088 |
| H      | 3.730612 | -3.353242 | 0.200949 |

|    |           |           |           |
|----|-----------|-----------|-----------|
| C  | 0.331067  | -1.484795 | 1.112659  |
| C  | -0.108334 | -2.552295 | 0.318797  |
| C  | -0.232645 | -1.331593 | 2.385522  |
| C  | -1.100708 | -3.420516 | 0.768682  |
| H  | 0.321789  | -2.706529 | -0.666872 |
| C  | -1.199655 | -2.217008 | 2.853426  |
| H  | 0.083022  | -0.507983 | 3.017701  |
| C  | -1.645954 | -3.255225 | 2.039317  |
| H  | -1.445653 | -4.226587 | 0.130179  |
| H  | -1.614313 | -2.090230 | 3.847381  |
| H  | -2.412335 | -3.934948 | 2.394633  |
| O  | 1.566388  | 0.231443  | -1.123032 |
| C  | 3.267634  | -2.520110 | 0.751812  |
| O  | 3.277446  | -2.460248 | 1.958893  |
| O  | 2.740480  | -1.627889 | -0.051464 |
| O  | 0.478153  | 1.093167  | 0.951537  |
| H  | 0.877794  | 1.971141  | 0.893697  |
| Si | 2.583527  | 0.003443  | -2.412407 |
| H  | 2.476909  | -1.358475 | -2.977310 |
| H  | 2.168461  | 0.998172  | -3.426283 |
| C  | 4.345166  | 0.327972  | -1.871920 |
| C  | 5.286688  | -0.705062 | -1.786915 |
| C  | 4.711880  | 1.601692  | -1.416379 |
| C  | 6.554603  | -0.475581 | -1.259535 |
| H  | 5.022081  | -1.705036 | -2.117355 |
| C  | 5.975847  | 1.834613  | -0.880727 |
| H  | 4.001669  | 2.423080  | -1.465591 |
| C  | 6.897250  | 0.794194  | -0.800374 |
| H  | 7.271555  | -1.286679 | -1.197417 |
| H  | 6.239618  | 2.823154  | -0.522125 |
| H  | 7.880286  | 0.971525  | -0.378857 |
| O  | 4.696408  | 0.866721  | 2.456453  |
| H  | -2.281743 | -0.775558 | 0.616390  |
| H  | -2.709653 | 0.533243  | 1.721790  |
| C  | -2.727697 | 0.214842  | 0.678473  |
| N  | -4.078908 | 0.213058  | 0.188143  |
| C  | -5.017581 | 1.124542  | 0.834737  |
| H  | -5.674121 | 0.595236  | 1.535409  |
| H  | -4.460666 | 1.879136  | 1.385863  |
| H  | -5.636584 | 1.637585  | 0.094737  |
| C  | -4.596833 | -0.867101 | -0.526282 |
| C  | -5.988175 | -1.003411 | -0.698160 |
| C  | -3.773148 | -1.847887 | -1.115645 |
| C  | -6.519358 | -2.070108 | -1.415570 |

|   |           |           |           |
|---|-----------|-----------|-----------|
| H | -6.667951 | -0.278081 | -0.273722 |
| C | -4.321484 | -2.911218 | -1.819703 |
| H | -2.696576 | -1.791473 | -1.039705 |
| C | -5.698593 | -3.038637 | -1.980471 |
| H | -7.596169 | -2.138207 | -1.525643 |
| H | -3.652321 | -3.646063 | -2.254315 |
| H | -6.118339 | -3.868660 | -2.535392 |
| N | -1.810998 | 1.144927  | -0.064316 |
| H | -0.580317 | 1.096179  | 0.496825  |
| C | -1.615302 | 0.709361  | -1.459962 |
| H | -0.975872 | 1.428928  | -1.970133 |
| H | -1.108903 | -0.256106 | -1.442033 |
| H | -2.565849 | 0.615985  | -1.989168 |
| C | -2.234450 | 2.525999  | 0.078168  |
| C | -2.915349 | 3.203677  | -0.927956 |
| C | -1.969460 | 3.156306  | 1.294556  |
| C | -3.335115 | 4.514016  | -0.709337 |
| H | -3.126851 | 2.722087  | -1.874190 |
| C | -2.394340 | 4.461907  | 1.505262  |
| H | -1.446137 | 2.616584  | 2.077343  |
| C | -3.080784 | 5.144197  | 0.503410  |
| H | -3.867388 | 5.039091  | -1.493891 |
| H | -2.186517 | 4.946504  | 2.451987  |
| H | -3.411602 | 6.162909  | 0.667358  |

#### Aniline-TS

| Symbol | X         | Y         | Z         |
|--------|-----------|-----------|-----------|
| C      | -0.902690 | 3.302903  | -0.720173 |
| O      | -1.999884 | 3.773825  | -0.740986 |
| O      | 0.273087  | 3.514687  | -0.763129 |
| H      | 0.613988  | -1.908428 | -0.430330 |
| H      | -1.111251 | 1.910395  | -0.592982 |
| Si     | -0.312169 | 0.502017  | -0.231370 |
| H      | 0.247865  | 1.127985  | 0.983947  |
| H      | 0.420283  | 0.563883  | -1.511331 |
| N      | 0.814643  | -1.195995 | 0.273824  |
| C      | 0.404285  | -1.725492 | 1.596401  |
| H      | -0.567414 | -2.202783 | 1.486613  |
| H      | 1.133938  | -2.450146 | 1.959173  |
| H      | 0.316385  | -0.905266 | 2.309414  |
| C      | -1.937561 | -0.433239 | -0.126247 |
| C      | -2.176941 | -1.589309 | -0.879996 |
| C      | -2.951386 | 0.032841  | 0.719912  |
| C      | -3.390326 | -2.265137 | -0.783405 |

|   |           |           |           |
|---|-----------|-----------|-----------|
| H | -1.414837 | -1.972344 | -1.553711 |
| C | -4.160679 | -0.647264 | 0.828260  |
| H | -2.799086 | 0.939354  | 1.299238  |
| C | -4.381017 | -1.797807 | 0.075950  |
| H | -3.561530 | -3.156039 | -1.376953 |
| H | -4.931696 | -0.277549 | 1.494678  |
| H | -5.323840 | -2.326815 | 0.155948  |
| C | 2.212199  | -0.850741 | 0.160841  |
| C | 2.882933  | -0.241275 | 1.217820  |
| C | 2.858318  | -1.066367 | -1.054443 |
| C | 4.212456  | 0.138016  | 1.053630  |
| H | 2.382521  | -0.064445 | 2.161849  |
| C | 4.185312  | -0.684157 | -1.207190 |
| H | 2.320214  | -1.537258 | -1.870702 |
| C | 4.866888  | -0.080894 | -0.153599 |
| H | 4.734937  | 0.607594  | 1.878731  |
| H | 4.686176  | -0.860903 | -2.151668 |
| H | 5.902066  | 0.215499  | -0.273476 |

#### Carbamate acid-TS

| Symbol | X         | Y         | Z         |
|--------|-----------|-----------|-----------|
| C      | -2.048062 | -0.495345 | 2.365232  |
| H      | -3.096031 | -0.532818 | 2.652837  |
| H      | -1.602863 | 0.436867  | 2.717447  |
| H      | -1.520355 | -1.341236 | 2.799813  |
| N      | -1.982613 | -0.578365 | 0.899481  |
| C      | -3.118923 | -0.151513 | 0.127340  |
| C      | -3.800285 | -1.064895 | -0.668398 |
| C      | -3.535972 | 1.170479  | 0.229329  |
| C      | -4.911731 | -0.638860 | -1.386494 |
| H      | -3.458909 | -2.092173 | -0.721404 |
| C      | -4.655793 | 1.584214  | -0.484685 |
| H      | -2.985601 | 1.861687  | 0.858044  |
| C      | -5.340803 | 0.682643  | -1.294048 |
| H      | -5.446535 | -1.342904 | -2.012752 |
| H      | -4.987939 | 2.612894  | -0.411562 |
| H      | -6.210416 | 1.009141  | -1.852050 |
| C      | -0.854659 | -0.953312 | 0.321478  |
| O      | 0.143393  | -1.310239 | 1.003479  |
| H      | 1.759823  | -2.080208 | -0.702572 |
| H      | 2.339392  | -1.830035 | 1.767983  |
| H      | 3.618943  | -1.193459 | 0.068910  |
| C      | 4.703339  | -1.991768 | -0.217850 |
| O      | 5.560873  | -1.243978 | -0.592238 |

|    |           |           |           |
|----|-----------|-----------|-----------|
| O  | 4.423485  | -3.135712 | 0.001899  |
| Si | 2.004922  | -1.214942 | 0.476228  |
| C  | 1.923041  | 0.645860  | 0.180037  |
| C  | 2.777596  | 1.214724  | -0.774629 |
| C  | 1.042325  | 1.493067  | 0.867779  |
| C  | 2.739789  | 2.578259  | -1.049621 |
| H  | 3.487044  | 0.587609  | -1.306739 |
| C  | 1.013656  | 2.859853  | 0.605849  |
| H  | 0.377338  | 1.094461  | 1.627433  |
| C  | 1.857866  | 3.403292  | -0.358118 |
| H  | 3.402154  | 2.996391  | -1.799006 |
| H  | 0.331718  | 3.499292  | 1.154972  |
| H  | 1.831138  | 4.466812  | -0.566462 |
| O  | -0.838194 | -0.924698 | -0.997942 |
| H  | -0.008389 | -1.303122 | -1.331025 |

#### Carbamate-TS<sub>1</sub>

| Symbol | X         | Y         | Z         |
|--------|-----------|-----------|-----------|
| C      | -2.157991 | -0.855154 | 2.238715  |
| H      | -3.165623 | -1.179446 | 2.498284  |
| H      | -1.941408 | 0.081321  | 2.763424  |
| H      | -1.448272 | -1.608303 | 2.567344  |
| N      | -2.065399 | -0.714054 | 0.787858  |
| C      | -3.203432 | -0.255905 | 0.086449  |
| C      | -3.456274 | -0.644010 | -1.236917 |
| C      | -4.134914 | 0.564816  | 0.733835  |
| C      | -4.601639 | -0.205537 | -1.888254 |
| H      | -2.750913 | -1.283325 | -1.746666 |
| C      | -5.283865 | 0.991322  | 0.074037  |
| H      | -3.960071 | 0.881475  | 1.754792  |
| C      | -5.524561 | 0.614021  | -1.241631 |
| H      | -4.778652 | -0.519017 | -2.911196 |
| H      | -5.988554 | 1.628105  | 0.597043  |
| H      | -6.417987 | 0.948392  | -1.755633 |
| C      | -0.807765 | -0.754943 | 0.173472  |
| O      | 0.147545  | -1.067323 | 1.006116  |
| O      | -0.656173 | -0.512214 | -1.012636 |
| H      | 1.640236  | -2.038213 | -0.645380 |
| H      | 2.219900  | -1.737540 | 1.817995  |
| H      | 3.526858  | -1.234095 | 0.149699  |
| C      | 4.570383  | -2.360135 | -0.640438 |
| O      | 5.131285  | -1.652568 | -1.392599 |
| O      | 4.300109  | -3.368595 | -0.104056 |
| Si     | 1.938951  | -1.124661 | 0.489893  |

|   |          |          |           |
|---|----------|----------|-----------|
| C | 2.062281 | 0.769279 | 0.257580  |
| C | 3.107845 | 1.309761 | -0.503579 |
| C | 1.156007 | 1.671326 | 0.834763  |
| C | 3.238118 | 2.683579 | -0.697062 |
| H | 3.837317 | 0.641551 | -0.951981 |
| C | 1.291855 | 3.047053 | 0.666791  |
| H | 0.330572 | 1.296176 | 1.430577  |
| C | 2.331411 | 3.558075 | -0.106013 |
| H | 4.050914 | 3.070589 | -1.302211 |
| H | 0.582779 | 3.721120 | 1.135398  |
| H | 2.433915 | 4.628698 | -0.244709 |

### Carbamate-TS<sub>2</sub>

| Symbol | X         | Y         | Z         |
|--------|-----------|-----------|-----------|
| C      | 3.498378  | -0.077693 | 2.436384  |
| H      | 4.495527  | -0.075885 | 2.875936  |
| H      | 3.054917  | -1.069918 | 2.568032  |
| H      | 2.882432  | 0.651002  | 2.954638  |
| N      | 3.602782  | 0.299020  | 1.028309  |
| C      | 4.749295  | -0.110538 | 0.307595  |
| C      | 5.265029  | 0.658182  | -0.744329 |
| C      | 5.420912  | -1.280363 | 0.679277  |
| C      | 6.413077  | 0.249867  | -1.410264 |
| H      | 4.761076  | 1.568282  | -1.034931 |
| C      | 6.576014  | -1.675673 | 0.010685  |
| H      | 5.037592  | -1.890574 | 1.488020  |
| C      | 7.077952  | -0.917552 | -1.040418 |
| H      | 6.797755  | 0.859204  | -2.220558 |
| H      | 7.078541  | -2.586869 | 0.315125  |
| H      | 7.975989  | -1.226820 | -1.561970 |
| C      | 2.488493  | 0.810985  | 0.366532  |
| O      | 1.483843  | 1.047132  | 1.176358  |
| O      | 2.469163  | 1.007834  | -0.836421 |
| H      | 0.401617  | 2.797291  | -0.164416 |
| H      | -0.594743 | 1.776429  | 1.950913  |
| H      | -1.681541 | 2.173511  | 0.100117  |
| C      | -2.396246 | 3.664731  | -0.514022 |
| O      | -3.186455 | 3.225626  | -1.271063 |
| O      | -1.808488 | 4.485387  | 0.076067  |
| Si     | -0.138927 | 1.616073  | 0.545696  |
| C      | -0.537021 | 0.000770  | -0.377067 |
| C      | -1.361854 | -0.001236 | -1.509178 |
| C      | -0.058237 | -1.235945 | 0.078639  |
| C      | -1.713423 | -1.186033 | -2.152555 |

|   |           |           |           |
|---|-----------|-----------|-----------|
| H | -1.746431 | 0.940936  | -1.893313 |
| C | -0.419016 | -2.426329 | -0.547187 |
| H | 0.599309  | -1.271755 | 0.941776  |
| C | -1.254922 | -2.405252 | -1.661383 |
| H | -2.353398 | -1.158690 | -3.028053 |
| H | -0.052234 | -3.372279 | -0.163280 |
| H | -1.540620 | -3.331632 | -2.147412 |
| H | -4.300829 | 1.052101  | -0.875013 |
| N | -4.017975 | 0.802169  | 0.078498  |
| C | -4.841891 | 1.575493  | 1.056527  |
| H | -4.720521 | 2.635667  | 0.845085  |
| H | -5.880419 | 1.275802  | 0.936603  |
| H | -4.484679 | 1.340029  | 2.056588  |
| H | -3.028144 | 1.110766  | 0.164864  |
| C | -4.117200 | -0.650140 | 0.250147  |
| C | -4.966774 | -1.367029 | -0.577373 |
| C | -3.366896 | -1.253411 | 1.246866  |
| C | -5.059044 | -2.743863 | -0.402452 |
| H | -5.534171 | -0.858593 | -1.349621 |
| C | -3.468443 | -2.630597 | 1.411049  |
| H | -2.708315 | -0.656948 | 1.869947  |
| C | -4.310857 | -3.373588 | 0.588020  |
| H | -5.712511 | -3.322036 | -1.044295 |
| H | -2.881176 | -3.122035 | 2.177390  |
| H | -4.382153 | -4.446865 | 0.717948  |

### Carbamate-TS<sub>3</sub>

| Symbol | X         | Y         | Z         |
|--------|-----------|-----------|-----------|
| C      | -1.656900 | -0.257960 | -0.769248 |
| O      | -1.661534 | 0.714868  | 0.078616  |
| O      | -0.648916 | -0.669944 | -1.371301 |
| C      | 2.082547  | 3.789430  | -0.688796 |
| O      | 2.477471  | 2.817274  | -1.231617 |
| O      | 2.066811  | 4.929053  | -0.421745 |
| H      | 0.788875  | 3.214141  | 0.261418  |
| Si     | -0.304704 | 2.016519  | 0.223583  |
| H      | -1.323449 | 2.887341  | 0.860744  |
| H      | -0.139240 | 1.972322  | -1.257615 |
| N      | -2.863228 | -0.878029 | -0.989987 |
| C      | -2.866362 | -2.093670 | -1.801382 |
| H      | -2.525011 | -2.963781 | -1.232960 |
| H      | -3.879303 | -2.273393 | -2.157589 |
| H      | -2.206851 | -1.952616 | -2.654367 |
| H      | 2.194972  | 0.829280  | -1.051127 |

|   |           |           |           |
|---|-----------|-----------|-----------|
| N | 1.938344  | -0.059928 | -1.496274 |
| C | 2.157515  | 0.068293  | -2.964826 |
| H | 1.542092  | 0.890052  | -3.327290 |
| H | 3.211862  | 0.267600  | -3.147204 |
| H | 1.859069  | -0.866212 | -3.436359 |
| H | 0.901146  | -0.208167 | -1.335405 |
| C | 0.836423  | 0.933370  | 1.316604  |
| C | 2.051989  | 1.439795  | 1.806654  |
| C | 0.513203  | -0.386515 | 1.669963  |
| C | 2.905204  | 0.670774  | 2.593537  |
| H | 2.338520  | 2.463190  | 1.590635  |
| C | 1.363689  | -1.164427 | 2.453210  |
| H | -0.421613 | -0.823189 | 1.342360  |
| C | 2.566559  | -0.640658 | 2.913919  |
| H | 3.834998  | 1.096827  | 2.954227  |
| H | 1.083496  | -2.182571 | 2.701141  |
| H | 3.231612  | -1.246154 | 3.519815  |
| C | 2.682400  | -1.154550 | -0.877852 |
| C | 3.964834  | -0.922540 | -0.405587 |
| C | 2.080093  | -2.402244 | -0.793095 |
| C | 4.661216  | -1.973822 | 0.182889  |
| H | 4.405378  | 0.065818  | -0.485511 |
| C | 2.786538  | -3.445101 | -0.204644 |
| H | 1.070384  | -2.541564 | -1.163661 |
| C | 4.072874  | -3.230897 | 0.284852  |
| H | 5.661061  | -1.806179 | 0.564855  |
| H | 2.327885  | -4.423123 | -0.122738 |
| H | 4.617047  | -4.045680 | 0.747546  |
| C | -4.046957 | -0.524080 | -0.286269 |
| C | -4.481652 | 0.802662  | -0.226478 |
| C | -4.817166 | -1.525558 | 0.306690  |
| C | -5.659801 | 1.117739  | 0.438086  |
| H | -3.894220 | 1.578087  | -0.699944 |
| C | -6.002629 | -1.202709 | 0.961048  |
| H | -4.486409 | -2.556751 | 0.260388  |
| C | -6.426772 | 0.119126  | 1.034978  |
| H | -5.986365 | 2.150629  | 0.479200  |
| H | -6.589692 | -1.990743 | 1.418576  |
| H | -7.347909 | 0.370512  | 1.547379  |

#### Amide-TS

| Symbol | X        | Y         | Z        |
|--------|----------|-----------|----------|
| C      | 2.130738 | -0.978477 | 0.129408 |
| H      | 1.745083 | -1.039905 | 1.150217 |

|    |           |           |           |
|----|-----------|-----------|-----------|
| O  | 1.362710  | -1.064714 | -0.862445 |
| N  | 3.429836  | -0.816643 | -0.000882 |
| C  | 4.039318  | -0.786202 | -1.335759 |
| H  | 4.944377  | -0.185166 | -1.286663 |
| H  | 4.281624  | -1.798532 | -1.662689 |
| H  | 3.333287  | -0.339815 | -2.032264 |
| Si | -0.572786 | -1.076892 | -0.626654 |
| H  | -2.204815 | -1.153190 | -0.489994 |
| H  | -0.670937 | -1.434784 | -2.053618 |
| H  | -0.431145 | -2.143046 | 0.390361  |
| C  | -0.602494 | 0.718904  | -0.027326 |
| C  | -1.678229 | 1.145330  | 0.765661  |
| C  | 0.396216  | 1.655840  | -0.332863 |
| C  | -1.743806 | 2.446558  | 1.255123  |
| H  | -2.481282 | 0.453169  | 1.001306  |
| C  | 0.324867  | 2.963742  | 0.140126  |
| H  | 1.238846  | 1.376158  | -0.956199 |
| C  | -0.741521 | 3.359712  | 0.941686  |
| H  | -2.580428 | 2.748245  | 1.875246  |
| H  | 1.103947  | 3.672432  | -0.117536 |
| H  | -0.793379 | 4.375894  | 1.316017  |
| C  | -3.333977 | -2.068174 | -0.375190 |
| O  | -3.001568 | -3.108925 | -0.847296 |
| O  | -4.181764 | -1.419958 | 0.153503  |
| C  | 4.265049  | -0.723165 | 1.160284  |
| C  | 3.895513  | 0.109515  | 2.212678  |
| C  | 5.446312  | -1.458000 | 1.208226  |
| C  | 4.707700  | 0.181464  | 3.339306  |
| H  | 2.993544  | 0.706965  | 2.141053  |
| C  | 6.256599  | -1.366118 | 2.333600  |
| H  | 5.721826  | -2.099778 | 0.379499  |
| C  | 5.887405  | -0.553058 | 3.401911  |
| H  | 4.422720  | 0.827817  | 4.160754  |
| H  | 7.175523  | -1.938423 | 2.376444  |
| H  | 6.521902  | -0.486745 | 4.277618  |

#### DEA-CO<sub>2</sub>

| Symbol | X        | Y        | Z         |
|--------|----------|----------|-----------|
| C      | 0.000000 | 0.000000 | -0.000078 |
| O      | 0.000000 | 0.000000 | -1.154565 |
| O      | 0.000000 | 0.000000 | 1.154624  |

#### DEA

| Symbol | X | Y | Z |
|--------|---|---|---|
|--------|---|---|---|



N 0. 2.805761 -1.003329 -0.507431  
 C 0. 3.709717 -0.592490 -1.578336  
 H 0. 4.432453 -1.399005 -1.731321  
 H 3.146207 -0.495339 -2.503834  
 C 3.402139 -1.538016 0.717208  
 H 2.859993 -2.443890 0.996572  
 H 4.429353 -1.819695 0.477951  
 C 1.452923 -0.886506 -0.556560  
 O 0.745282 -1.260411 0.372095  
 C 4.442225 0.708399 -1.268943  
 H 5.079962 0.600082 -0.388684  
 H 5.075763 0.993259 -2.112307  
 H 3.728331 1.514746 -1.082084  
 C 3.378547 -0.549814 1.879198  
 H 3.843331 -0.997018 2.761584  
 H 3.922779 0.363615 1.630480  
 H 2.348928 -0.289120 2.126997  
 C 0.839290 -0.282750 -1.803196  
 H 1.277798 0.688630 -2.040150  
 H 0.981600 -0.937941 -2.665831  
 H -0.226551 -0.165070 -1.620018

**DEA-Si**

| Symbol | X           | Y         | Z         |
|--------|-------------|-----------|-----------|
| Si     | 0. 2.341794 | 0.000378  | 0.004212  |
| H      | 0. 2.828769 | 1.324028  | -0.444411 |
| H      | 0. 2.852115 | -1.057221 | -0.897266 |
| H      | 2.861450    | -0.261990 | 1.366639  |
| C      | 0.464377    | 0.000815  | -0.010886 |
| C      | -0.254653   | 1.203040  | -0.008305 |
| C      | -0.254178   | -1.202930 | -0.008765 |
| C      | -1.647144   | 1.204240  | 0.002692  |
| H      | 0.273385    | 2.151835  | -0.017236 |
| C      | -1.645373   | -1.205492 | 0.002165  |
| H      | 0.273870    | -2.152221 | -0.018480 |
| C      | -2.343528   | -0.000421 | 0.008491  |
| H      | -2.187202   | 2.144310  | 0.003803  |
| H      | -2.184901   | -2.145860 | 0.002900  |
| H      | -3.427710   | -0.001179 | 0.015067  |

**DEA-TS**

| Symbol | X           | Y         | Z         |
|--------|-------------|-----------|-----------|
| N      | 0. 2.811916 | -0.988974 | -0.593340 |
| C      | 0. 3.863637 | -0.575698 | -1.531982 |

H 0. 4.578630 -1.398382 -1.590617  
 H 3.430989 -0.451202 -2.520915  
 C 3.246151 -1.578594 0.686515  
 H 2.682605 -2.499398 0.842500  
 H 4.296430 -1.840650 0.559212  
 C 1.523489 -0.822283 -0.829911  
 O 0.700462 -1.204210 0.059751  
 C 4.550842 0.704352 -1.077877  
 H 5.057402 0.562545 -0.121005  
 H 5.297520 1.000677 -1.817140  
 H 3.823504 1.513427 -0.972620  
 C 3.072584 -0.642158 1.875611  
 H 3.518684 -1.102582 2.759843  
 H 3.569491 0.313984 1.699975  
 H 2.017756 -0.461373 2.082472  
 Si -1.217581 -1.010259 0.216031  
 H -1.409077 -1.738322 -1.059505  
 H -2.829185 -0.939978 0.432529  
 H -1.082887 -1.781708 1.468542  
 C -1.140868 0.886782 0.184191  
 C -2.284379 1.596338 -0.210456  
 C -0.000913 1.629668 0.525590  
 C -2.285975 2.986757 -0.284888  
 H -3.191937 1.054759 -0.460369  
 C -0.003198 3.021091 0.472204  
 H 0.906302 1.128845 0.846530  
 C -1.143980 3.703232 0.059070  
 H -3.180592 3.509379 -0.604718  
 H 0.888195 3.572114 0.751162  
 H -1.143525 4.786337 0.009470  
 C -4.119915 -1.753951 0.244145  
 O -4.939825 -0.916576 0.067823  
 O -3.805683 -2.890881 0.350487  
 C 1.066114 -0.208056 -2.121551  
 H 1.541818 0.762772 -2.271676  
 H 1.340166 -0.857766 -2.955751  
 H -0.011920 -0.077277 -2.119404

**DEF-CO<sub>2</sub>**

| Symbol | X           | Y        | Z         |
|--------|-------------|----------|-----------|
| C      | 0. 0.000000 | 0.000000 | -0.000078 |
| O      | 0. 0.000000 | 0.000000 | -1.154565 |
| O      | 0. 0.000000 | 0.000000 | 1.154624  |

**DEF**

| Symbol | X           | Y         | Z         |
|--------|-------------|-----------|-----------|
| N      | 0. 2.774463 | -0.977567 | -0.469517 |
| C      | 0. 3.609373 | -0.543433 | -1.582514 |
| H      | 0. 4.241041 | -1.381712 | -1.892628 |
| H      | 2.947158    | -0.305312 | -2.417106 |
| C      | 3.404998    | -1.510221 | 0.735926  |
| H      | 2.861083    | -2.410272 | 1.031236  |
| H      | 4.423091    | -1.802170 | 0.470457  |
| C      | 1.430589    | -0.908714 | -0.525813 |
| H      | 1.061432    | -0.496425 | -1.479252 |
| O      | 0.674993    | -1.263717 | 0.364306  |
| C      | 4.474610    | 0.662022  | -1.237466 |
| H      | 5.175122    | 0.429069  | -0.432153 |
| H      | 5.055343    | 0.965271  | -2.111518 |
| H      | 3.851374    | 1.502948  | -0.923974 |
| C      | 3.410905    | -0.512762 | 1.889601  |
| H      | 3.878766    | -0.959438 | 2.770229  |
| H      | 3.963720    | 0.391182  | 1.626444  |
| H      | 2.387316    | -0.235784 | 2.146932  |

**DEF-Si**

| Symbol | X           | Y         | Z         |
|--------|-------------|-----------|-----------|
| Si     | 0. 2.341770 | 0.000376  | 0.004215  |
| H      | 0. 2.828724 | 1.324028  | -0.444395 |
| H      | 0. 2.852095 | -1.057202 | -0.897266 |
| H      | 2.861427    | -0.261994 | 1.366627  |
| C      | 0.464371    | 0.000811  | -0.010885 |
| C      | -0.254646   | 1.203041  | -0.008308 |
| C      | -0.254175   | -1.202936 | -0.008764 |
| C      | -1.647142   | 1.204247  | 0.002691  |
| H      | 0.273430    | 2.151802  | -0.017246 |
| C      | -1.645374   | -1.205499 | 0.002168  |
| H      | 0.273904    | -2.152196 | -0.018481 |
| C      | -2.343528   | -0.000420 | 0.008493  |
| H      | -2.187190   | 2.144305  | 0.003798  |
| H      | -2.184897   | -2.145853 | 0.002904  |
| H      | -3.427695   | -0.001176 | 0.015069  |

**DEF-TS**

| Symbol | X           | Y         | Z         |
|--------|-------------|-----------|-----------|
| N      | 0. 2.747361 | -1.041423 | -0.403041 |
| C      | 0. 3.639936 | -0.655050 | -1.505009 |
| H      | 0. 4.507186 | -1.315937 | -1.461881 |

|    |           |           |           |
|----|-----------|-----------|-----------|
| H  | 3.117782  | -0.846416 | -2.442621 |
| C  | 3.345526  | -1.405861 | 0.888887  |
| H  | 4.285287  | -0.859281 | 0.969054  |
| H  | 2.678035  | -1.063477 | 1.679017  |
| C  | 1.452959  | -1.053036 | -0.567294 |
| H  | 1.083841  | -0.773866 | -1.559076 |
| O  | 0.648017  | -1.364053 | 0.357313  |
| C  | 4.047011  | 0.806154  | -1.395891 |
| H  | 4.553747  | 1.005567  | -0.449252 |
| H  | 4.729081  | 1.060773  | -2.209166 |
| H  | 3.166463  | 1.449136  | -1.463931 |
| C  | 3.575000  | -2.907826 | 0.977439  |
| H  | 4.051967  | -3.151866 | 1.928381  |
| H  | 2.626625  | -3.444890 | 0.917334  |
| H  | 4.224737  | -3.248413 | 0.168319  |
| Si | -1.253283 | -1.073423 | 0.138971  |
| H  | -1.190561 | -1.735911 | -1.186131 |
| H  | -2.869498 | -0.909611 | -0.011266 |
| H  | -1.442507 | -1.884450 | 1.358090  |
| C  | -1.062189 | 0.813405  | 0.192817  |
| C  | -2.070351 | 1.610400  | -0.369926 |
| C  | 0.040159  | 1.466096  | 0.765484  |
| C  | -1.974195 | 2.998977  | -0.381673 |
| H  | -2.948286 | 1.139733  | -0.802494 |
| C  | 0.131884  | 2.855791  | 0.772452  |
| H  | 0.837536  | 0.892043  | 1.225016  |
| C  | -0.871774 | 3.625348  | 0.191960  |
| H  | -2.762498 | 3.590895  | -0.833162 |
| H  | 0.989138  | 3.336468  | 1.230547  |
| H  | -0.797010 | 4.706961  | 0.190478  |
| C  | -4.113263 | -1.617289 | -0.465762 |
| O  | -4.845538 | -0.729582 | -0.759565 |
| O  | -3.901043 | -2.780021 | -0.358661 |

**Dioxane**

| Symbol | X            | Y         | Z         |
|--------|--------------|-----------|-----------|
| C      | 0. -1.163936 | 0.702755  | 0.199760  |
| C      | 0. 1.164899  | 0.701609  | 0.199940  |
| C      | 0. 1.163801  | -0.761185 | -0.200282 |
| C      | -1.164183    | -0.760029 | -0.200506 |
| H      | 2.027242     | 1.216855  | -0.225505 |
| H      | -1.202126    | 0.783892  | 1.295418  |
| H      | -2.025671    | 1.218886  | -0.225828 |
| H      | 1.201488     | -0.841044 | -1.296071 |

|   |           |           |           |
|---|-----------|-----------|-----------|
| H | 2.025787  | -1.278270 | 0.223690  |
| H | -1.201730 | -0.839776 | -1.296319 |
| H | -2.026762 | -1.276310 | 0.223233  |
| H | 1.203001  | 0.782701  | 1.295602  |
| O | -0.000572 | -1.410152 | 0.288711  |
| O | 0.000850  | 1.351611  | -0.289498 |

**Dioxane-TS**

| Symbol | X         | Y         | Z         |
|--------|-----------|-----------|-----------|
| Si     | 0.0540092 | -0.911571 | -0.147516 |
| H      | 0.2178900 | -1.202519 | -0.235740 |
| H      | 0.0350290 | -1.666873 | -1.396988 |
| H      | 0.476028  | -1.629155 | 1.140053  |
| C      | 0.868218  | 0.938714  | -0.149976 |
| C      | 2.071461  | 1.412747  | 0.391093  |
| C      | -0.026601 | 1.867962  | -0.698741 |
| C      | 2.363285  | 2.773433  | 0.402486  |
| H      | 2.795853  | 0.713221  | 0.798101  |
| C      | 0.270775  | 3.227375  | -0.701087 |
| H      | -0.964023 | 1.532398  | -1.128721 |
| C      | 1.463255  | 3.682410  | -0.145331 |
| H      | 3.295335  | 3.121880  | 0.832558  |
| H      | -0.429933 | 3.931342  | -1.135516 |
| H      | 1.691665  | 4.742140  | -0.142866 |
| C      | 3.121808  | -2.126575 | -0.010299 |
| O      | 2.647225  | -3.226427 | -0.090340 |
| O      | 4.139050  | -1.521397 | 0.192615  |
| C      | -1.951276 | -0.185252 | 1.189793  |
| C      | -2.290501 | -1.631667 | -0.693666 |
| C      | -3.664442 | -1.021413 | -0.859295 |
| C      | -3.333744 | 0.381454  | 0.959690  |
| H      | -1.855513 | -1.886722 | -1.657988 |
| H      | -1.978107 | -1.042320 | 1.868686  |
| H      | -1.267958 | 0.575004  | 1.567368  |
| H      | -3.609521 | -0.176607 | -1.558406 |
| H      | -4.343131 | -1.773533 | -1.261704 |
| H      | -3.269969 | 1.263358  | 0.308712  |
| H      | -3.764376 | 0.675405  | 1.916864  |
| H      | -2.314261 | -2.510253 | -0.042319 |
| O      | -1.415848 | -0.642659 | -0.083136 |
| O      | -4.184999 | -0.592615 | 0.385061  |

**DMAc-CO<sub>2</sub>**

| Symbol | X | Y | Z |
|--------|---|---|---|
|--------|---|---|---|

|   |          |          |           |
|---|----------|----------|-----------|
| C | 0.000000 | 0.000000 | -0.000078 |
| O | 0.000000 | 0.000000 | -1.154565 |
| O | 0.000000 | 0.000000 | 1.154624  |

**DMAc**

| Symbol | X           | Y         | Z         |
|--------|-------------|-----------|-----------|
| C      | 0.-2.252713 | -0.895943 | -0.218280 |
| C      | 0.-2.221422 | -2.269318 | 0.418914  |
| H      | 0.-1.426092 | -2.838041 | -0.057463 |
| H      | -2.024131   | -2.201977 | 1.491005  |
| H      | -3.171755   | -2.790350 | 0.284077  |
| N      | -3.203444   | -0.031245 | 0.231470  |
| C      | -3.367470   | 1.255052  | -0.423268 |
| H      | -3.493289   | 2.037295  | 0.328759  |
| H      | -2.486526   | 1.464870  | -1.023411 |
| H      | -4.250914   | 1.250574  | -1.071697 |
| C      | -4.278984   | -0.414271 | 1.130967  |
| H      | -5.154767   | -0.773543 | 0.578363  |
| H      | -3.957860   | -1.185773 | 1.826747  |
| H      | -4.575487   | 0.460711  | 1.712118  |
| O      | -1.446882   | -0.587830 | -1.086444 |

**DMAc-Si**

| Symbol | X         | Y         | Z         |
|--------|-----------|-----------|-----------|
| Si     | 0.2341794 | 0.000378  | 0.004212  |
| H      | 0.2828769 | 1.324028  | -0.444411 |
| H      | 0.2852115 | -1.057221 | -0.897266 |
| H      | 2.861450  | -0.261990 | 1.366639  |
| C      | 0.464377  | 0.000815  | -0.010886 |
| C      | -0.254653 | 1.203040  | -0.008305 |
| C      | -0.254178 | -1.202930 | -0.008765 |
| C      | -1.647144 | 1.204240  | 0.002692  |
| H      | 0.273385  | 2.151835  | -0.017236 |
| C      | -1.645373 | -1.205492 | 0.002165  |
| H      | 0.273870  | -2.152221 | -0.018480 |
| C      | -2.343528 | -0.000421 | 0.008491  |
| H      | -2.187202 | 2.144310  | 0.003803  |
| H      | -2.184901 | -2.145860 | 0.002900  |
| H      | -3.427710 | -0.001179 | 0.015067  |

**DMAc-TS**

| Symbol | X         | Y         | Z         |
|--------|-----------|-----------|-----------|
| N      | 0.2771670 | -0.915959 | -0.374187 |
| C      | 0.3890639 | -0.494025 | -1.210510 |

|    |           |           |           |
|----|-----------|-----------|-----------|
| H  | 0.4448951 | -1.373466 | -1.537677 |
| H  | 3.546532  | 0.057242  | -2.079389 |
| C  | 3.106074  | -1.588636 | 0.881981  |
| H  | 2.788482  | -2.631840 | 0.849656  |
| H  | 4.184044  | -1.539919 | 1.016789  |
| C  | 1.500933  | -0.769144 | -0.695669 |
| O  | 0.635498  | -1.216263 | 0.120477  |
| Si | -1.289463 | -1.014434 | 0.182727  |
| H  | -1.421335 | -1.675647 | -1.135377 |
| H  | -2.911659 | -0.922933 | 0.312462  |
| H  | -1.234054 | -1.851150 | 1.398116  |
| C  | -1.177466 | 0.875883  | 0.252726  |
| C  | -2.231527 | 1.635188  | -0.273958 |
| C  | -0.087794 | 1.563767  | 0.805366  |
| C  | -2.189517 | 3.026679  | -0.276268 |
| H  | -3.101850 | 1.131487  | -0.684884 |
| C  | -0.051187 | 2.955731  | 0.826432  |
| H  | 0.744110  | 1.013969  | 1.234064  |
| C  | -1.098285 | 3.690177  | 0.277002  |
| H  | -3.010990 | 3.591919  | -0.702155 |
| H  | 0.796454  | 3.466509  | 1.269654  |
| H  | -1.065924 | 4.773890  | 0.284635  |
| C  | -4.191084 | -1.700447 | -0.030108 |
| O  | -4.976801 | -0.840813 | -0.250195 |
| O  | -3.909455 | -2.847630 | 0.060195  |
| C  | 1.115847  | -0.097585 | -1.980976 |
| H  | 1.463509  | 0.937657  | -1.981347 |
| H  | 1.573626  | -0.615137 | -2.825761 |
| H  | 0.036888  | -0.108906 | -2.104916 |
| H  | 2.609370  | -1.093867 | 1.716571  |
| H  | 4.547275  | 0.147169  | -0.621050 |

#### DMSO-CO<sub>2</sub>

| Symbol | X        | Y        | Z         |
|--------|----------|----------|-----------|
| C      | 0.000000 | 0.000000 | -0.000078 |
| O      | 0.000000 | 0.000000 | -1.154565 |
| O      | 0.000000 | 0.000000 | 1.154624  |

#### DMSO

| Symbol | X         | Y         | Z         |
|--------|-----------|-----------|-----------|
| S      | 0.2273343 | -0.807310 | 0.483683  |
| C      | 0.3539863 | 0.361497  | -0.048607 |
| H      | 0.3051784 | 1.324549  | -0.197554 |
| H      | 4.305596  | 0.449202  | 0.723217  |

|   |          |           |           |
|---|----------|-----------|-----------|
| H | 3.964892 | 0.004355  | -0.987921 |
| C | 3.345206 | -2.255473 | 0.569297  |
| H | 3.790103 | -2.415012 | -0.414107 |
| H | 4.112096 | -2.099231 | 1.329055  |
| H | 2.720420 | -3.105631 | 0.842887  |
| O | 1.368828 | -1.022875 | -0.715446 |

#### DMSO-Si

| Symbol | X         | Y         | Z         |
|--------|-----------|-----------|-----------|
| Si     | 0.2341579 | 0.000375  | 0.004192  |
| H      | 0.2828367 | 1.324025  | -0.444323 |
| H      | 0.2851881 | -1.057082 | -0.897298 |
| H      | 2.861190  | -0.262018 | 1.366529  |
| C      | 0.464373  | 0.000783  | -0.010874 |
| C      | -0.254564 | 1.203005  | -0.008300 |
| C      | -0.254121 | -1.202942 | -0.008732 |
| C      | -1.647013 | 1.204213  | 0.002675  |
| H      | 0.273500  | 2.151755  | -0.017222 |
| C      | -1.645274 | -1.205467 | 0.002174  |
| H      | 0.273908  | -2.152208 | -0.018390 |
| C      | -2.343384 | -0.000413 | 0.008468  |
| H      | -2.187041 | 2.144255  | 0.003772  |
| H      | -2.184801 | -2.145791 | 0.002923  |
| H      | -3.427527 | -0.001156 | 0.015028  |

#### DMSO-TS

| Symbol | X           | Y         | Z         |
|--------|-------------|-----------|-----------|
| Si     | 0.-0.490446 | -0.970021 | -0.610055 |
| H      | 0.-2.089411 | -1.290427 | -0.592017 |
| H      | 0.-0.411440 | -1.408876 | -2.019525 |
| H      | -0.286845   | -1.941327 | 0.495708  |
| C      | -0.840129   | 0.826411  | -0.128531 |
| C      | -1.926572   | 1.120296  | 0.706919  |
| C      | -0.057308   | 1.894571  | -0.587511 |
| C      | -2.205326   | 2.427668  | 1.093817  |
| H      | -2.568528   | 0.315537  | 1.054160  |
| C      | -0.344521   | 3.207532  | -0.220652 |
| H      | 0.781105    | 1.702622  | -1.249224 |
| C      | -1.414307   | 3.474969  | 0.628282  |
| H      | -3.043204   | 2.630700  | 1.751399  |
| H      | 0.267799    | 4.019865  | -0.596360 |
| H      | -1.634331   | 4.495156  | 0.921918  |
| C      | -3.083693   | -2.434722 | -0.361908 |
| O      | -2.558774   | -3.411970 | -0.778477 |

|   |           |           |           |
|---|-----------|-----------|-----------|
| O | -4.007172 | -1.891699 | 0.145394  |
| S | 2.233704  | -0.411592 | 0.581807  |
| C | 3.379224  | 0.866836  | 0.074702  |
| H | 2.828156  | 1.802998  | 0.002067  |
| H | 4.148751  | 0.944859  | 0.844374  |
| H | 3.807312  | 0.578660  | -0.885343 |
| C | 3.349314  | -1.811015 | 0.634759  |
| H | 3.862546  | -1.880142 | -0.324154 |
| H | 4.052533  | -1.655104 | 1.453955  |
| H | 2.743651  | -2.696912 | 0.822771  |
| O | 1.406511  | -0.685533 | -0.731554 |

#### Gvl-CO<sub>2</sub>

| Symbol | X        | Y        | Z         |
|--------|----------|----------|-----------|
| C      | 0.000000 | 0.000000 | -0.000078 |
| O      | 0.000000 | 0.000000 | -1.154565 |
| O      | 0.000000 | 0.000000 | 1.154624  |

#### Gvl

| Symbol | X           | Y         | Z         |
|--------|-------------|-----------|-----------|
| O      | 0.-0.059053 | -0.946518 | 0.162525  |
| C      | 0.1046940   | -0.035892 | 0.406545  |
| C      | 0.0565267   | 1.301122  | -0.160964 |
| C      | -0.942819   | 1.216995  | 0.050616  |
| H      | 1.035845    | 2.144758  | 0.340845  |
| H      | 0.799998    | 1.351176  | -1.226967 |
| H      | -1.236413   | 1.563470  | 1.045469  |
| H      | -1.548644   | 1.739276  | -0.686539 |
| C      | -1.210510   | -0.274383 | -0.011781 |
| O      | -2.257184   | -0.835970 | -0.173178 |
| C      | 2.291838    | -0.601396 | -0.233746 |
| H      | 3.128675    | 0.080842  | -0.072126 |
| H      | 2.545400    | -1.570565 | 0.196876  |
| H      | 2.137435    | -0.718396 | -1.308238 |
| H      | 1.163306    | 0.030662  | 1.491887  |

#### Gvl-Si

| Symbol | X         | Y         | Z         |
|--------|-----------|-----------|-----------|
| Si     | 0.2341770 | 0.000376  | 0.004215  |
| H      | 0.2828724 | 1.324028  | -0.444395 |
| H      | 0.2852095 | -1.057202 | -0.897266 |
| H      | 2.861427  | -0.261994 | 1.366627  |
| C      | 0.464371  | 0.000811  | -0.010885 |
| C      | -0.254646 | 1.203041  | -0.008308 |

|   |           |           |           |
|---|-----------|-----------|-----------|
| C | -0.254175 | -1.202936 | -0.008764 |
| C | -1.647142 | 1.204247  | 0.002691  |
| H | 0.273430  | 2.151802  | -0.017246 |
| C | -1.645374 | -1.205499 | 0.002168  |
| H | 0.273904  | -2.152196 | -0.018481 |
| C | -2.343528 | -0.000420 | 0.008493  |
| H | -2.187190 | 2.144305  | 0.003798  |
| H | -2.184897 | -2.145853 | 0.002904  |
| H | -3.427695 | -0.001176 | 0.015069  |

#### Gvl-TS

| Symbol | X         | Y         | Z         |
|--------|-----------|-----------|-----------|
| O      | 0.2614255 | 0.194209  | -0.185457 |
| C      | 0.4082539 | -0.006994 | -0.229260 |
| C      | 0.4263356 | -1.402789 | 0.362763  |
| C      | 2.956748  | -2.100428 | -0.011396 |
| H      | 5.145221  | -1.893312 | -0.043846 |
| H      | 4.359302  | -1.331728 | 1.448357  |
| H      | 2.995164  | -2.544332 | -1.012081 |
| H      | 2.601360  | -2.852297 | 0.690208  |
| Si     | -0.443673 | 0.539164  | -0.209208 |
| H      | -1.431644 | 1.866464  | -0.355830 |
| H      | 0.144480  | 0.864544  | -1.521353 |
| H      | 0.168205  | 1.104695  | 1.006536  |
| C      | -1.951855 | -0.577049 | -0.056398 |
| C      | -3.152526 | -0.019260 | 0.407785  |
| C      | -1.945936 | -1.935590 | -0.402362 |
| C      | -4.301333 | -0.793738 | 0.538967  |
| H      | -3.196581 | 1.035161  | 0.664488  |
| C      | -3.098662 | -2.707507 | -0.288316 |
| H      | -1.036038 | -2.400430 | -0.761862 |
| C      | -4.276846 | -2.140012 | 0.187894  |
| H      | -5.215858 | -0.343910 | 0.908584  |
| H      | -3.074649 | -3.754739 | -0.568070 |
| H      | -5.172407 | -2.743771 | 0.282121  |
| C      | -1.449648 | 3.246666  | -0.139766 |
| O      | -2.558189 | 3.496257  | 0.236191  |
| O      | -0.372704 | 3.690922  | -0.408291 |
| C      | 2.004842  | -0.950588 | -0.087251 |
| O      | 0.771762  | -1.025629 | -0.073894 |
| C      | 4.737551  | 1.121308  | 0.519935  |
| H      | 5.818849  | 0.968212  | 0.504431  |
| H      | 4.517050  | 2.082949  | 0.054779  |
| H      | 4.400903  | 1.133632  | 1.558617  |

H 4.337687 0.010369 -1.290128

#### MBO-CO<sub>2</sub>

| Symbol | X        | Y        | Z         |
|--------|----------|----------|-----------|
| C      | 0.000000 | 0.000000 | -0.000078 |
| O      | 0.000000 | 0.000000 | -1.154565 |
| O      | 0.000000 | 0.000000 | 1.154624  |

#### MBO

| Symbol | X           | Y         | Z         |
|--------|-------------|-----------|-----------|
| C      | 0.-2.405186 | -0.272015 | 0.022377  |
| C      | 0.-2.696495 | -1.720152 | -0.290827 |
| H      | 0.-1.825874 | -2.328519 | -0.050396 |
| H      | -3.572678   | -2.078024 | 0.254293  |
| H      | -2.916737   | -1.815573 | -1.358544 |
| C      | -4.585976   | 0.471741  | -1.045922 |
| H      | -5.364722   | 1.236689  | -1.000621 |
| H      | -4.108062   | 0.532337  | -2.026932 |
| H      | -5.071137   | -0.504134 | -0.959593 |
| C      | -4.256802   | 0.548790  | 1.456433  |
| H      | -5.062109   | 1.281196  | 1.549606  |
| H      | -4.691197   | -0.447399 | 1.577829  |
| H      | -3.545510   | 0.717309  | 2.268298  |
| O      | -1.277209   | 0.111642  | 0.236132  |
| C      | -3.581278   | 0.690119  | 0.085234  |
| H      | -3.148537   | 1.690955  | 0.009895  |

#### MBO-Si

| Symbol | X         | Y         | Z         |
|--------|-----------|-----------|-----------|
| Si     | 0.2341372 | 0.000905  | 0.005129  |
| H      | 0.2837683 | 1.281812  | -0.546431 |
| H      | 0.2847769 | -1.128592 | -0.807098 |
| H      | 2.858279  | -0.149976 | 1.385661  |
| C      | 0.464132  | 0.001541  | -0.014221 |
| C      | -0.255329 | 1.203276  | 0.012762  |
| C      | -0.253693 | -1.201970 | -0.034665 |
| C      | -1.647519 | 1.203709  | 0.026601  |
| H      | 0.272211  | 2.152394  | 0.019901  |
| C      | -1.645213 | -1.205336 | -0.020729 |
| H      | 0.275062  | -2.150205 | -0.065084 |
| C      | -2.343635 | -0.001273 | 0.010698  |
| H      | -2.187992 | 2.143298  | 0.046409  |
| H      | -2.184302 | -2.145772 | -0.037731 |
| H      | -3.427754 | -0.002476 | 0.019421  |

#### MBO-TS

| Symbol | X         | Y         | Z         |
|--------|-----------|-----------|-----------|
| Si     | 0.0429903 | -0.745879 | -0.075571 |
| H      | 0.1870912 | -1.604167 | -0.212658 |
| H      | 0.0146352 | -1.445786 | 1.189615  |
| H      | 0.004200  | -1.368365 | -1.342220 |
| C      | 1.397975  | 0.866454  | -0.059714 |
| C      | 2.757849  | 0.830230  | 0.284906  |
| C      | 0.835803  | 2.105331  | -0.399378 |
| C      | 3.524566  | 1.991366  | 0.303851  |
| H      | 3.230699  | -0.115107 | 0.534564  |
| C      | 1.605435  | 3.264962  | -0.394313 |
| H      | -0.211029 | 2.172404  | -0.669019 |
| C      | 2.949666  | 3.211340  | -0.038206 |
| H      | 4.571730  | 1.940787  | 0.579668  |
| H      | 1.152702  | 4.211839  | -0.666151 |
| H      | 3.546969  | 4.116089  | -0.030260 |
| C      | 2.382016  | -2.835953 | -0.023013 |
| O      | 1.515240  | -3.659942 | -0.134090 |
| O      | 3.554594  | -2.683411 | 0.191178  |
| C      | -2.435645 | -0.269875 | -0.014537 |
| C      | -2.682975 | -1.719717 | -0.247180 |
| H      | -1.943069 | -2.338623 | 0.260733  |
| H      | -3.688217 | -2.007873 | 0.053056  |
| H      | -2.584673 | -1.894027 | -1.326306 |
| C      | -4.588833 | 0.510059  | -1.017876 |
| H      | -5.366114 | 1.270005  | -0.918711 |
| H      | -4.111089 | 0.633655  | -1.992052 |
| H      | -5.068610 | -0.470424 | -0.983759 |
| C      | -4.248893 | 0.451562  | 1.494220  |
| H      | -5.042167 | 1.190172  | 1.623269  |
| H      | -4.695293 | -0.543596 | 1.553724  |
| H      | -3.533983 | 0.567790  | 2.311279  |
| O      | -1.286009 | 0.191073  | 0.058306  |
| C      | -3.584789 | 0.681369  | 0.126198  |
| H      | -3.159176 | 1.686551  | 0.101558  |

#### THF-CO<sub>2</sub>

| Symbol | X        | Y        | Z         |
|--------|----------|----------|-----------|
| C      | 0.000000 | 0.000000 | -0.000078 |
| O      | 0.000000 | 0.000000 | -1.154565 |
| O      | 0.000000 | 0.000000 | 1.154624  |

**THF**

| Symbol | X            | Y         | Z         |
|--------|--------------|-----------|-----------|
| C      | 0. -1.170009 | -0.411823 | -0.122477 |
| O      | 0. -0.011837 | -1.245517 | -0.024282 |
| C      | 0. 1.152251  | -0.437445 | 0.153393  |
| C      | 0. 0.742092  | 0.975692  | -0.246427 |
| C      | -0.711205    | 1.001697  | 0.232351  |
| H      | -1.551487    | -0.453930 | -1.148441 |
| H      | -1.939309    | -0.793686 | 0.551560  |
| H      | 1.461774     | -0.467715 | 1.204985  |
| H      | 1.955970     | -0.848061 | -0.459698 |
| H      | 1.366855     | 1.742121  | 0.211662  |
| H      | 0.783577     | 1.090590  | -1.332623 |
| H      | -0.745703    | 1.155522  | 1.313810  |
| H      | -1.315753    | 1.770572  | -0.248039 |

**THF-Si**

| Symbol | X           | Y         | Z         |
|--------|-------------|-----------|-----------|
| Si     | 0. 2.340812 | 0.000903  | 0.005522  |
| H      | 0. 2.837542 | 1.279287  | -0.551669 |
| H      | 0. 2.847117 | -1.132176 | -0.801811 |
| H      | 2.858278    | -0.143762 | 1.386425  |
| C      | 0.463980    | 0.001519  | -0.014297 |
| C      | -0.255459   | 1.202870  | 0.013851  |
| C      | -0.253824   | -1.201568 | -0.036125 |
| C      | -1.647310   | 1.203403  | 0.027923  |
| H      | 0.272327    | 2.151787  | 0.021396  |
| C      | -1.645042   | -1.205063 | -0.021946 |
| H      | 0.275183    | -2.149534 | -0.068166 |
| C      | -2.343285   | -0.001313 | 0.010990  |
| H      | -2.187787   | 2.142884  | 0.048636  |
| H      | -2.184136   | -2.145392 | -0.040017 |
| H      | -3.427326   | -0.002512 | 0.019910  |

**THF-TS**

| Symbol | X            | Y         | Z         |
|--------|--------------|-----------|-----------|
| C      | 0. -2.598982 | -1.021193 | -1.011309 |
| O      | 0. -1.618089 | -0.798810 | 0.054906  |
| C      | 0. -2.254422 | -0.291135 | 1.271137  |
| C      | -3.617067    | 0.166986  | 0.788840  |
| C      | -3.934852    | -0.853274 | -0.308341 |
| H      | -2.427023    | -0.264711 | -1.778917 |
| H      | -2.424939    | -2.015341 | -1.418148 |
| H      | -2.314145    | -1.120298 | 1.977782  |

|    |           |           |           |
|----|-----------|-----------|-----------|
| H  | -1.620955 | 0.501735  | 1.667798  |
| H  | -4.347602 | 0.166293  | 1.596599  |
| H  | -3.551076 | 1.174258  | 0.370622  |
| H  | -4.248465 | -1.800517 | 0.134807  |
| H  | -4.705514 | -0.513230 | -0.998600 |
| Si | 0.270569  | -1.009098 | -0.113710 |
| H  | 1.944726  | -1.300991 | -0.337355 |
| H  | 0.067999  | -1.761082 | -1.363378 |
| H  | 0.334414  | -1.719768 | 1.174143  |
| C  | 0.649967  | 0.834030  | -0.120113 |
| C  | 1.925253  | 1.274782  | 0.261564  |
| C  | -0.297062 | 1.795107  | -0.499788 |
| C  | 2.236314  | 2.631038  | 0.278173  |
| H  | 2.688733  | 0.553836  | 0.539874  |
| C  | 0.017104  | 3.150534  | -0.497169 |
| H  | -1.293223 | 1.493259  | -0.806679 |
| C  | 1.283704  | 3.570704  | -0.102637 |
| H  | 3.225764  | 2.952111  | 0.582882  |
| H  | -0.726963 | 3.877774  | -0.801532 |
| H  | 1.527878  | 4.626855  | -0.095400 |
| C  | 2.823998  | -2.197216 | -0.056573 |
| O  | 2.385432  | -3.307073 | -0.238649 |
| O  | 3.829460  | -1.626916 | 0.296822  |

**SI**

| Symbol | X         | Y         | Z         |
|--------|-----------|-----------|-----------|
| C      | 1.100327  | -0.065434 | 0.375178  |
| C      | 0.552464  | 1.300081  | -0.063946 |
| H      | 0.953491  | 2.117914  | 0.532915  |
| H      | 0.767216  | 1.482035  | -1.121082 |
| C      | -1.205385 | -0.225483 | 0.061051  |
| O      | -2.325191 | -0.693598 | -0.000197 |
| H      | 1.310753  | -0.072900 | 1.449431  |
| H      | 2.001052  | -0.341850 | -0.171154 |
| N      | -0.877131 | 1.110572  | 0.160739  |
| H      | -1.541453 | 1.777562  | -0.204649 |
| N      | -0.022674 | -0.932916 | 0.044014  |
| H      | -0.049437 | -1.885158 | 0.379286  |

**SI-TS**

| Symbol | X         | Y        | Z         |
|--------|-----------|----------|-----------|
| Si     | -0.404576 | 0.513626 | -0.091212 |
| H      | -1.356381 | 1.834323 | -0.109737 |
| H      | 0.177405  | 0.932550 | -1.389703 |

|   |           |           |           |
|---|-----------|-----------|-----------|
| H | 0.260170  | 1.016630  | 1.133260  |
| C | -1.926923 | -0.605304 | 0.001288  |
| C | -3.159832 | -0.033048 | 0.349397  |
| C | -1.902020 | -1.979848 | -0.278304 |
| C | -4.318425 | -0.800699 | 0.428608  |
| H | -3.220237 | 1.030895  | 0.556708  |
| C | -3.061362 | -2.747880 | -0.214575 |
| H | -0.968123 | -2.457182 | -0.546301 |
| C | -4.271851 | -2.161561 | 0.143253  |
| H | -5.256832 | -0.334450 | 0.707195  |
| H | -3.017877 | -3.807373 | -0.441574 |
| H | -5.173540 | -2.761313 | 0.197486  |
| C | -1.339349 | 3.342144  | -0.105688 |
| O | -2.488651 | 3.626818  | -0.023178 |
| O | -0.201221 | 3.667501  | -0.185452 |
| C | 4.218144  | -1.668916 | 0.028701  |
| C | 4.173319  | -0.277229 | -0.619528 |
| H | 4.864022  | 0.422825  | -0.156204 |
| H | 4.363436  | -0.331007 | -1.693669 |
| C | 2.027160  | -0.981911 | -0.162981 |
| O | 0.769655  | -1.023458 | -0.066342 |
| H | 4.537007  | -1.612993 | 1.072020  |
| H | 4.856066  | -2.360802 | -0.515704 |
| N | 2.779878  | 0.111435  | -0.374259 |
| H | 2.384076  | 0.945041  | -0.788300 |
| N | 2.810131  | -2.064960 | -0.050737 |
| H | 2.452825  | -2.899051 | 0.395246  |

## S2

| Symbol | X         | Y         | Z         |
|--------|-----------|-----------|-----------|
| C      | 1.052767  | -0.024267 | 0.514825  |
| C      | 0.572998  | 1.308070  | -0.076190 |
| C      | -0.951206 | 1.176711  | -0.047336 |
| H      | 0.946570  | 2.164453  | 0.483097  |
| H      | 0.917698  | 1.389875  | -1.108739 |
| H      | -1.371236 | 1.526563  | 0.901160  |
| H      | -1.468037 | 1.689982  | -0.857350 |
| C      | -1.194679 | -0.323199 | -0.118443 |
| O      | -2.256716 | -0.877490 | -0.344244 |
| H      | 1.153194  | 0.023559  | 1.606285  |
| H      | 2.003033  | -0.360187 | 0.095307  |
| N      | -0.016262 | -0.942097 | 0.147691  |
| C      | 0.101760  | -2.363166 | 0.368664  |
| H      | 0.244818  | -2.583585 | 1.432125  |

|   |           |           |           |
|---|-----------|-----------|-----------|
| H | -0.815316 | -2.838838 | 0.024306  |
| H | 0.950851  | -2.764404 | -0.189584 |

## S2-TS

| Symbol | X         | Y         | Z         |
|--------|-----------|-----------|-----------|
| Si     | -0.412606 | 0.537704  | -0.156824 |
| H      | -1.369423 | 1.853936  | -0.089449 |
| H      | 0.041674  | 0.929491  | -1.510700 |
| H      | 0.343901  | 1.051948  | 1.007900  |
| C      | -1.916541 | -0.590326 | 0.057583  |
| C      | -3.192186 | -0.068199 | -0.203899 |
| C      | -1.833107 | -1.924688 | 0.482269  |
| C      | -4.337092 | -0.847871 | -0.063821 |
| H      | -3.295575 | 0.966050  | -0.518183 |
| C      | -2.976767 | -2.702949 | 0.639801  |
| H      | -0.865045 | -2.362823 | 0.691697  |
| C      | -4.231468 | -2.168325 | 0.361859  |
| H      | -5.310357 | -0.421812 | -0.280442 |
| H      | -2.887341 | -3.729749 | 0.976980  |
| H      | -5.121271 | -2.776822 | 0.478812  |
| C      | -1.389558 | 3.337231  | -0.442115 |
| O      | -2.545999 | 3.567987  | -0.568151 |
| O      | -0.258246 | 3.690921  | -0.452043 |
| C      | 4.199071  | -1.777166 | -0.270840 |
| C      | 4.278698  | -0.266972 | -0.521231 |
| C      | 2.898937  | 0.247980  | -0.095062 |
| H      | 5.092338  | 0.197651  | 0.031290  |
| H      | 4.425478  | -0.081243 | -1.585784 |
| H      | 2.868620  | 0.539540  | 0.959858  |
| H      | 2.532320  | 1.086346  | -0.686991 |
| C      | 2.022223  | -0.967046 | -0.249467 |
| O      | 0.760537  | -1.003777 | -0.232549 |
| H      | 4.542417  | -2.058622 | 0.728702  |
| H      | 4.735829  | -2.369929 | -1.011323 |
| N      | 2.761595  | -2.048710 | -0.373381 |
| C      | 2.245516  | -3.402653 | -0.434450 |
| H      | 2.476270  | -3.927971 | 0.495161  |
| H      | 1.167755  | -3.367306 | -0.578706 |
| H      | 2.713097  | -3.926385 | -1.269045 |

## S3

| Symbol | X         | Y        | Z         |
|--------|-----------|----------|-----------|
| S      | 0.137129  | 0.418746 | -0.380657 |
| C      | -1.074478 | 0.089621 | 0.919577  |



|   |           |           |           |
|---|-----------|-----------|-----------|
| H | -1.947782 | 0.708203  | 0.710328  |
| H | -1.348944 | -0.965854 | 0.898558  |
| H | -0.628128 | 0.362815  | 1.876656  |
| O | 0.629159  | 1.830345  | -0.134302 |
| C | 1.423053  | -0.680526 | 0.235902  |
| C | 1.387597  | -2.040037 | -0.061691 |
| C | 2.448734  | -0.138979 | 0.995731  |
| C | 2.385099  | -2.870517 | 0.424808  |
| H | 0.588502  | -2.453164 | -0.669218 |
| C | 3.453738  | -0.967846 | 1.478585  |
| H | 2.456134  | 0.927607  | 1.191289  |
| C | 3.419340  | -2.334020 | 1.196412  |
| H | 2.383793  | -3.932439 | 0.210609  |
| H | 4.265451  | -0.559044 | 2.072103  |
| O | 4.370458  | -3.189213 | 1.639337  |
| H | 5.025184  | -2.702834 | 2.156384  |

### S3-TS

| Symbol | X         | Y         | Z         |
|--------|-----------|-----------|-----------|
| Si     | 0.622695  | -0.944150 | 0.574521  |
| H      | 2.246792  | -0.824924 | 0.515705  |
| H      | 0.694599  | -1.483086 | 1.948312  |
| H      | 0.655906  | -1.853091 | -0.599669 |
| C      | 0.463154  | 0.909966  | 0.228971  |
| C      | 1.387270  | 1.539426  | -0.615668 |
| C      | -0.546875 | 1.697003  | 0.799204  |
| C      | 1.292967  | 2.897858  | -0.903328 |
| H      | 2.196629  | 0.960109  | -1.051123 |
| C      | -0.633644 | 3.061458  | 0.531943  |
| H      | -1.269777 | 1.243527  | 1.469644  |
| C      | 0.281847  | 3.662381  | -0.326946 |
| H      | 2.011654  | 3.361312  | -1.569911 |
| H      | -1.416143 | 3.653795  | 0.993160  |
| H      | 0.211092  | 4.722525  | -0.542653 |
| C      | 3.523615  | -1.654942 | 0.443220  |
| O      | 3.210568  | -2.771579 | 0.690474  |
| O      | 4.348934  | -0.850749 | 0.165181  |
| S      | -2.191899 | -0.995423 | -0.545086 |
| C      | -3.693430 | -0.343653 | 0.184335  |
| H      | -3.482641 | 0.675888  | 0.505149  |
| H      | -4.463466 | -0.349482 | -0.587778 |
| H      | -3.970369 | -0.977484 | 1.026393  |
| O      | -1.284651 | -1.184711 | 0.729441  |
| C      | -2.698497 | -2.639808 | -0.975861 |

|   |           |           |           |
|---|-----------|-----------|-----------|
| C | -2.695934 | -2.994048 | -2.319861 |
| C | -3.067988 | -3.547617 | 0.017338  |
| C | -3.090371 | -4.273904 | -2.684490 |
| H | -2.390900 | -2.284069 | -3.080425 |
| C | -3.450294 | -4.823692 | -0.346572 |
| H | -3.041039 | -3.262301 | 1.062919  |
| C | -3.466540 | -5.187192 | -1.699281 |
| H | -3.096600 | -4.567399 | -3.728739 |
| H | -3.738207 | -5.554954 | 0.398614  |
| O | -3.851690 | -6.446122 | -1.990587 |
| H | -3.818171 | -6.585765 | -2.946312 |

### S4

| Symbol | X         | Y         | Z         |
|--------|-----------|-----------|-----------|
| S      | 0.020633  | 0.355464  | -0.173978 |
| C      | -1.272475 | -0.907238 | -0.122664 |
| H      | -2.192824 | -0.438076 | -0.470550 |
| H      | -0.993334 | -1.726686 | -0.785390 |
| H      | -1.377374 | -1.245505 | 0.908891  |
| O      | -0.262650 | 1.307994  | 0.967983  |
| C      | 1.356725  | -0.734119 | 0.401632  |
| C      | 1.845406  | -0.570093 | 1.686280  |
| C      | 2.771171  | -2.430236 | -0.093055 |
| C      | 2.876959  | -1.418045 | 2.075348  |
| H      | 1.425039  | 0.190288  | 2.332377  |
| C      | 3.348051  | -2.362804 | 1.171438  |
| H      | 3.118100  | -3.153590 | -0.823144 |
| H      | 3.305551  | -1.341714 | 3.067776  |
| H      | 4.150990  | -3.039266 | 1.435018  |
| N      | 1.783865  | -1.620184 | -0.483684 |

### S4-TS

| Symbol | X         | Y         | Z         |
|--------|-----------|-----------|-----------|
| Si     | 0.698172  | -0.933830 | 0.503197  |
| H      | 2.326720  | -0.779670 | 0.454175  |
| H      | 0.782786  | -1.533286 | 1.849763  |
| H      | 0.752106  | -1.797199 | -0.702363 |
| C      | 0.503334  | 0.927267  | 0.237124  |
| C      | 1.451302  | 1.617970  | -0.530391 |
| C      | -0.557507 | 1.659982  | 0.787955  |
| C      | 1.330696  | 2.984522  | -0.764173 |
| H      | 2.299552  | 1.081623  | -0.945980 |
| C      | -0.672239 | 3.031238  | 0.572073  |
| H      | -1.297339 | 1.160193  | 1.404616  |

|   |           |           |           |
|---|-----------|-----------|-----------|
| C | 0.267594  | 3.693998  | -0.211741 |
| H | 2.069103  | 3.496697  | -1.370818 |
| H | -1.495328 | 3.580706  | 1.015263  |
| H | 0.175289  | 4.759925  | -0.386938 |
| C | 3.589183  | -1.530765 | 0.238524  |
| O | 3.355730  | -2.674601 | 0.462377  |
| O | 4.367907  | -0.690142 | -0.077767 |
| S | -2.116908 | -1.043615 | -0.629241 |
| C | -3.625740 | -0.346567 | 0.045611  |
| H | -3.430405 | 0.703435  | 0.259186  |
| H | -4.395856 | -0.443301 | -0.720467 |
| H | -3.881934 | -0.903694 | 0.946179  |
| O | -1.210724 | -1.223899 | 0.638276  |
| C | -2.704368 | -2.721086 | -0.959957 |
| C | -2.233967 | -3.792235 | -0.224560 |
| C | -4.045146 | -3.970780 | -2.279133 |
| C | -2.737903 | -5.041354 | -0.579636 |
| H | -1.521255 | -3.656569 | 0.578157  |
| C | -3.655070 | -5.132223 | -1.617614 |
| H | -4.758031 | -4.005389 | -3.095176 |
| H | -2.414839 | -5.927644 | -0.047064 |
| H | -4.066158 | -6.087071 | -1.918710 |
| N | -3.568711 | -2.766991 | -1.957379 |

### S5

| Symbol | X         | Y         | Z         |
|--------|-----------|-----------|-----------|
| P      | 1.482355  | -0.490032 | -0.241918 |
| O      | 2.186157  | 0.187221  | -1.374718 |
| C      | 1.847491  | -2.256647 | -0.152553 |
| H      | 2.905066  | -2.354493 | 0.106173  |
| H      | 1.246006  | -2.752868 | 0.611107  |
| H      | 1.684614  | -2.737016 | -1.118166 |
| N      | -0.194516 | -0.397754 | -0.193290 |
| N      | 1.906015  | 0.207723  | 1.228883  |
| C      | -0.946665 | -1.273761 | -1.091357 |
| H      | -0.601281 | -2.304000 | -1.009183 |
| H      | -1.998401 | -1.248951 | -0.797530 |
| H      | -0.876334 | -0.956014 | -2.140131 |
| C      | -0.758501 | 0.952366  | -0.148250 |
| H      | -1.783379 | 0.894314  | 0.226113  |
| H      | -0.176148 | 1.577220  | 0.528927  |
| H      | -0.777316 | 1.422652  | -1.139803 |
| C      | 3.300424  | 0.619753  | 1.371511  |
| H      | 3.640842  | 1.099241  | 0.455174  |

|   |          |           |          |
|---|----------|-----------|----------|
| H | 3.375402 | 1.337372  | 2.192174 |
| H | 3.960350 | -0.229831 | 1.597368 |
| C | 1.373342 | -0.390332 | 2.450481 |
| H | 1.450652 | 0.334650  | 3.264555 |
| H | 0.323412 | -0.648922 | 2.315349 |
| H | 1.928971 | -1.292788 | 2.741533 |

### S5-TS

| Symbol | X         | Y         | Z         |
|--------|-----------|-----------|-----------|
| Si     | -0.501462 | 0.987402  | 0.019722  |
| H      | -1.926883 | 1.644933  | 0.410037  |
| H      | 0.077789  | 1.620161  | 1.234562  |
| H      | -0.481760 | 1.760164  | -1.245813 |
| C      | -1.282456 | -0.748031 | 0.081860  |
| C      | -2.659322 | -0.865279 | 0.328941  |
| C      | -0.559176 | -1.936095 | -0.110633 |
| C      | -3.287520 | -2.107006 | 0.384131  |
| H      | -3.254327 | 0.030187  | 0.478155  |
| C      | -1.181351 | -3.180525 | -0.051682 |
| H      | 0.504377  | -1.887732 | -0.311229 |
| C      | -2.548032 | -3.270147 | 0.195917  |
| H      | -4.353424 | -2.164534 | 0.575196  |
| H      | -0.597369 | -4.082101 | -0.201319 |
| H      | -3.032667 | -4.239113 | 0.240375  |
| C      | -2.751997 | 3.007927  | 0.349980  |
| O      | -1.933907 | 3.855378  | 0.426079  |
| O      | -3.864700 | 2.621793  | 0.257781  |
| P      | 2.685027  | 0.523549  | -0.130659 |
| O      | 1.199761  | 0.263722  | -0.418529 |
| C      | 2.971009  | 2.257193  | 0.223314  |
| H      | 2.493744  | 2.479755  | 1.180818  |
| H      | 4.042043  | 2.451893  | 0.304260  |
| H      | 2.533762  | 2.892985  | -0.548025 |
| N      | 3.689796  | 0.088486  | -1.365349 |
| N      | 3.132078  | -0.444083 | 1.140493  |
| C      | 3.894387  | 1.018102  | -2.480111 |
| H      | 4.083864  | 2.026829  | -2.115799 |
| H      | 4.773750  | 0.689556  | -3.036516 |
| H      | 3.035265  | 1.033437  | -3.160610 |
| C      | 3.653812  | -1.315089 | -1.791222 |
| H      | 4.603639  | -1.554493 | -2.272911 |
| H      | 3.526806  | -1.966805 | -0.927081 |
| H      | 2.839923  | -1.495275 | -2.502481 |
| C      | 2.184687  | -0.604527 | 2.246232  |

|   |          |           |          |
|---|----------|-----------|----------|
| H | 1.176721 | -0.767090 | 1.865722 |
| H | 2.478163 | -1.484581 | 2.821782 |
| H | 2.185039 | 0.265351  | 2.914670 |
| C | 4.525507 | -0.379358 | 1.588937 |
| H | 4.759684 | -1.298796 | 2.129023 |
| H | 5.194257 | -0.299990 | 0.732233 |
| H | 4.693600 | 0.472920  | 2.258775 |

**S6**

| Symbol | X         | Y         | Z         |
|--------|-----------|-----------|-----------|
| P      | -0.070487 | 1.251889  | -0.296050 |
| O      | -0.018369 | 1.951754  | -1.623948 |
| C      | 1.401889  | 0.222894  | -0.009327 |
| C      | 1.507986  | -0.590699 | 1.122322  |
| C      | 2.443642  | 0.271710  | -0.933736 |
| C      | 2.655467  | -1.346935 | 1.326494  |
| H      | 0.692891  | -0.637347 | 1.838688  |
| C      | 3.591866  | -0.489483 | -0.727066 |
| H      | 2.347974  | 0.902897  | -1.810505 |
| C      | 3.697414  | -1.295674 | 0.401330  |
| H      | 2.737986  | -1.978241 | 2.203579  |
| H      | 4.401223  | -0.452915 | -1.447075 |
| H      | 4.590973  | -1.888062 | 0.561631  |
| C      | -1.468012 | 0.098643  | -0.122940 |
| C      | -2.606241 | 0.430967  | 0.613729  |
| C      | -1.420100 | -1.118397 | -0.810464 |
| C      | -3.684468 | -0.448734 | 0.665189  |
| H      | -2.658654 | 1.370644  | 1.152317  |
| C      | -2.498826 | -1.992675 | -0.759641 |
| H      | -0.535526 | -1.385211 | -1.380847 |
| C      | -3.631353 | -1.657765 | -0.020368 |
| H      | -4.564402 | -0.188326 | 1.241767  |
| H      | -2.455661 | -2.935477 | -1.292291 |
| H      | -4.471294 | -2.341627 | 0.022330  |
| C      | -0.148320 | 2.362922  | 1.125257  |
| H      | 0.760845  | 2.967982  | 1.119702  |
| H      | -1.013395 | 3.022754  | 1.037105  |
| H      | -0.203326 | 1.801621  | 2.059828  |

**S6-TS**

| Symbol | X        | Y         | Z        |
|--------|----------|-----------|----------|
| Si     | 1.813903 | -0.085680 | 1.012995 |
| H      | 3.364569 | -0.462739 | 1.285568 |
| H      | 1.617068 | 0.120206  | 2.467777 |

|   |           |           |           |
|---|-----------|-----------|-----------|
| H | 1.595270  | -1.453182 | 0.470675  |
| C | 2.350265  | 1.333093  | -0.132530 |
| C | 3.714914  | 1.494640  | -0.418991 |
| C | 1.455098  | 2.243286  | -0.716668 |
| C | 4.167920  | 2.513122  | -1.253692 |
| H | 4.439127  | 0.813895  | 0.017383  |
| C | 1.903736  | 3.266054  | -1.548202 |
| H | 0.394523  | 2.151176  | -0.517738 |
| C | 3.261765  | 3.403400  | -1.820706 |
| H | 5.228199  | 2.611076  | -1.458828 |
| H | 1.190521  | 3.957014  | -1.984180 |
| H | 3.610788  | 4.198918  | -2.469615 |
| C | 4.324237  | -1.501601 | 1.964709  |
| O | 3.616009  | -2.239007 | 2.557758  |
| O | 5.390096  | -1.130519 | 1.610535  |
| P | -1.274625 | -0.599262 | 0.649972  |
| O | -0.038113 | 0.319782  | 0.737075  |
| C | -1.302749 | -1.445352 | -0.939337 |
| C | -2.219928 | -2.473862 | -1.174113 |
| C | -0.412876 | -1.048168 | -1.937718 |
| C | -2.239680 | -3.104910 | -2.411255 |
| H | -2.916912 | -2.777063 | -0.399399 |
| C | -0.439422 | -1.686231 | -3.174101 |
| H | 0.294417  | -0.246363 | -1.752171 |
| C | -1.349935 | -2.711335 | -3.408901 |
| H | -2.947948 | -3.903346 | -2.597390 |
| H | 0.251388  | -1.381825 | -3.951176 |
| H | -1.367774 | -3.206924 | -4.372603 |
| C | -2.770809 | 0.395265  | 0.787263  |
| C | -3.186886 | 0.832316  | 2.049016  |
| C | -3.480202 | 0.768771  | -0.356443 |
| C | -4.312959 | 1.637910  | 2.160875  |
| H | -2.638102 | 0.550071  | 2.941157  |
| C | -4.605614 | 1.576813  | -0.234966 |
| H | -3.160479 | 0.431033  | -1.336110 |
| C | -5.021377 | 2.008526  | 1.020413  |
| H | -4.637855 | 1.975137  | 3.137831  |
| H | -5.157327 | 1.865904  | -1.121414 |
| H | -5.900679 | 2.635600  | 1.111752  |
| C | -1.282281 | -1.835341 | 1.952010  |
| H | -1.187370 | -1.343001 | 2.921774  |
| H | -2.216598 | -2.398800 | 1.917375  |
| H | -0.439723 | -2.512765 | 1.800403  |

**S7**

| Symbol | X         | Y         | Z         |
|--------|-----------|-----------|-----------|
| P      | 1.366053  | -0.380324 | 0.407848  |
| O      | 2.109708  | 0.623081  | -0.411824 |
| N      | 1.481156  | -0.082869 | 2.050726  |
| H      | 2.435127  | -0.028684 | 2.394569  |
| H      | 0.912933  | -0.672025 | 2.651783  |
| C      | 1.944658  | -2.066843 | 0.053119  |
| C      | 1.529014  | -3.147082 | 0.836695  |
| C      | 2.812692  | -2.278275 | -1.017389 |
| C      | 1.980478  | -4.429049 | 0.548426  |
| H      | 0.850937  | -2.989022 | 1.670456  |
| C      | 3.264713  | -3.564186 | -1.303677 |
| H      | 3.132107  | -1.433830 | -1.617770 |
| C      | 2.848671  | -4.637120 | -0.522372 |
| H      | 1.658236  | -5.265761 | 1.157287  |
| H      | 3.940390  | -3.726750 | -2.135441 |
| H      | 3.200331  | -5.637914 | -0.745565 |
| C      | -0.430977 | -0.421289 | 0.153231  |
| C      | -1.253466 | 0.467289  | 0.852592  |
| C      | -0.987893 | -1.266317 | -0.810420 |
| C      | -2.620081 | 0.499248  | 0.597213  |
| H      | -0.825993 | 1.129250  | 1.597391  |
| C      | -2.354763 | -1.228466 | -1.065303 |
| H      | -0.357716 | -1.957742 | -1.360257 |
| C      | -3.170639 | -0.348015 | -0.360528 |
| H      | -3.254466 | 1.185941  | 1.145429  |
| H      | -2.782324 | -1.888488 | -1.810911 |
| H      | -4.236281 | -0.322182 | -0.557427 |

**S7-TS**

| Symbol | X         | Y         | Z         |
|--------|-----------|-----------|-----------|
| Si     | -0.383118 | 0.988016  | 0.166848  |
| H      | -1.775024 | 1.640438  | -0.347499 |
| H      | -0.475370 | 1.776273  | 1.416571  |
| H      | 0.313668  | 1.603771  | -0.994304 |
| C      | -1.143878 | -0.747267 | 0.041107  |
| C      | -2.358250 | -0.910744 | -0.642147 |
| C      | -0.560151 | -1.890165 | 0.609390  |
| C      | -2.958639 | -2.161255 | -0.767611 |
| H      | -2.846791 | -0.047080 | -1.082563 |
| C      | -1.163373 | -3.140008 | 0.498561  |
| H      | 0.378732  | -1.801736 | 1.142852  |
| C      | -2.362666 | -3.279932 | -0.194635 |

|   |           |           |           |
|---|-----------|-----------|-----------|
| H | -3.893193 | -2.259554 | -1.308706 |
| H | -0.694926 | -4.006561 | 0.952110  |
| H | -2.829630 | -4.254262 | -0.285760 |
| C | -2.458512 | 2.943782  | -0.868262 |
| O | -1.691357 | 3.814042  | -0.639490 |
| O | -3.488214 | 2.542120  | -1.291145 |
| P | 2.745736  | 0.560472  | 0.383464  |
| O | 1.291291  | 0.273560  | 0.778895  |
| N | 3.120071  | 2.150324  | 0.631359  |
| H | 2.627267  | 2.828214  | 0.056949  |
| H | 4.103469  | 2.378216  | 0.736907  |
| C | 2.997216  | 0.061979  | -1.328380 |
| C | 4.063222  | 0.593674  | -2.057618 |
| C | 2.143876  | -0.879406 | -1.907852 |
| C | 4.273965  | 0.180597  | -3.367585 |
| H | 4.722800  | 1.327845  | -1.606466 |
| C | 2.359373  | -1.285654 | -3.220200 |
| H | 1.315420  | -1.288942 | -1.339431 |
| C | 3.422552  | -0.757143 | -3.946828 |
| H | 5.098399  | 0.592636  | -3.937091 |
| H | 1.696347  | -2.012051 | -3.674723 |
| H | 3.587321  | -1.074824 | -4.969872 |
| C | 3.880418  | -0.345007 | 1.438701  |
| C | 4.049829  | 0.078030  | 2.761679  |
| C | 4.544041  | -1.479477 | 0.968233  |
| C | 4.889403  | -0.635407 | 3.606857  |
| H | 3.531944  | 0.958586  | 3.125911  |
| C | 5.381050  | -2.188537 | 1.823460  |
| H | 4.413464  | -1.808035 | -0.056860 |
| C | 5.553320  | -1.766876 | 3.137782  |
| H | 5.025426  | -0.309325 | 4.630992  |
| H | 5.898917  | -3.068286 | 1.460854  |
| H | 6.207790  | -2.321187 | 3.800448  |

**S8**

| Symbol | X         | Y         | Z         |
|--------|-----------|-----------|-----------|
| C      | 1.125536  | -0.014666 | -0.013826 |
| C      | -0.967124 | -1.269869 | 0.168180  |
| C      | -1.721570 | -0.055859 | -0.326437 |
| C      | -1.112840 | 1.187486  | 0.308158  |
| C      | 0.346473  | 1.278672  | -0.125221 |
| H      | -1.266986 | -2.179225 | -0.350750 |
| H      | -1.656535 | 0.008166  | -1.417347 |
| H      | -2.773033 | -0.175500 | -0.056811 |

|   |           |           |           |
|---|-----------|-----------|-----------|
| H | -1.645310 | 2.093021  | 0.014119  |
| H | -1.175575 | 1.105378  | 1.397941  |
| H | 0.395871  | 1.544028  | -1.187906 |
| H | 0.906831  | 2.037145  | 0.421018  |
| H | -1.132709 | -1.408818 | 1.240398  |
| O | 2.328288  | -0.040243 | 0.019003  |
| O | 0.462287  | -1.182105 | -0.034726 |

**S8-TS**

| Symbol | X         | Y         | Z         |
|--------|-----------|-----------|-----------|
| Si     | -0.427737 | 0.602353  | -0.122368 |
| H      | -1.435242 | 1.900399  | -0.234608 |
| H      | 0.172899  | 0.959723  | -1.421368 |
| H      | 0.153956  | 1.146156  | 1.119052  |
| C      | -1.911459 | -0.558675 | -0.029292 |
| C      | -3.140432 | -0.039017 | 0.404272  |
| C      | -1.863475 | -1.911638 | -0.394505 |
| C      | -4.274100 | -0.842103 | 0.488172  |
| H      | -3.218694 | 1.010158  | 0.673396  |
| C      | -2.999936 | -2.712835 | -0.328606 |
| H      | -0.931877 | -2.348739 | -0.732122 |
| C      | -4.206299 | -2.181736 | 0.118356  |
| H      | -5.210422 | -0.419334 | 0.834639  |
| H      | -2.941561 | -3.754698 | -0.623261 |
| H      | -5.089461 | -2.808102 | 0.175365  |
| C      | -1.492758 | 3.330650  | -0.136111 |
| O      | -2.648484 | 3.572791  | 0.034061  |
| O      | -0.385319 | 3.754602  | -0.260300 |
| C      | 2.056844  | -0.856887 | 0.005128  |
| C      | 4.029958  | 0.563518  | -0.028029 |
| C      | 4.831154  | -0.655017 | -0.415180 |
| C      | 4.350753  | -1.848135 | 0.400664  |
| C      | 2.883956  | -2.102684 | 0.071464  |
| H      | 4.188998  | 1.408747  | -0.693147 |
| H      | 4.717377  | -0.855785 | -1.484632 |
| H      | 5.882306  | -0.432713 | -0.223005 |
| H      | 4.931125  | -2.742838 | 0.176865  |
| H      | 4.462918  | -1.633870 | 1.467066  |
| H      | 2.786651  | -2.552525 | -0.924048 |
| H      | 2.392442  | -2.776691 | 0.773724  |
| H      | 4.227766  | 0.866344  | 1.000990  |
| O      | 0.817898  | -0.939569 | 0.004256  |
| O      | 2.583409  | 0.327077  | -0.095521 |

**S9**

| Symbol | X         | Y         | Z         |
|--------|-----------|-----------|-----------|
| C      | -1.359445 | 0.025910  | 0.013965  |
| O      | -2.473654 | -0.095820 | -0.424742 |
| O      | -0.773274 | 1.233713  | -0.072091 |
| C      | 0.552732  | 1.473762  | 0.431376  |
| C      | -0.586042 | -1.118051 | 0.624416  |
| C      | 1.637257  | 0.793408  | -0.390719 |
| C      | 0.614956  | -1.552631 | -0.236281 |
| C      | 1.852577  | -0.678943 | -0.048248 |
| H      | 0.610071  | 1.190057  | 1.486309  |
| H      | 1.388087  | 0.912650  | -1.450666 |
| H      | -1.298457 | -1.936201 | 0.714235  |
| H      | 0.317686  | -1.564521 | -1.290765 |
| H      | 0.657044  | 2.555760  | 0.368024  |
| H      | -0.245735 | -0.852106 | 1.629624  |
| H      | 2.568726  | 1.339471  | -0.216672 |
| H      | 0.861882  | -2.581783 | 0.032845  |
| H      | 2.666484  | -1.075168 | -0.661490 |
| H      | 2.177423  | -0.752031 | 0.996173  |

**S9-TS**

| Symbol | X         | Y         | Z         |
|--------|-----------|-----------|-----------|
| Si     | -0.418156 | 0.535129  | -0.175709 |
| H      | -1.394526 | 1.859522  | -0.273215 |
| H      | 0.156391  | 0.870352  | -1.492275 |
| H      | 0.210948  | 1.068212  | 1.046761  |
| C      | -1.927159 | -0.587206 | -0.036648 |
| C      | -3.131133 | -0.035187 | 0.425947  |
| C      | -1.921676 | -1.942476 | -0.396315 |
| C      | -4.282054 | -0.809264 | 0.541269  |
| H      | -3.176166 | 1.016399  | 0.693062  |
| C      | -3.075651 | -2.714742 | -0.297960 |
| H      | -1.010043 | -2.403956 | -0.755604 |
| C      | -4.256838 | -2.151639 | 0.176075  |
| H      | -5.198606 | -0.362095 | 0.909243  |
| H      | -3.050692 | -3.759034 | -0.588654 |
| H      | -5.153718 | -2.755418 | 0.257563  |
| C      | -1.424712 | 3.280096  | -0.116956 |
| O      | -2.569192 | 3.535658  | 0.105185  |
| O      | -0.316118 | 3.693642  | -0.266516 |
| C      | 2.029681  | -0.991458 | -0.129941 |
| O      | 0.790454  | -1.040576 | -0.080296 |
| O      | 2.578713  | 0.181762  | -0.248417 |

|   |          |           |           |
|---|----------|-----------|-----------|
| C | 4.027072 | 0.359033  | -0.312650 |
| C | 2.837802 | -2.246956 | -0.083592 |
| C | 4.623656 | -0.189862 | -1.593957 |
| C | 3.566279 | -2.517493 | -1.415296 |
| C | 4.843832 | -1.700901 | -1.589546 |
| H | 4.469045 | -0.087631 | 0.580452  |
| H | 3.986727 | 0.110754  | -2.432383 |
| H | 2.140859 | -3.050633 | 0.144872  |
| H | 2.879837 | -2.336402 | -2.248655 |
| H | 4.135726 | 1.439121  | -0.258852 |
| H | 3.562757 | -2.173678 | 0.733373  |
| H | 5.584792 | 0.313451  | -1.728470 |
| H | 3.813275 | -3.580228 | -1.432159 |
| H | 5.324819 | -1.992408 | -2.526217 |
| H | 5.536949 | -1.953907 | -0.779712 |
